# Supplementary material for: Ru(ii)-catalyzed intermolecular C–H amidation of weakly coordinating ketones
Source: Royal Society of Chemistry journal article supplement (doi:10.1039/c3cc42613k), 2013-01-01

# Ru(II)-Catalyzed Intermolecular C-H Amidation of Weakly Coordinating Ketones

## (Supporting Information)

Qing-Zhong Zheng,<sup>†</sup> Yu-Feng Liang,<sup>†</sup> Chong Qin,<sup>†</sup> and Ning Jiao<sup>\*,†,§</sup>

<sup>†</sup>State Key Laboratory of Natural and Biomimetic Drugs, Peking University, Xue Yuan Rd. 38, Beijing 100191, China, <sup>§</sup>Laboratory of Chemical Genomics, School of Chemical Biology and Biotechnology, Peking University Shenzhen Graduate School, Shenzhen, China, 518055.

## Table of Contents

|                                                                 |         |
|-----------------------------------------------------------------|---------|
| General remarks                                                 | S2      |
| Experimental procedure and characterization data                | S3-S17  |
| References                                                      | S18     |
| <sup>1</sup> H NMR and <sup>13</sup> C NMR spectra for products | S19-S68 |

## General remarks

All manipulations were conducted with schlenk tubes.  $^1\text{H}$ -NMR spectra were recorded on a Bruker AVIII-400 spectrometers. Chemical shifts (in ppm) were calibrated with  $\text{CDCl}_3$ .  $^{13}\text{C}$ -NMR spectra were obtained by using the same NMR spectrometers and were calibrated with  $\text{CDCl}_3$ . Unless otherwise noted, materials obtained from commercial suppliers were used without further purification.

## Experimental procedure and characterization data

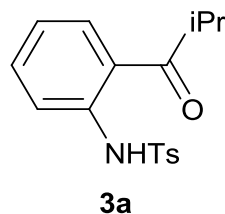

### 1) N-(2-Isobutyrylphenyl)-4-methylbenzenesulfonamide (**3a**)

#### Typical procedure:

The reaction of isobutyrophenone (**1a**) (0.2 mmol, 30 uL), 4-methylbenzenesulfonyl azide (**2a**) (0.4 mmol, 81 uL), [Ru(*p*-Cymene)Cl<sub>2</sub>]<sub>2</sub> (2.5 mol %, 2.9 mg), AgSbF<sub>6</sub> (10 mol %, 6.9 mg), Cu(OAc)<sub>2</sub> (30 mol %, 10.9 mg), in 1.0 mL DCE at 80 °C under Ar for 21 h as monitored by TLC. The resulting mixture was concentrated and purified by flash chromatography on silica gel to afford 46.7 mg (74%) of **3a** as solid: <sup>1</sup>H NMR (400 MHz, CDCl<sub>3</sub>): δ 11.39 (s, 1H), 7.80 (d, *J* = 7.6 Hz, 1H), 7.73-7.68 (m, 3H), 7.44 (t, *J* = 8.4 Hz, 1H), 7.19 (t, *J* = 8.4 Hz, 2H), 7.08 (d, *J* = 7.2 Hz, 1H), 3.55-3.45 (m, 1H), 2.34 (s, 3H), 1.08 (d, *J* = 6.8 Hz, 6H) ppm. <sup>13</sup>C NMR (100 MHz, CDCl<sub>3</sub>): δ 208.6, 143.7, 140.3, 136.6, 134.4, 130.6, 129.5, 127.1, 122.7, 121.7, 120.1, 36.0, 21.4, 19.1 ppm. IR:(KBr) ν<sub>max</sub> = 3087, 2975, 1648, 1601, 1492, 1165, 565 cm<sup>-1</sup>. HRMS *m/z* (ESI): Calcd. for C<sub>17</sub>H<sub>20</sub>NO<sub>3</sub>S [M+H]<sup>+</sup> 318.1164, Found: 318.1164.

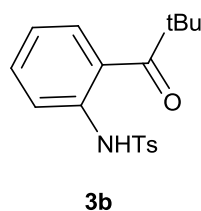

### 2) 4-Methyl-N-(2-pivaloylphenyl)benzenesulfonamide (**3b**)<sup>1</sup>

The reaction of 2,2-dimethyl-1-phenylpropan-1-one (**1b**) (0.3 mmol, 49.7 mg), 4-methylbenzenesulfonyl azide (**2a**) (0.6 mmol, 122 uL), [Ru(*p*-Cymene)Cl<sub>2</sub>]<sub>2</sub> (2.5 mol %, 4.3 mg), AgSbF<sub>6</sub> (10 mol %, 10.4 mg), Cu(OAc)<sub>2</sub> (30 mol %, 16.4 mg), in 1.5

mL DCE at 80 °C under Ar for 24 h as monitored by TLC. The resulting mixture was concentrated and purified by flash chromatography on silica gel to afford 82.5 mg (83%) of **3b** as solid:  $^1\text{H}$  NMR (400 MHz,  $\text{CDCl}_3$ ):  $\delta$  9.78 (s, 1H), 7.75 (d,  $J = 9.2$  Hz, 2H), 7.09 (t,  $J = 7.6$  Hz, 2H), 2.34 (s, 3H), 1.14 (s, 9H) ppm.  $^{13}\text{C}$  NMR (100 MHz,  $\text{CDCl}_3$ ):  $\delta$  210.9, 143.7, 137.6, 136.4, 132.5, 129.5, 129.2, 127.0, 126.0, 123.1, 123.0, 44.7, 28.2, 21.3 ppm. MS (70 eV):  $m/z$  (%): 331.1 (7)  $[\text{M}]^+$ , 274.1 (100).

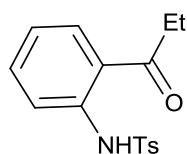

**3c**

### 3) 4-Methyl-N-(2-propionylphenyl)benzenesulfonamide (**3c**)

The reaction of propiophenone (**1c**) (0.3 mmol, 40.7 mg), 4-methylbenzenesulfonyl azide (**2a**) (0.6 mmol, 122  $\mu\text{L}$ ),  $[\text{Ru}(p\text{-Cymene})\text{Cl}_2]_2$  (2.5 mol %, 4.3 mg),  $\text{AgSbF}_6$  (10 mol %, 10.4 mg),  $\text{Cu}(\text{OAc})_2$  (30 mol %, 16.4 mg), in 1.5 mL DCE at 80 °C under Ar for 24 h as monitored by TLC. The resulting mixture was concentrated and purified by flash chromatography on silica gel to afford 77.0 mg (85%) of **3c** as solid:  $^1\text{H}$  NMR (400 MHz,  $\text{CDCl}_3$ ):  $\delta$  11.44 (s, 1H), 7.80 (d,  $J = 6.8$  Hz, 1H), 7.71-7.66 (m, 3H), 7.43 (t,  $J = 8.8$  Hz, 1H), 7.20 (d,  $J = 8.0$  Hz, 2H), 7.06 (t,  $J = 7.2$  Hz, 1H), 2.91 (q,  $J = 7.2$  Hz, 2H), 2.34 (s, 3H), 1.12 (t,  $J = 6.8$  Hz, 3H) ppm.  $^{13}\text{C}$  NMR (100 MHz,  $\text{CDCl}_3$ ):  $\delta$  204.9, 143.7, 139.7, 136.5, 134.4, 130.7, 129.5, 127.1, 122.6, 122.2, 119.4, 32.7, 21.3, 8.1 ppm. IR:(KBr)  $\nu_{\text{max}}$  = 3434, 2977, 1983, 1817, 1650, 1455, 1158, 929, 662  $\text{cm}^{-1}$ . HRMS  $m/z$  (ESI): Calcd. for  $\text{C}_{16}\text{H}_{18}\text{NO}_3\text{S}$   $[\text{M}+\text{H}]^+$  304.1007, Found: 304.1002.

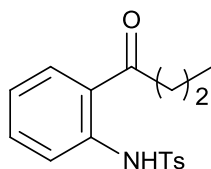

**3d**

### 4) N-(2-Butylphenyl)-4-methylbenzenesulfonamide (**3d**)<sup>2</sup>

The reaction of 1-phenylbutan-1-one (**1d**) (0.3 mmol, 44.9 mg),

4-methylbenzenesulfonyl azide (**2a**) (0.6 mmol, 122  $\mu$ L), [Ru(*p*-Cymene)Cl<sub>2</sub>]<sub>2</sub> (2.5 mol %, 4.3 mg), AgSbF<sub>6</sub> (10 mol %, 10.4 mg), Cu(OAc)<sub>2</sub> (30 mol %, 16.4 mg), in 1.5 mL DCE at 80 °C under Ar for 38 h as monitored by TLC. The resulting mixture was concentrated and purified by flash chromatography on silica gel to afford 76.9 mg (81%) of **3d** as solid: <sup>1</sup>H NMR (400 MHz, CDCl<sub>3</sub>):  $\delta$  11.45 (s, 1H), 7.80 (d, *J* = 7.2 Hz, 1H), 7.70-7.67 (m, 3H), 7.43 (t, *J* = 8.8 Hz, 1H), 7.20 (d, *J* = 8.0 Hz, 2H), 7.06 (t, *J* = 8.0 Hz, 1H), 2.85 (t, *J* = 7.2 Hz, 2H), 2.34 (s, 3H), 1.69-1.60 (m, 2H), 0.93 (t, *J* = 7.2 Hz, 3H) ppm. <sup>13</sup>C NMR (100 MHz, CDCl<sub>3</sub>):  $\delta$  204.5, 143.7, 139.8, 136.5, 134.4, 130.9, 129.5, 127.1, 122.6, 122.4, 119.5, 41.4, 21.3, 17.7, 13.5 ppm. MS (70 eV): *m/z* (%): 317.1 (35) [M]<sup>+</sup>, 91.1 (100).

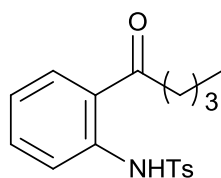

**3e**

### 5) 4-Methyl-N-(2-pentanoylphenyl)benzenesulfonamide (**3e**)<sup>3</sup>

The reaction of 1-phenylpentan-1-one (**1e**) (0.3 mmol, 49.2 mg), 4-methylbenzenesulfonyl azide (**2a**) (0.6 mmol, 122  $\mu$ L), [Ru(*p*-Cymene)Cl<sub>2</sub>]<sub>2</sub> (2.5 mol %, 4.3 mg), AgSbF<sub>6</sub> (10 mol %, 10.4 mg), Cu(OAc)<sub>2</sub> (30 mol %, 16.4 mg), in 1.5 mL DCE at 80 °C under Ar for 24 h as monitored by TLC. The resulting mixture was concentrated and purified by flash chromatography on silica gel to afford 64.6 mg (65%) of **3e** as solid: <sup>1</sup>H NMR (400 MHz, CDCl<sub>3</sub>):  $\delta$  11.43 (s, 1H), 7.80 (d, *J* = 6.8 Hz, 1H), 7.70-7.68 (m, 3H), 7.43 (t, *J* = 6.8 Hz, 1H), 7.19 (d, *J* = 8.0 Hz, 2H), 7.06 (t, *J* = 7.2 Hz, 1H), 2.86 (t, *J* = 7.2 Hz, 2H), 2.34 (s, 3H), 1.62-1.54 (m, 2H), 1.37-1.29 (m, 2H), 0.92 (t, *J* = 7.2 Hz, 3H) ppm. <sup>13</sup>C NMR (100 MHz, CDCl<sub>3</sub>):  $\delta$  204.7, 143.7, 139.7, 136.5, 134.4, 130.9, 129.5, 127.1, 122.7, 122.4, 119.6, 39.2, 26.4, 22.1, 21.3, 13.7 ppm. MS (70 eV): *m/z* (%): 331.1 (30) [M]<sup>+</sup>, 91.0 (100).

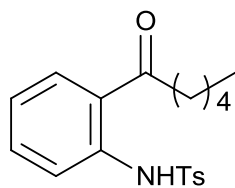

**3f**

### 6) N-(2-Hexanoylphenyl)-4-methylbenzenesulfonamide (3f)

The reaction of 1-phenylhexan-1-one (**1f**) (0.3 mmol, 54.0 mg), 4-methylbenzenesulfonyl azide (**2a**) (0.6 mmol, 122  $\mu$ L), [Ru(*p*-Cymene)Cl<sub>2</sub>]<sub>2</sub> (2.5 mol %, 4.3 mg), AgSbF<sub>6</sub> (10 mol %, 10.4 mg), Cu(OAc)<sub>2</sub> (30 mol %, 16.4 mg), in 1.5 mL DCE at 80 °C under Ar for 38 h as monitored by TLC. The resulting mixture was concentrated and purified by flash chromatography on silica gel to afford 73.45 mg (71%) of **3f** as solid: <sup>1</sup>H NMR (400 MHz, CDCl<sub>3</sub>):  $\delta$  11.35 (s, 1H), 7.58 (d, *J* = 6.8 Hz, 1H), 7.62-7.59 (m, 3H), 7.35 (t, *J* = 6.8 Hz, 1H), 7.11 (d, *J* = 8.0 Hz, 2H), 6.98 (t, *J* = 7.2 Hz, 1H), 2.77 (t, *J* = 7.2 Hz, 2H), 2.26 (s, 3H), 1.56-1.48 (m, 2H), 1.27-1.17 (m, 4H), 0.82 (t, *J* = 7.2 Hz, 3H) ppm. <sup>13</sup>C NMR (100 MHz, CDCl<sub>3</sub>):  $\delta$  204.7, 143.7, 139.8, 136.5, 134.4, 130.9, 129.5, 127.1, 122.7, 122.4, 119.5, 39.5, 31.2, 24.0, 22.3, 21.3, 13.8 ppm. IR:(KBr)  $\nu_{\text{max}}$  = 3062, 2956, 1712, 1649, 1493, 1168, 918, 562 cm<sup>-1</sup>. HRMS *m/z* (ESI): Calcd. for C<sub>19</sub>H<sub>24</sub>NO<sub>3</sub>S [M+H]<sup>+</sup> 346.1477, Found: 346.1469.

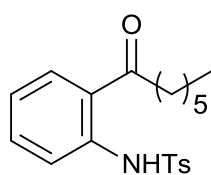

**3g**

### 7) N-(2-Heptanoylphenyl)-4-methylbenzenesulfonamide (3g)

The reaction of 1-phenylheptan-1-one (**1g**) (0.3 mmol, 58.3 mg), 4-methylbenzenesulfonyl azide (**2a**) (0.6 mmol, 122  $\mu$ L), [Ru(*p*-Cymene)Cl<sub>2</sub>]<sub>2</sub> (2.5 mol %, 4.3 mg), AgSbF<sub>6</sub> (10 mol %, 10.4 mg), Cu(OAc)<sub>2</sub> (30 mol %, 16.4 mg), in 1.5 mL DCE at 80 °C under Ar for 30 h as monitored by TLC. The resulting mixture was concentrated and purified by flash chromatography on silica gel to afford 80.9 mg (75%) of **3g** as solid: <sup>1</sup>H NMR (400 MHz, CDCl<sub>3</sub>):  $\delta$  11.35 (s, 1H), 7.71 (d, *J* = 6.8

Hz, 1H), 7.61-7.59 (m, 3H), 7.34 (t,  $J = 7.2$  Hz, 1H), 7.11 (d,  $J = 4.0$  Hz, 2H), 6.97 (t,  $J = 8.0$  Hz, 1H), 2.77 (t,  $J = 7.2$  Hz, 2H), 2.25 (s, 3H), 1.53-1.47 (m, 2H), 1.25-1.16 (m, 6H), 0.80 (t,  $J = 6.4$  Hz, 3H) ppm.  $^{13}\text{C}$  NMR (100 MHz,  $\text{CDCl}_3$ ):  $\delta$  204.7, 143.6, 139.8, 136.5, 134.4, 130.9, 129.4, 127.1, 122.7, 122.4, 119.5, 39.5, 31.5, 28.7, 24.3, 22.3, 21.3, 13.9 ppm. IR:(KBr)  $\nu_{\text{max}} = 3430, 3084, 1740, 1649, 1495, 1158, 930, 568$   $\text{cm}^{-1}$ . HRMS  $m/z$  (ESI): Calcd. for  $\text{C}_{20}\text{H}_{26}\text{NO}_3\text{S}$   $[\text{M}+\text{H}]^+$  360.1633, Found: 360.1631.

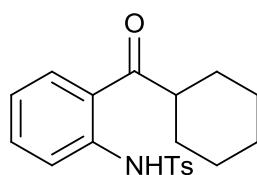

**3h**

**8) N-(2-(Cyclohexanecarbonyl)phenyl)-4-methylbenzenesulfonamide (3h)**<sup>4</sup>

The reaction of cyclohexyl(phenyl)methanone (**1h**) (0.3 mmol, 57.6 mg), 4-methylbenzenesulfonyl azide (**2a**) (0.6 mmol, 122  $\mu\text{L}$ ),  $[\text{Ru}(p\text{-Cymene})\text{Cl}_2]_2$  (2.5 mol %, 4.3 mg),  $\text{AgSbF}_6$  (10 mol %, 10.4 mg),  $\text{Cu}(\text{OAc})_2$  (30 mol %, 16.4 mg), in 1.5 mL DCE at 80 °C under Ar for 24 h as monitored by TLC. The resulting mixture was concentrated and purified by flash chromatography on silica gel to afford 86.6 mg (81%) of **3h** as solid:  $^1\text{H}$  NMR (400 MHz,  $\text{CDCl}_3$ ):  $\delta$  11.39 (s, 1H), 7.79 (d,  $J = 6.8$  Hz, 1H), 7.72-7.66 (m, 3H), 7.43 (d,  $J = 8.4$  Hz, 1H), 7.19 (d,  $J = 8.0$  Hz, 2H), 7.08 (t,  $J = 8.0$  Hz, 1H), 3.21-3.15 (m, 1H), 2.33 (s, 3H), 1.80-1.77 (m, 2H), 1.73-1.68 (m, 3H), 1.35-1.18 (m, 5H) ppm.  $^{13}\text{C}$  NMR (100 MHz,  $\text{CDCl}_3$ ):  $\delta$  207.9, 143.6, 140.1, 136.6, 134.2, 130.5, 129.4, 127.1, 122.8, 121.9, 120.1, 46.2, 29.3, 25.7, 25.5, 21.3 ppm. MS (70 eV):  $m/z$  (%): 357.1 (25)  $[\text{M}]^+$ , 274.0 (100);

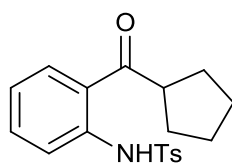

**3i**

**9) N-(2-(Cyclopentanecarbonyl)phenyl)-4-methylbenzenesulfonamide (3i)**

The reaction of cyclopentyl(phenyl)methanone (**1i**) (0.3 mmol, 54.5 mg), 4-methylbenzenesulfonyl azide (**2a**) (0.6 mmol, 122 uL), [Ru(*p*-Cymene)Cl<sub>2</sub>]<sub>2</sub> (2.5 mol %, 4.3 mg), AgSbF<sub>6</sub> (10 mol %, 10.4 mg), Cu(OAc)<sub>2</sub> (30 mol %, 16.4 mg), in 1.5 mL DCE at 80 °C under Ar for 24 h as monitored by TLC. The resulting mixture was concentrated and purified by flash chromatography on silica gel to afford 60.4 mg (59%) of **3i** as solid: <sup>1</sup>H NMR (400 MHz, CDCl<sub>3</sub>): δ 11.41 (s, 1H), 7.84 (d, *J* = 6.8 Hz, 1H), 7.71-7.66 (m, 3H), 7.43 (t, *J* = 7.2 Hz, 1H), 7.18 (d, *J* = 8.0 Hz, 2H), 7.08 (t, *J* = 6.8 Hz, 1H), 3.66-3.59 (m, 1H), 2.34 (s, 3H), 1.84-1.76 (m, 2H), 1.70-1.58 (m, 6H) ppm. <sup>13</sup>C NMR (100 MHz, CDCl<sub>3</sub>): δ 206.9, 143.6, 140.0, 136.6, 134.1, 131.0, 129.4, 127.1, 122.8, 122.6, 120.1, 46.9, 30.0, 26.1, 21.3 ppm. IR:(KBr)  $\nu_{\max}$  = 3441, 2951, 1738, 1644, 1491, 1156, 659, 566 cm<sup>-1</sup>. HRMS *m/z* (ESI): Calcd. for C<sub>19</sub>H<sub>22</sub>NO<sub>3</sub>S [M+H]<sup>+</sup> 344.1320, Found: 344.1321.

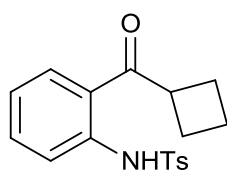

**3j**

#### **10) N-(2-(Cyclobutanecarbonyl)phenyl)-4-methylbenzenesulfonamide (**3j**)**

The reaction of cyclobutyl(phenyl)methanone (**1j**) (0.3 mmol, 49.6 mg), 4-methylbenzenesulfonyl azide (**2a**) (0.6 mmol, 122 uL), [Ru(*p*-Cymene)Cl<sub>2</sub>]<sub>2</sub> (2.5 mol %, 4.3 mg), AgSbF<sub>6</sub> (10 mol %, 10.4 mg), Cu(OAc)<sub>2</sub> (30 mol %, 16.4 mg), in 1.5 mL DCE at 80 °C under Ar for 24 h as monitored by TLC. The resulting mixture was concentrated and purified by flash chromatography on silica gel to afford 63.1 mg (64%) of **3j** as solid: <sup>1</sup>H NMR (400 MHz, CDCl<sub>3</sub>): δ 11.49 (s, 1H), 7.71-7.67 (m, 3H), 7.60 (d, *J* = 6.8 Hz, 1H), 7.41 (t, *J* = 7.2 Hz, 1H), 7.20 (d, *J* = 8.0 Hz, 2H), 7.03 (t, *J* = 8.4 Hz, 1H), 3.94-3.86 (m, 1H), 2.34 (s, 3H), 2.25-2.19 (m, 4H), 3.08-1.97 (m, 1H), 1.86-1.77 (m, 1H) ppm. <sup>13</sup>C NMR (100 MHz, CDCl<sub>3</sub>): δ 205.1, 143.7, 140.1, 136.5, 134.3, 130.8, 129.4, 127.1, 122.7, 121.0, 119.7, 42.9, 25.0, 21.3, 17.7 ppm. IR:(KBr)  $\nu_{\max}$  = 3452, 2948, 1710, 1639, 1600, 1453, 934, 663 cm<sup>-1</sup>. HRMS *m/z* (ESI): Calcd. for C<sub>18</sub>H<sub>20</sub>NO<sub>3</sub>S [M+H]<sup>+</sup> 330.1164, Found: 330.1165.



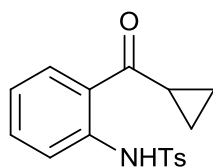

**3k**

**11) N-(2-(Cyclopropanecarbonyl)phenyl)-4-methylbenzenesulfonamide (3k)**<sup>4,5</sup>

The reaction of cyclopropyl(phenyl)methanone (**1k**) (0.3 mmol, 45.2 mg), 4-methylbenzenesulfonyl azide (**2a**) (0.6 mmol, 122  $\mu$ L), [Ru(*p*-Cymene)Cl<sub>2</sub>]<sub>2</sub> (2.5 mol %, 4.3 mg), AgSbF<sub>6</sub> (10 mol %, 10.4 mg), Cu(OAc)<sub>2</sub> (30 mol %, 16.4 mg), in 1.5 mL DCE at 80 °C under Ar for 38 h as monitored by TLC. The resulting mixture was concentrated and purified by flash chromatography on silica gel to afford 76.0 mg (80%) of **3k** as solid: <sup>1</sup>H NMR (400 MHz, CDCl<sub>3</sub>):  $\delta$  11.21 (s, 1H), 7.98 (d, *J* = 6.8 Hz, 1H), 7.67-7.65 (m, 3H), 7.44 (t, *J* = 8.4 Hz, 1H), 7.19 (d, *J* = 8.0 Hz, 2H), 7.10 (t, *J* = 8.0 Hz, 1H), 2.54-2.47 (m, 1H), 2.34 (s, 3H), 1.18-1.45 (m, 2H), 1.03-0.99 (m, 2H) ppm. <sup>13</sup>C NMR (100 MHz, CDCl<sub>3</sub>):  $\delta$  203.7, 143.6, 139.0, 136.4, 134.1, 130.8, 129.4, 127.0, 124.0, 122.9, 119.8, 21.3, 18.0, 12.3 ppm. MS (70 eV): *m/z* (%): 315.1 (70) [M]<sup>+</sup>, 132.0 (100).

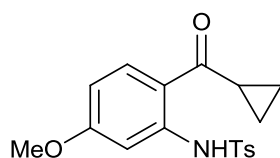

**3l**

**12)**

**N-(2-(Cyclopropanecarbonyl)-5-methoxyphenyl)-4-methylbenzenesulfonamide (3l)**<sup>6</sup>

The reaction of cyclopropyl(4-methoxyphenyl)methanone (**1l**) (0.3 mmol, 53.9 mg), 4-methylbenzenesulfonyl azide (**2a**) (0.6 mmol, 122  $\mu$ L), [Ru(*p*-Cymene)Cl<sub>2</sub>]<sub>2</sub> (2.5 mol %, 4.3 mg), AgSbF<sub>6</sub> (10 mol %, 10.4 mg), Cu(OAc)<sub>2</sub> (30 mol %, 16.4 mg), in 1.5 mL DCE at 80 °C under Ar for 24 h as monitored by TLC. The resulting mixture was concentrated and purified by flash chromatography on silica gel to afford 33.2 mg (32%) of **3l** as solid: <sup>1</sup>H NMR (400 MHz, CDCl<sub>3</sub>):  $\delta$  11.84 (s, 1H), 7.93 (d, *J* = 9.2 Hz,

1H), 7.72 (d,  $J = 8.4$  Hz, 2H), 7.22-7.17 (m, 3H), 6.59-6.56 (m, 1H), 3.81 (s, 3H), 2.51-2.45 (m, 1H), 2.35 (s, 3H), 1.18-1.14 (m, 2H), 1.03-0.95 (m, 2H) ppm.  $^{13}\text{C}$  NMR (100 MHz,  $\text{CDCl}_3$ ):  $\delta$  202.0, 164.0, 143.7, 142.0, 136.6, 133.0, 129.5, 127.2, 116.7, 109.1, 103.3, 55.5, 21.4, 17.4, 11.6 ppm. MS (70 eV):  $m/z$  (%): 345.1 (50)  $[\text{M}]^+$ , 91.0 (100).

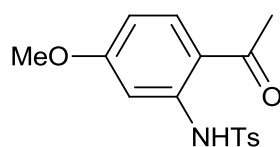

**3m**

### 13) N-(2-Acetyl-5-methoxyphenyl)-4-methylbenzenesulfonamide (3m)

The reaction of 1-(4-methoxyphenyl)ethanone (**1m**) (0.3 mmol, 46.0 mg), 4-methylbenzenesulfonyl azide (**2a**) (0.6 mmol, 122  $\mu\text{L}$ ),  $[\text{Ru}(p\text{-Cymene})\text{Cl}_2]_2$  (2.5 mol %, 4.3 mg),  $\text{AgSbF}_6$  (10 mol %, 10.4 mg),  $\text{Cu}(\text{OAc})_2$  (30 mol %, 16.4 mg), in 1.5 mL DCE at 80  $^\circ\text{C}$  under Ar for 48 h as monitored by TLC. The resulting mixture was concentrated and purified by flash chromatography on silica gel to afford 28.9 mg (30%) of **3m** as solid:  $^1\text{H}$  NMR (400 MHz,  $\text{CDCl}_3$ ):  $\delta$  11.90 (s, 1H), 7.75 (d,  $J = 8.0$  Hz, 2H), 7.71 (d,  $J = 8.8$  Hz, 1H), 7.24-7.17 (m, 3H), 6.54-6.51 (m, 1H), 3.81 (s, 3H), 2.51 (s, 3H), 2.36 (s, 3H) ppm.  $^{13}\text{C}$  NMR (100 MHz,  $\text{CDCl}_3$ ):  $\delta$  200.7, 164.3, 143.2, 142.7, 136.5, 133.9, 130.2, 129.6, 127.4, 127.2, 115.4, 108.9, 102.6, 55.5, 27.7, 21.4 ppm. IR:(KBr)  $\nu_{\text{max}} = 3267, 2922, 1689, 1640, 1569, 1265, 1090, 660$   $\text{cm}^{-1}$ . HRMS  $m/z$  (ESI): Calcd. for  $\text{C}_{16}\text{H}_{18}\text{NO}_4\text{S}$   $[\text{M}+\text{H}]^+$  320.0957, Found: 320.0958.

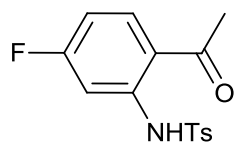

**3n**

### 14) N-(2-Acetyl-5-fluorophenyl)-4-methylbenzenesulfonamide (3n)

The reaction of 1-(4-fluorophenyl)ethanone (**1n**) (0.3 mmol, 42.3 mg), 4-methylbenzenesulfonyl azide (**2a**) (0.6 mmol, 122  $\mu\text{L}$ ),  $[\text{Ru}(p\text{-Cymene})\text{Cl}_2]_2$  (2.5

mol %, 4.3 mg), AgSbF<sub>6</sub> (10 mol %, 10.4 mg), Cu(OAc)<sub>2</sub> (30 mol %, 16.4 mg), in 1.5 mL DCE at 100 °C under Ar for 48 h as monitored by TLC. The resulting mixture was concentrated and purified by flash chromatography on silica gel to afford 65.7 mg (71%) of **3n** as solid: <sup>1</sup>H NMR (400 MHz, CDCl<sub>3</sub>): δ 11.80 (s, 1H), 7.85-7.82 (m, 1H), 7.75 (d, *J* = 8.4 Hz, 2H), 7.42-7.38 (m, 1H), 7.25 (d, *J* = 8.4 Hz, 2H), 6.72 (d, *J* = 9.2 Hz, 1H), 2.56 (s, 3H), 2.37 (s, 3H) ppm. <sup>13</sup>C NMR (100 MHz, CDCl<sub>3</sub>): δ 201.1, 165.9 (d, *J* = 254.8 Hz), 142.8 (d, *J* = 11.2 Hz), 134.6 (d, *J* = 11.0 Hz), 118.3 (d, *J* = 1.9 Hz), 109.6 (d, *J* = 22.1 Hz), 105.4 (d, *J* = 26.9 Hz), 28.0, 21.4 ppm. IR:(KBr) ν<sub>max</sub> = 3443, 1941, 1650, 1588, 1159, 894, 820, 657 cm<sup>-1</sup>. HRMS *m/z* (ESI): Calcd. for C<sub>15</sub>H<sub>15</sub>FNO<sub>3</sub>S [M+H]<sup>+</sup> 308.0757, Found: 308.0757.

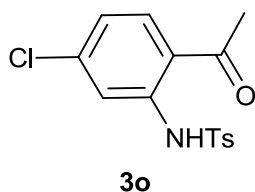

#### 15) N-(2-Acetyl-5-chlorophenyl)-4-methylbenzenesulfonamide (**3o**)<sup>7</sup>

The reaction of 1-(4-chlorophenyl)ethanone (**1o**) (0.3 mmol, 47.3 mg), 4-methylbenzenesulfonyl azide (**2a**) (0.6 mmol, 122 uL), [Ru(*p*-Cymene)Cl<sub>2</sub>]<sub>2</sub> (2.5 mol %, 4.3 mg), AgSbF<sub>6</sub> (10 mol %, 10.4 mg), Cu(OAc)<sub>2</sub> (30 mol %, 16.4 mg), in 1.5 mL DCE at 80 °C under Ar for 36 h as monitored by TLC. The resulting mixture was concentrated and purified by flash chromatography on silica gel to afford 64.1 mg (66%) of **3o** as solid: <sup>1</sup>H NMR (400 MHz, CDCl<sub>3</sub>): δ 11.59 (s, 1H), 7.75-7.69 (m, 4H), 7.25 (d, *J* = 8.4 Hz, 2H), 7.69 (t, *J* = 6.4 Hz, 1H), 2.55 (s, 3H), 2.37 (s, 3H) ppm. <sup>13</sup>C NMR (100 MHz, CDCl<sub>3</sub>): δ 201.4, 144.2, 141.2, 141.0, 136.2, 133.0, 129.7, 127.1, 122.6, 120.1, 118.4, 28.0, 21.4 ppm. MS (70 eV): *m/z* (%): 323.0 (22) [M]<sup>+</sup>, 91.1 (100).

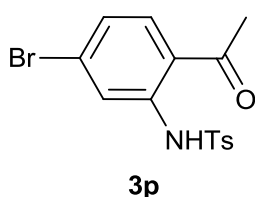

### 16) N-(2-Acetyl-5-bromophenyl)-4-methylbenzenesulfonamide (**3p**)

The reaction of 1-(4-bromophenyl)ethanone (**1p**) (0.3 mmol, 60.9 mg), 4-methylbenzenesulfonyl azide (**2a**) (0.6 mmol, 122 uL), [Ru(*p*-Cymene)Cl<sub>2</sub>]<sub>2</sub> (2.5 mol %, 4.3 mg), AgSbF<sub>6</sub> (10 mol %, 10.4 mg), Cu(OAc)<sub>2</sub> (30 mol %, 16.4 mg), in 1.5 mL DCE at 100 °C under Ar for 48 h as monitored by TLC. The resulting mixture was concentrated and purified by flash chromatography on silica gel to afford 50.7 mg (46%) of **3p** as solid: <sup>1</sup>H NMR (400 MHz, CDCl<sub>3</sub>): δ 11.54 (s, 1H), 7.87 (s, 1H), 7.74 (d, *J* = 8.4 Hz, 2H), 7.64 (d, *J* = 8.8 Hz, 1H), 7.25 (d, *J* = 8.4 Hz, 2H), 7.18-7.15 (m, 1H), 2.54 (s, 3H), 2.37 (s, 3H) ppm. <sup>13</sup>C NMR (100 MHz, CDCl<sub>3</sub>): δ 201.6, 144.2, 141.0, 136.1, 132.9, 129.7, 127.1, 125.6, 121.5, 120.5, 28.0, 21.4 ppm. IR:(KBr) ν<sub>max</sub> 3427, 2922, 1901, 1644, 1491, 1166, 1090, 930, 661 cm<sup>-1</sup>. HRMS m/z (ESI): Calcd. for C<sub>15</sub>H<sub>15</sub>BrNO<sub>3</sub>S [M+H]<sup>+</sup> 367.9956, Found: 367.9956.

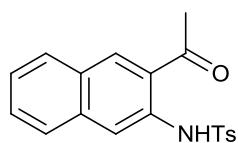

**3q**

### 17) N-(3-Acetylnaphthalen-2-yl)-4-methylbenzenesulfonamide (**3q**)

The reaction of 1-(naphthalen-2-yl)ethanone (**1q**) (0.3 mmol, 51.6 mg), 4-methylbenzenesulfonyl azide (**2a**) (0.6 mmol, 122 uL), [Ru(*p*-Cymene)Cl<sub>2</sub>]<sub>2</sub> (2.5 mol %, 4.3 mg), AgSbF<sub>6</sub> (10 mol %, 10.4 mg), Cu(OAc)<sub>2</sub> (30 mol %, 16.4 mg), in 1.5 mL DCE at 80 °C under Ar for 24 h as monitored by TLC. The resulting mixture was concentrated and purified by flash chromatography on silica gel to afford 66.5 mg (65%) of **3q** as solid: <sup>1</sup>H NMR (400 MHz, CDCl<sub>3</sub>): δ 11.02 (s, 1H), 8.31 (s, 1H), 8.00 (s, 1H), 7.78 (d, *J* = 8.4 Hz, 1H), 7.72-7.68 (m, 3H), 7.55 (t, *J* = 7.2 Hz, 1H), 7.39 (t, *J* = 6.0 Hz, 1H), 7.14 (d, *J* = 8.0 Hz, 2H), 2.63 (s, 3H), 2.29 (s, 3H) ppm. <sup>13</sup>C NMR (100 MHz, CDCl<sub>3</sub>): δ 202.3, 143.6, 136.2, 135.9, 134.8, 134.3, 129.8, 129.4, 128.9, 128.5, 127.2, 127.1, 125.8, 123.2, 117.0, 27.9, 21.3 ppm. IR:(KBr) ν<sub>max</sub> = 3429, 3088, 2919, 1654, 1597, 1156, 665 cm<sup>-1</sup>. HRMS m/z (ESI): Calcd. for C<sub>19</sub>H<sub>18</sub>NO<sub>3</sub>S [M+H]<sup>+</sup> 340.1007, Found: 340.1005.

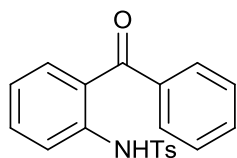

**3r**

**18) N-(2-Benzoylphenyl)-4-methylbenzenesulfonamide (3r)**<sup>3,8</sup>

The reaction of benzophenone (**1r**) (0.3 mmol, 55.8 mg), 4-methylbenzenesulfonyl azide (**2a**) (0.6 mmol, 122 uL), [Ru(*p*-Cymene)Cl<sub>2</sub>]<sub>2</sub> (2.5 mol %, 4.3 mg), AgSbF<sub>6</sub> (10 mol %, 10.4 mg), Cu(OAc)<sub>2</sub> (30 mol %, 16.4 mg), in 1.5 mL DCE at 80 °C under Ar for 30 h as monitored by TLC. The resulting mixture was concentrated and purified by flash chromatography on silica gel to afford 78.0 mg (74%) of **3r** as solid: <sup>1</sup>H NMR (400 MHz, CDCl<sub>3</sub>): δ 9.99 (s, 1H), 7.79 (d, *J* = 8.4 Hz, 1H), 7.58-7.49 (m, 4H), 7.42-7.36 (m, 5H), 7.10 (t, *J* = 7.6 Hz, 1H), 7.02 (d, *J* = 8.4 Hz, 2H), 2.22 (s, 3H) ppm. <sup>13</sup>C NMR (100 MHz, CDCl<sub>3</sub>): δ 198.4, 143.6, 138.8, 137.4, 135.7, 133.6, 132.9, 132.5, 129.7, 129.4, 127.9, 127.0, 126.2, 123.4, 123.0, 21.2 ppm. MS (70 eV): *m/z* (%): 351.1 (35) [M]<sup>+</sup>, 91.0 (100).

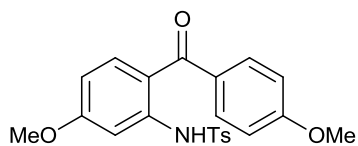

**3s**

**19) N-(5-Methoxy-2-(4-methoxybenzoyl)phenyl)-4-methylbenzenesulfonamide (3s)**

The reaction of bis(4-methoxyphenyl)methanone (**1s**) (0.3 mmol, 74.2 mg), 4-methylbenzenesulfonyl azide (**2a**) (0.6 mmol, 122 uL), [Ru(*p*-Cymene)Cl<sub>2</sub>]<sub>2</sub> (2.5 mol %, 4.3 mg), AgSbF<sub>6</sub> (10 mol %, 10.4 mg), Cu(OAc)<sub>2</sub> (30 mol %, 16.4 mg), in 1.5 mL DCE at 80 °C under Ar for 24 h as monitored by TLC. The resulting mixture was concentrated and purified by flash chromatography on silica gel to afford 90.1 mg (73%) of **3s** as solid: <sup>1</sup>H NMR (400 MHz, CDCl<sub>3</sub>): δ 10.64 (s, 1H), 7.62 (d, *J* = 7.6 Hz, 2H), 7.41-7.36 (m, 3H), 7.27 (s, 1H), 7.08 (d, *J* = 7.6 Hz, 2H), 6.88 (d, *J* = 8.4 Hz, 2H), 6.56 (d, *J* = 8.8 Hz, H), 3.87 (s, 3H), 3.85 (s, 3H), 2.27 (s, 3H) ppm. <sup>13</sup>C NMR

(100 MHz, CDCl<sub>3</sub>): δ 196.4, 163.4, 162.9, 143.6, 141.6, 135.9, 135.1, 131.9, 130.6, 129.4, 127.1, 118.5, 113.2, 109.1, 106.4, 55.5, 55.4, 21.2 ppm. IR:(KBr) ν<sub>max</sub> = 344, 3222, 1921, 1684, 1572, 1159, 852, 705 cm<sup>-1</sup>. HRMS m/z (ESI): Calcd. for C<sub>22</sub>H<sub>22</sub>NO<sub>5</sub>S [M+H]<sup>+</sup> 412.1219, Found: 412.1212.

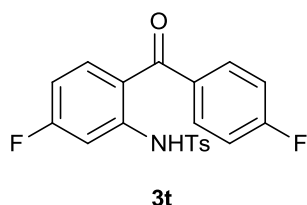

### 20) N-(5-Fluoro-2-(4-fluorobenzoyl)phenyl)-4-methylbenzenesulfonamide (**3t**)

The reaction of bis(4-fluorophenyl)methanone (**1t**) (0.3 mmol, 67.5 mg), 4-methylbenzenesulfonyl azide (**2a**) (0.6 mmol, 122 uL), [Ru(*p*-Cymene)Cl<sub>2</sub>]<sub>2</sub> (2.5 mol %, 4.3 mg), AgSbF<sub>6</sub> (10 mol %, 10.4 mg), Cu(OAc)<sub>2</sub> (30 mol %, 16.4 mg), in 1.5 mL DCE at 100 °C under Ar for 48 h as monitored by TLC. The resulting mixture was concentrated and purified by flash chromatography on silica gel to afford 90.9 mg (78%) of **3t** as solid: <sup>1</sup>H NMR (400 MHz, CDCl<sub>3</sub>): δ 10.41 (s, 1H), 7.65 (d, *J* = 8.0 Hz, 2H), 7.52-7.41 (m, 4H), 7.15-7.09 (m, 4H), 6.76 (t, *J* = 10.0 Hz, 1H), 2.30 (s, 3H) ppm. <sup>13</sup>C NMR (100 MHz, CDCl<sub>3</sub>): δ 196.2, 165.4 (d, *J* = 254.9 Hz), 165.3 (d, *J* = 253.8 Hz), 144.2, 142.1 (d, *J* = 1.9 Hz), 135.8, 135.6 (d, *J* = 11.3 Hz), 133.9 (d, *J* = 3.0 Hz), 132.2 (d, *J* = 8.4 Hz), 129.7, 127.2, 121.1 (d, *J* = 3.5 Hz), 115.4 (d, *J* = 21.6 Hz), 110.3 (d, *J* = 22.0 Hz), 108.8 (d, *J* = 27.2 Hz), 21.4 ppm. IR:(KBr) ν<sub>max</sub> = 3233, 3094, 1712, 1633, 1502, 1173, 1091, 682 cm<sup>-1</sup>. HRMS m/z (ESI): Calcd. for C<sub>20</sub>H<sub>16</sub>F<sub>2</sub>NO<sub>3</sub>S [M+H]<sup>+</sup> 388.0819, Found: 388.0825.

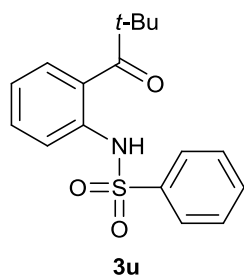

### 21) N-(2-Pivaloylphenyl)benzenesulfonamide (**3u**)<sup>1</sup>

The reaction of 2,2-dimethyl-1-phenylpropan-1-one (**1b**) (0.3 mmol, 49.7 mg), benzenesulfonyl azide (**2b**) (0.6 mmol, 109.9 mg), [Ru(*p*-Cymene)Cl<sub>2</sub>]<sub>2</sub> (2.5 mol %, 4.3 mg), AgSbF<sub>6</sub> (10 mol %, 10.4 mg), Cu(OAc)<sub>2</sub> (30 mol %, 16.4 mg), in 1.5 mL DCE at 80 °C under Ar for 25 h as monitored by TLC. The resulting mixture was concentrated and purified by flash chromatography on silica gel to afford 83.8 mg (88%) of **3u** as solid: <sup>1</sup>H NMR (400 MHz, CDCl<sub>3</sub>): δ 9.83 (s, 1H), 7.78-7.69 (m, 4H), 7.50 (t, *J* = 7.2 Hz, 1H), 7.44-7.38 (m, 3H), 7.10 (t, *J* = 6.8 Hz, 1H), 1.12 (s, 9H) ppm. <sup>13</sup>C NMR (100 MHz, CDCl<sub>3</sub>): δ 211.0, 139.4, 137.4, 132.8, 132.5, 129.2, 128.9, 126.9, 126.1, 123.3, 123.2, 44.7, 28.2 ppm. MS (70 eV): *m/z* (%): 317.1 (5) [M]<sup>+</sup>, 260.0 (100).

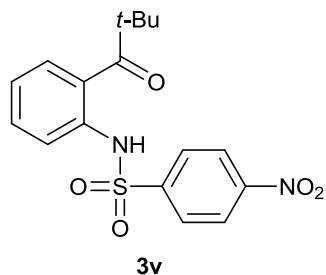

## 22) 4-nitro-N-(2-pivaloylphenyl)benzenesulfonamide (**3v**)<sup>1</sup>

The reaction of 2,2-dimethyl-1-phenylpropan-1-one (**1b**) (0.3 mmol, 49.7 mg), 4-nitrobenzenesulfonyl azide (**2c**) (0.6 mmol, 136.9 mg), [Ru(*p*-Cymene)Cl<sub>2</sub>]<sub>2</sub> (2.5 mol %, 4.3 mg), AgSbF<sub>6</sub> (10 mol %, 10.4 mg), Cu(OAc)<sub>2</sub> (30 mol %, 16.4 mg), in 1.5 mL DCE at 100 °C under Ar for 26 h as monitored by TLC. The resulting mixture was concentrated and purified by flash chromatography on silica gel to afford 78.3 mg (72%) of **3v** as solid: <sup>1</sup>H NMR (400 MHz, CDCl<sub>3</sub>): δ 10.18 (s, 1H), 8.27 (d, *J* = 8.8 Hz, 2H), 7.96 (d, *J* = 8.8 Hz, 2H), 7.83 (t, *J* = 8.4 Hz, 1H), 7.73 (d, *J* = 8.0 Hz, 1H), 7.46 (t, *J* = 7.6 Hz, 1H), 7.15 (t, *J* = 8.0 Hz, 1H), 1.19 (s, 9H) ppm. <sup>13</sup>C NMR (100 MHz, CDCl<sub>3</sub>): δ 211.0, 150.0, 145.1, 137.0, 133.0, 129.8, 128.4, 125.4, 124.1, 123.6, 122.4, 44.9, 28.4 ppm. MS (70 eV): *m/z* (%): 362.2 (4) [M]<sup>+</sup>, 305.1 (100).

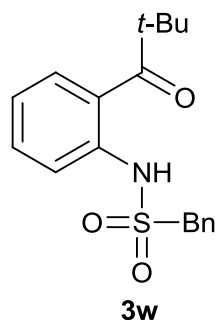

### 23) 1-Phenyl-N-(2-pivaloylphenyl)methanesulfonamide (**3w**)

The reaction of 2,2-dimethyl-1-phenylpropan-1-one (**1b**) (0.3 mmol, 49.7 mg), phenylmethanesulfonyl azide (**2d**) (0.6 mmol, 118.3 mg), [Ru(*p*-Cymene)Cl<sub>2</sub>]<sub>2</sub> (2.5 mol %, 4.3 mg), AgSbF<sub>6</sub> (10 mol %, 10.4 mg), Cu(OAc)<sub>2</sub> (30 mol %, 16.4 mg), in 1.5 mL DCE at 80 °C under Ar for 25 h as monitored by TLC. The resulting mixture was concentrated and purified by flash chromatography on silica gel to afford 69.6 mg (70%) of **3w** as solid: <sup>1</sup>H NMR (400 MHz, CDCl<sub>3</sub>): δ 10.00 (s, 1H), 7.92 (d, *J* = 8.0 Hz, 1H), 7.63 (d, *J* = 8.4 Hz, 1H), 7.41 (t, *J* = 8.4 Hz, 1H), 7.32-7.21 (m, 5H), 7.08 (t, *J* = 8.0 Hz, 1H), 4.38 (s, 2H), 1.35 (s, 9H) ppm. <sup>13</sup>C NMR (100 MHz, CDCl<sub>3</sub>): δ 210.6, 139.2, 133.1, 130.5, 130.2, 128.8, 128.7, 128.2, 122.9, 121.7, 119.2, 58.4, 45.1, 28.6 ppm. IR:(KBr) ν<sub>max</sub> = 3033, 2932, 1711, 1639, 1491, 1153, 922, 697 cm<sup>-1</sup>. HRMS *m/z* (ESI): Calcd. for C<sub>18</sub>H<sub>21</sub>KNO<sub>3</sub>S [M+K]<sup>+</sup> 370.0879, Found: 370.0880.

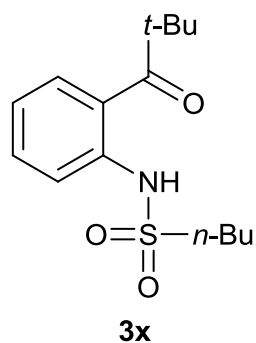

### 24) N-(2-Pivaloylphenyl)butane-1-sulfonamide (**3x**)

The reaction of 2,2-dimethyl-1-phenylpropan-1-one (**1b**) (0.3 mmol, 49.7 mg), butane-1-sulfonyl azide (**2e**) (0.6 mmol, 97.9 mg), [Ru(*p*-Cymene)Cl<sub>2</sub>]<sub>2</sub> (2.5 mol %, 4.3 mg), AgSbF<sub>6</sub> (10 mol %, 10.4 mg), Cu(OAc)<sub>2</sub> (30 mol %, 16.4 mg), in 1.5 mL DCE at 80 °C under Ar for 25 h as monitored by TLC. The resulting mixture was



concentrated and purified by flash chromatography on silica gel to afford 55.3 mg (62%) of **3x** as solid:  $^1\text{H}$  NMR (400 MHz,  $\text{CDCl}_3$ ):  $\delta$  9.76 (s, 1H), 7.92 (d,  $J = 8.0$  Hz, 1H), 7.75 (d,  $J = 8.4$  Hz, 1H), 7.47 (t,  $J = 8.0$  Hz, 1H), 7.12 (t,  $J = 7.6$  Hz, 1H), 3.11 (t,  $J = 4.8$  Hz, 2H), 1.79-1.72 (m, 2H), 1.44-1.23 (m, 11H), 0.89 (t,  $J = 7.2$  Hz, 3H) ppm.  $^{13}\text{C}$  NMR (100 MHz,  $\text{CDCl}_3$ ):  $\delta$  211.0, 138.7, 133.0, 129.9, 124.1, 122.1, 120.0, 52.0, 45.2, 28.6, 25.3, 21.2, 13.4 ppm. IR:(KBr)  $\nu_{\text{max}} = 3424, 2920, 2055, 1639, 1452, 1061, 759, 505$   $\text{cm}^{-1}$ . HRMS  $m/z$  (ESI): Calcd. for  $\text{C}_{15}\text{H}_{24}\text{NO}_3\text{S}$   $[\text{M}+\text{H}]^+$  298.1477, Found: 298.1475.

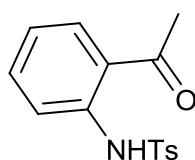

**3y**

#### 25) N-(2-Acetylphenyl)-4-methylbenzenesulfonamide (**3y**)<sup>9</sup>

The reaction of acetophenone (**1y**) (0.3 mmol, 36.4 mg), 4-methylbenzenesulfonyl azide (**2a**) (0.6 mmol, 122  $\mu\text{L}$ ),  $[\text{Ru}(p\text{-Cymene})\text{Cl}_2]_2$  (2.5 mol %, 4.3 mg),  $\text{AgSbF}_6$  (10 mol %, 10.4 mg),  $\text{Cu}(\text{OAc})_2$  (30 mol %, 16.4 mg), in 1.5 mL DCE at 80  $^\circ\text{C}$  under Ar for 24 h as monitored by TLC. The resulting mixture was concentrated and purified by flash chromatography on silica gel to afford 64.8 mg (75%) of **3y** as solid:  $^1\text{H}$  NMR (400 MHz,  $\text{CDCl}_3$ ):  $\delta$  11.47 (s, 1H), 7.79 (d,  $J = 9.2$  Hz, 1H), 7.72 (d,  $J = 8.0$  Hz, 2H), 7.67 (d,  $J = 8.0$  Hz, 1H), 7.41 (t,  $J = 7.2$  Hz, 1H), 7.21 (d,  $J = 8.0$  Hz, 2H), 7.05 (t,  $J = 8.8$  Hz, 1H), 2.55 (s, 3H), 2.35 (s, 3H) ppm.  $^{13}\text{C}$  NMR (100 MHz,  $\text{CDCl}_3$ ):  $\delta$  202.3, 143.8, 139.9, 136.4, 134.8, 131.8, 129.5, 127.1, 1225.5, 122.1, 118.9, 28.0, 21.4 ppm. MS (70 eV):  $m/z$  (%): 289.1 (50)  $[\text{M}]^+$ , 91.1 (100).

## Reference

1. B. Xiao, T.-J. Gong, J. Xu, Z.-J. Liu, L. Liu, *J. Am. Chem. Soc.*, 2011, 133,1466.
2. L. A. Elson, C. S. Gibson, J. D. A. Johnson, *J. Chem. Soc.*, 1930, 1128.
3. Y.s Hari, T. Kanie, T. Miyagi, T. Aoyama, *Synthesis*, 2006, 8, 1249
4. S. Khong, O. Kwon, *J. Org. Chem.*, 2012 , 77, 8257
5. D. A. Cortes, K. A. M. Kremer, U.S. (2000), US 6127576 A 20001003
6. W. N. Speckamp, R. Neeter, P. D. Rademaker, H. O. Huisman, *Tetrahedron Lett.*, 1968, 35, 3795.
7. C. Theeraladanon, *Tetrahedron*, 2004, 60, 3017
8. A. V. Butin, *Tetrahedron*, 2006, 63, 474
9. M. Carril, R. SanMartin, F. Churruca, I. Tellitu, E. Domínguez, *Org. Lett.*, 2005, 7, 4787.

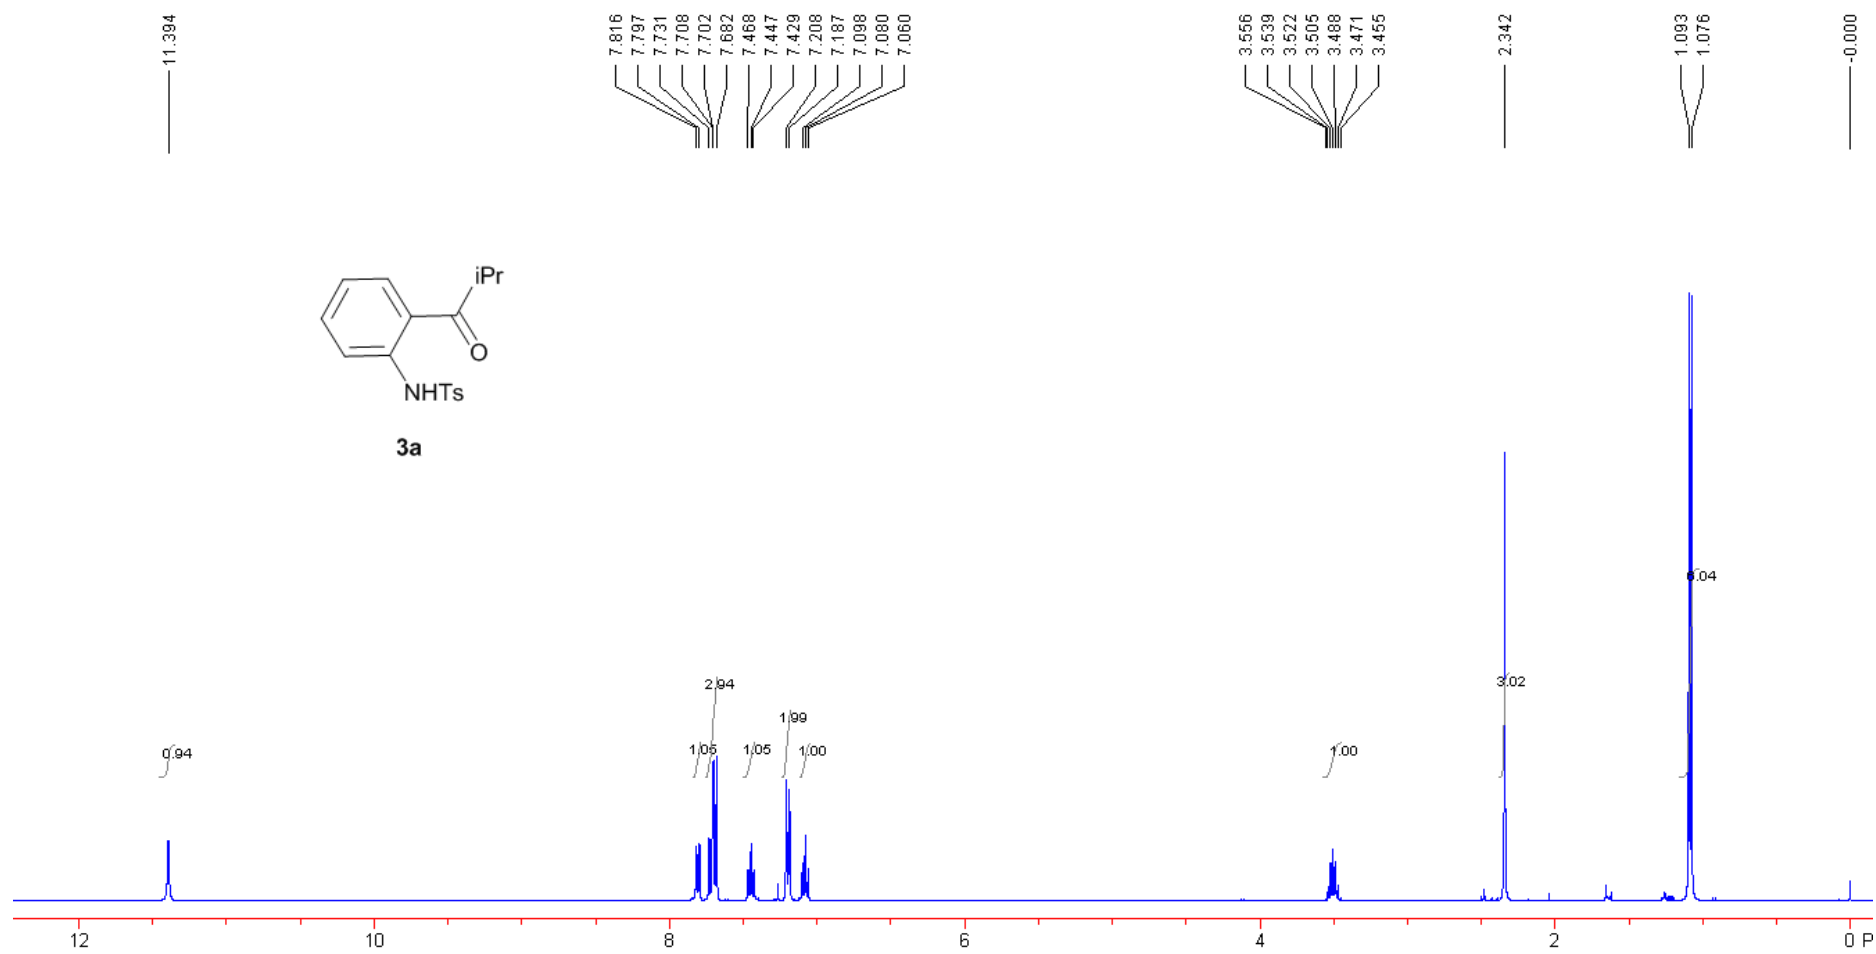

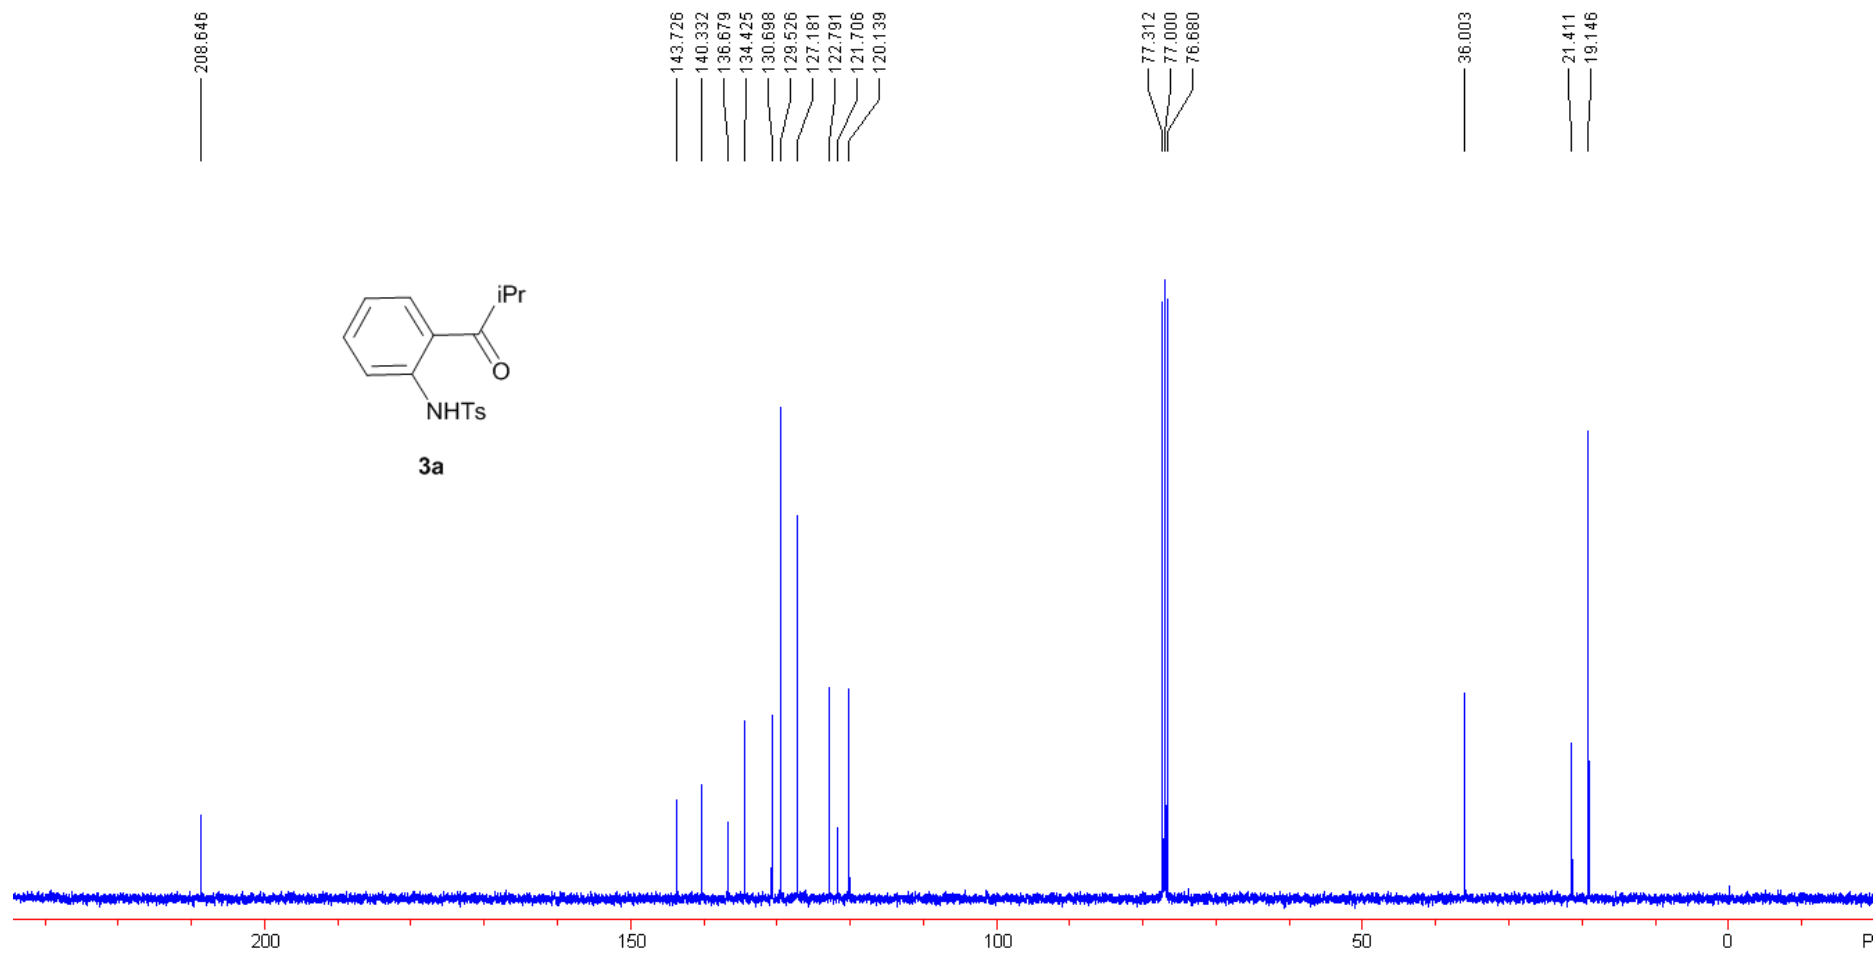

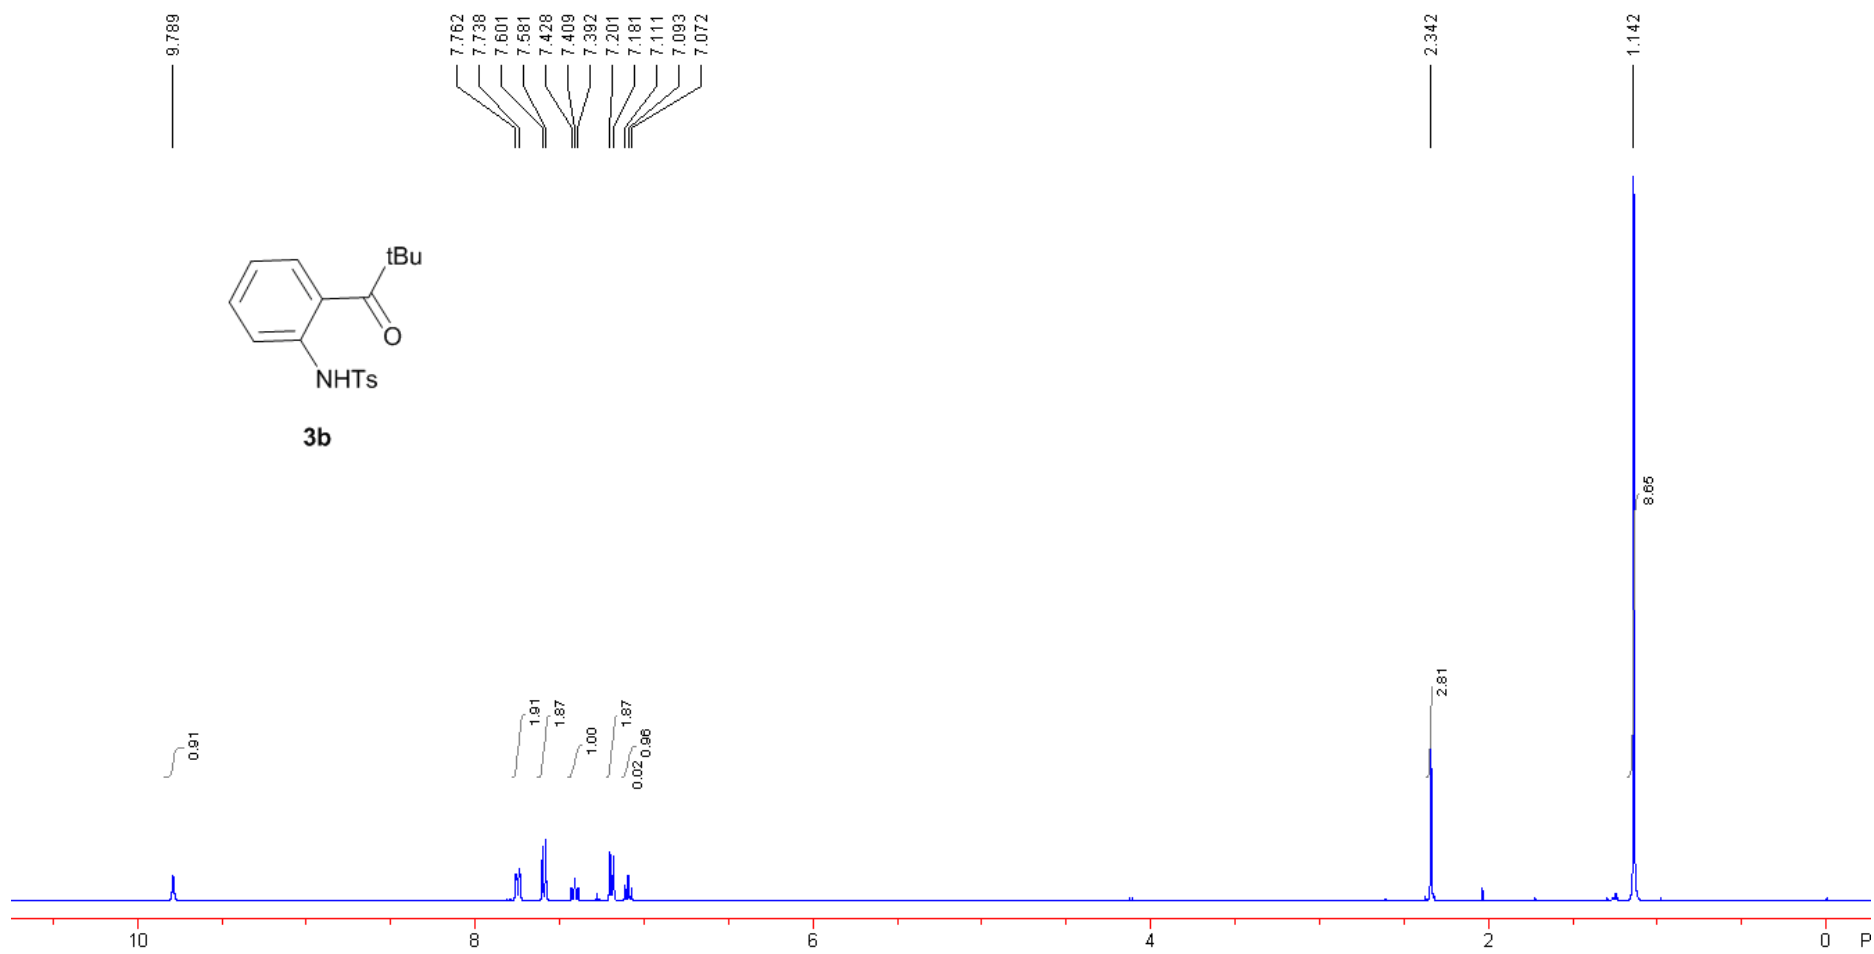

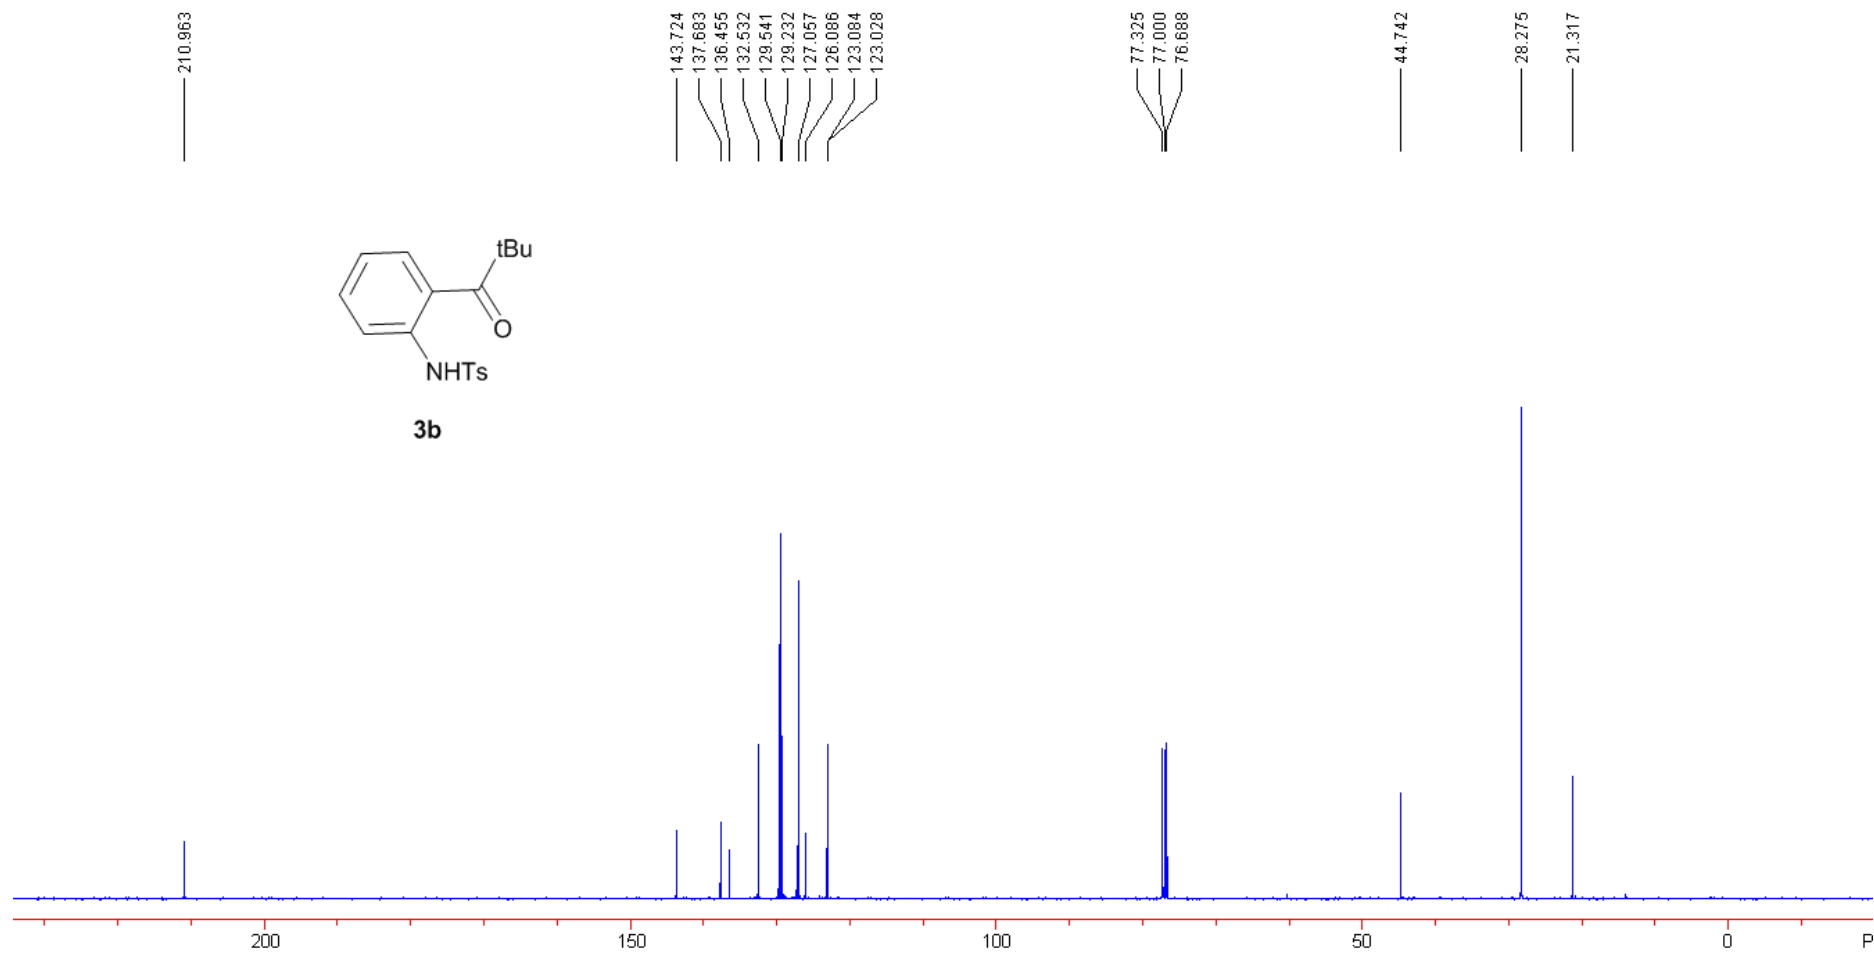

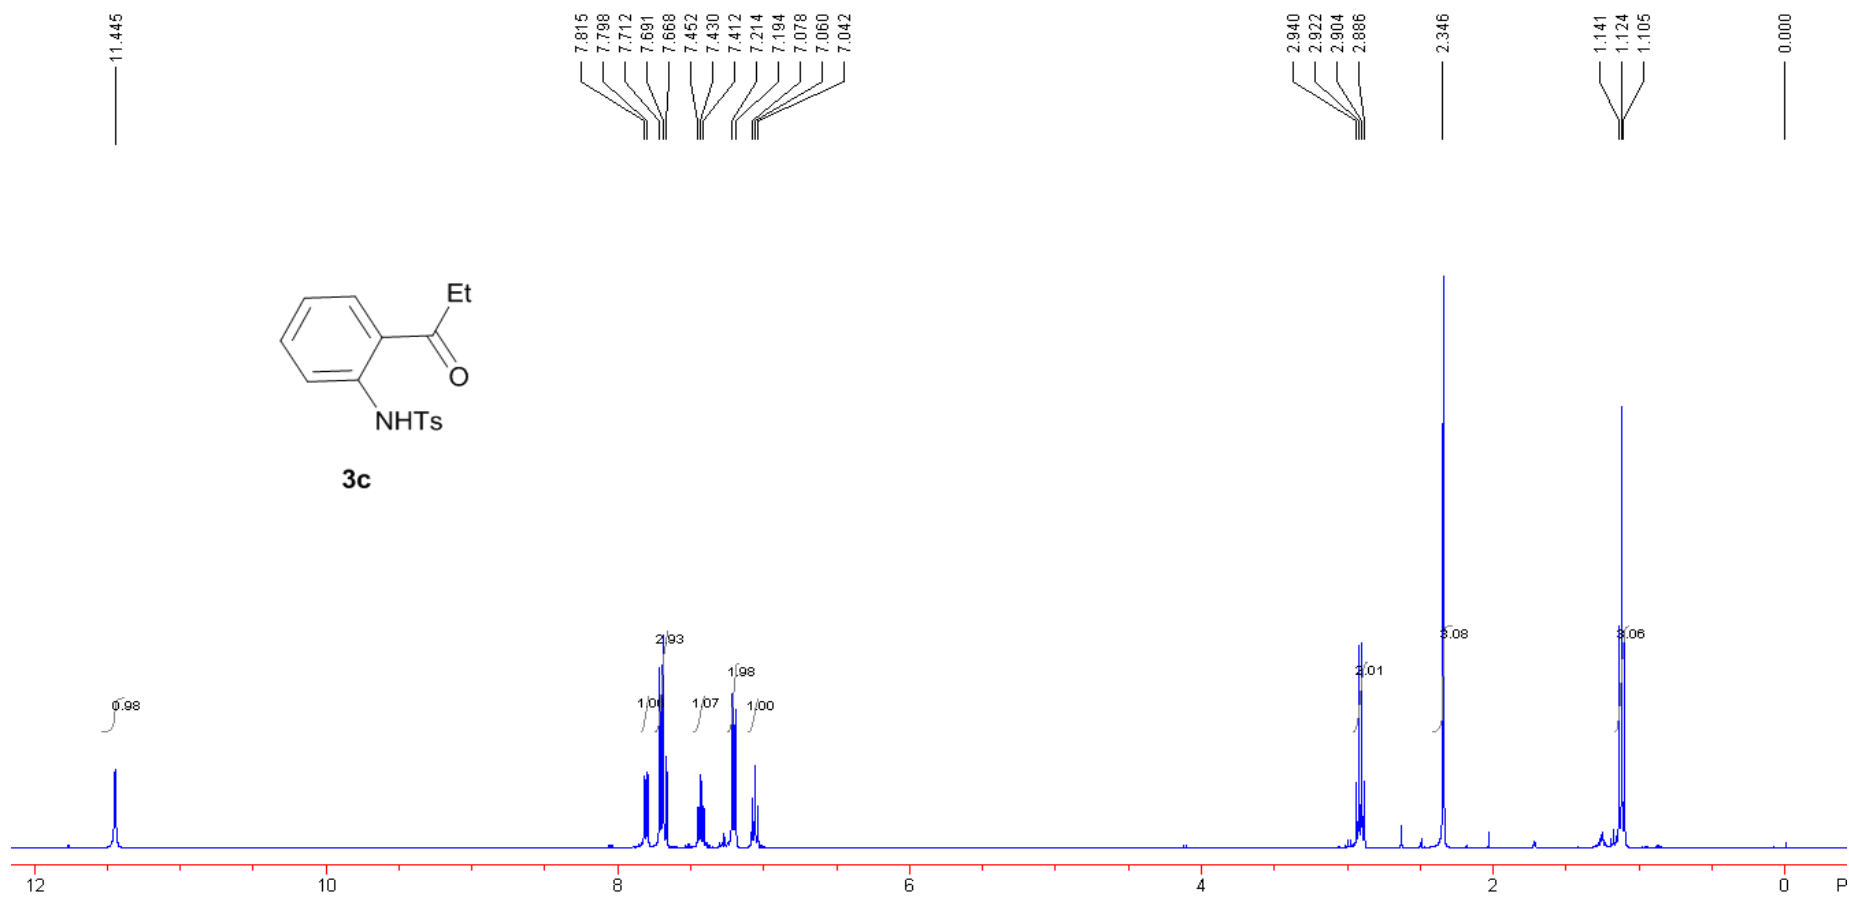

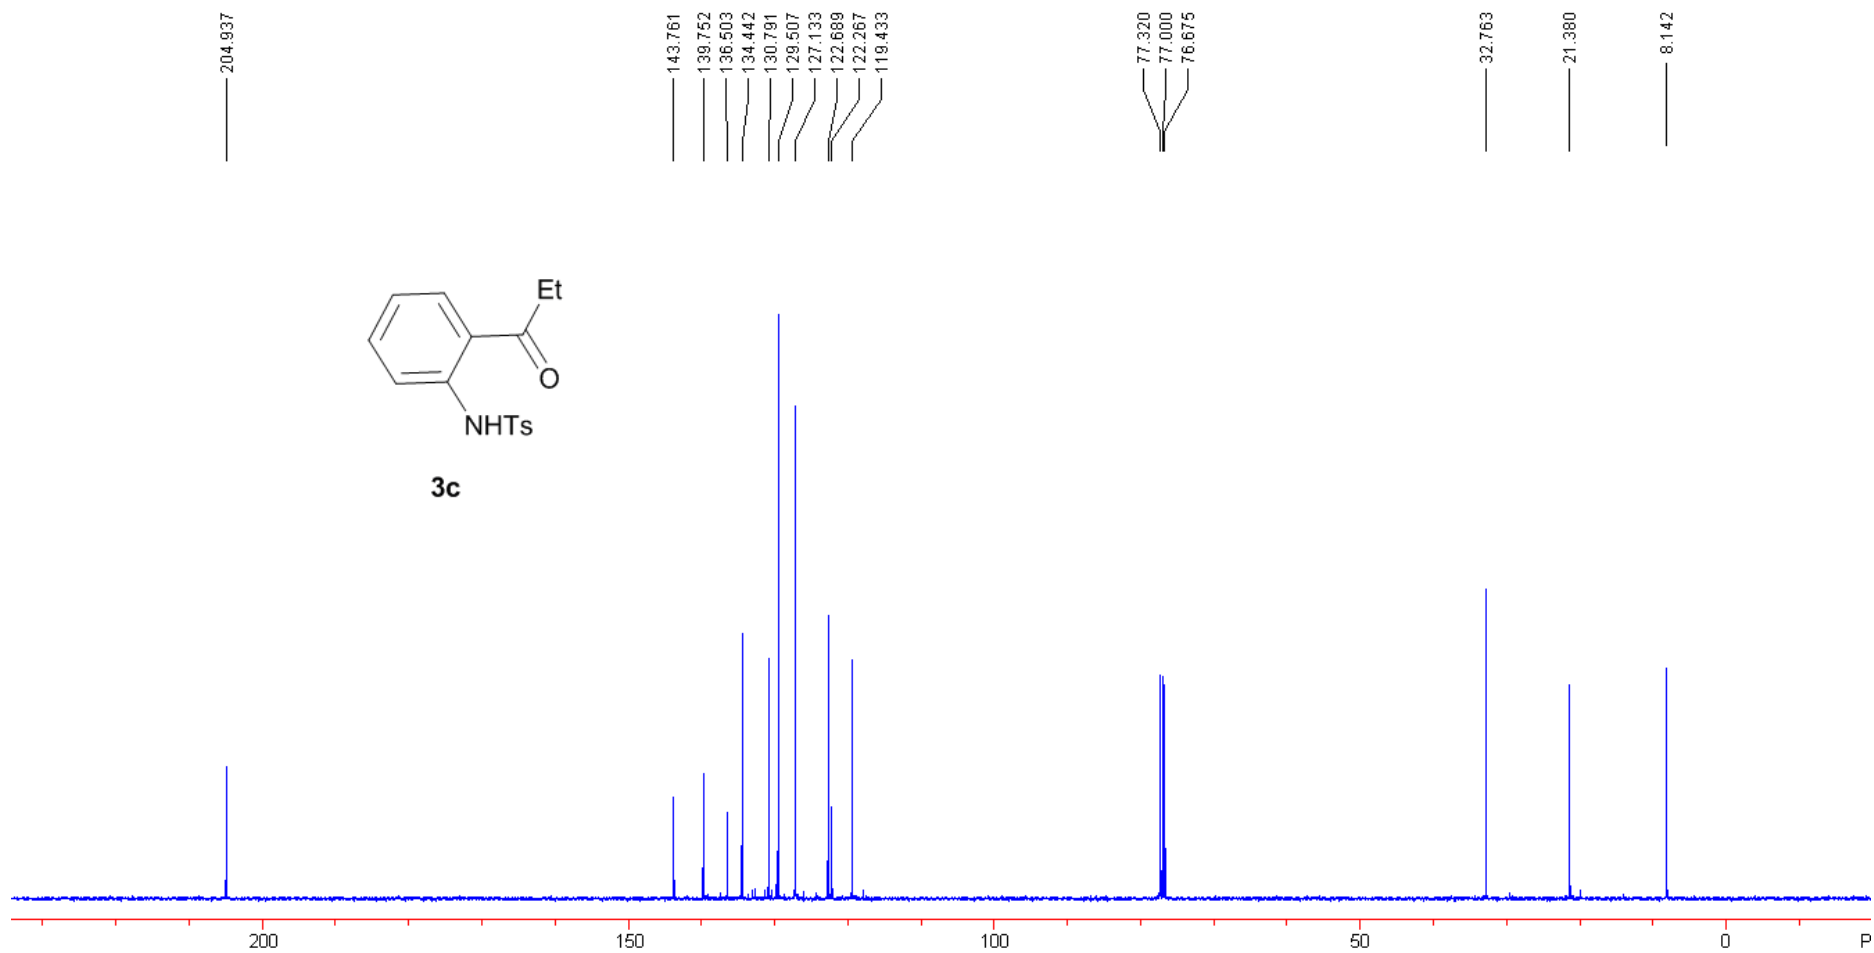



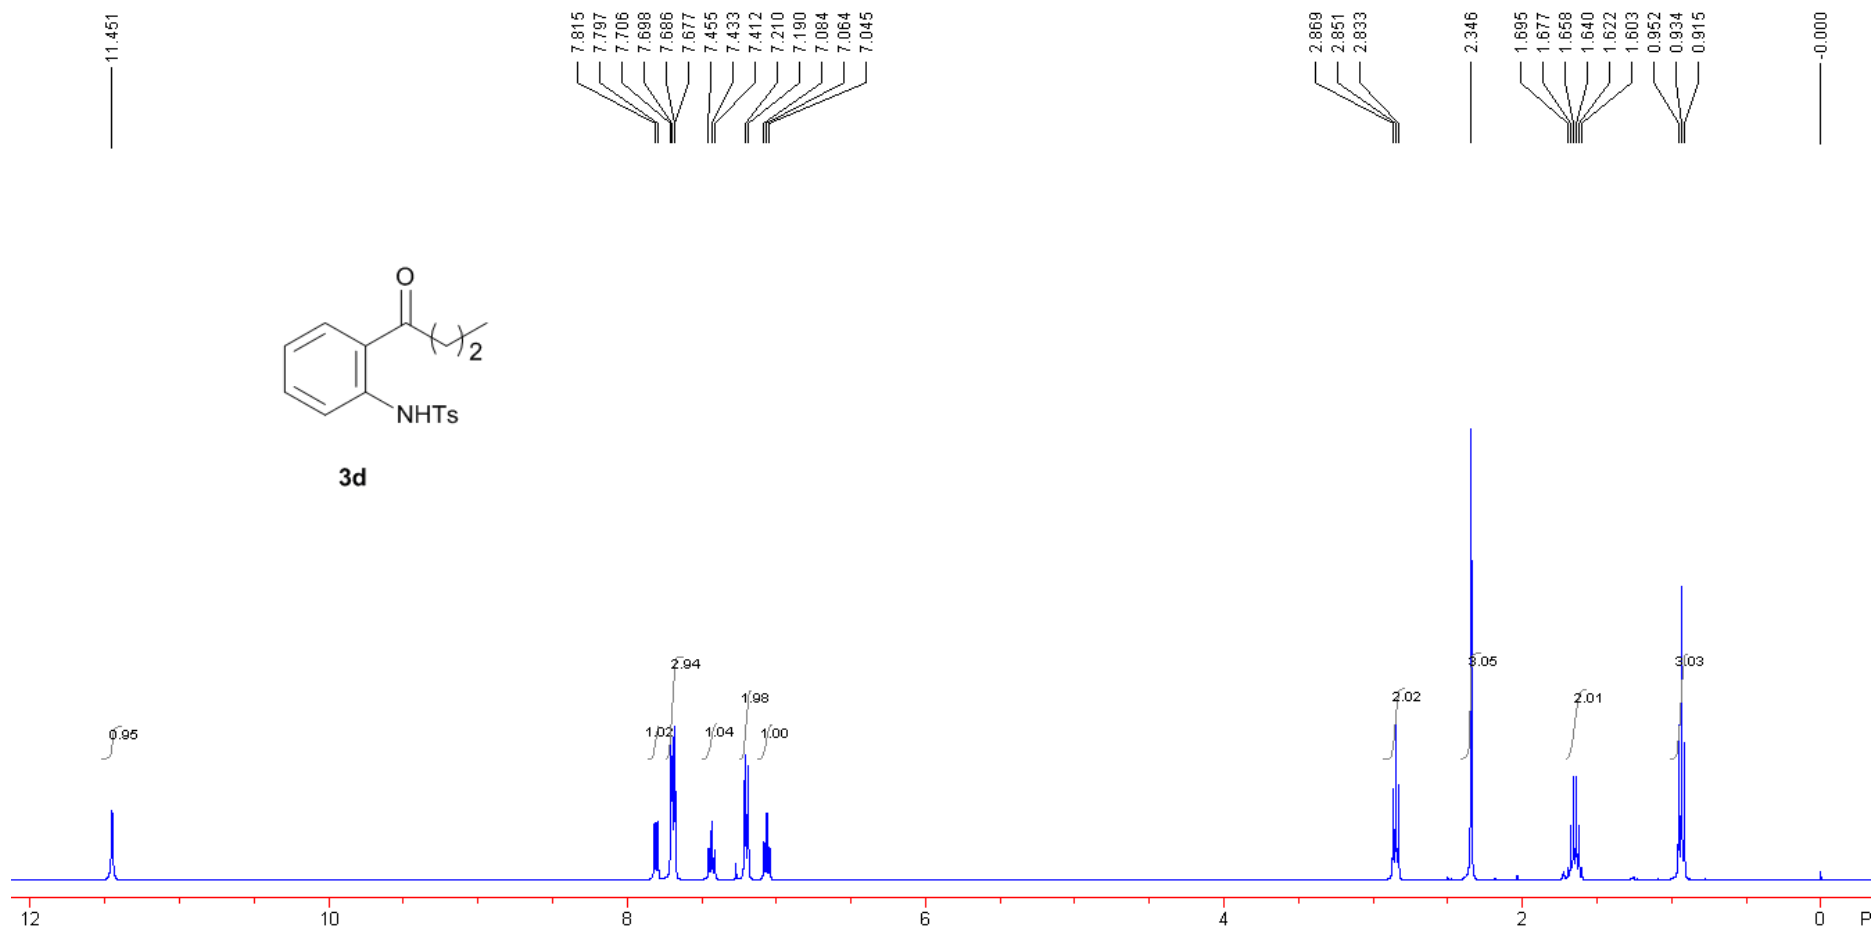

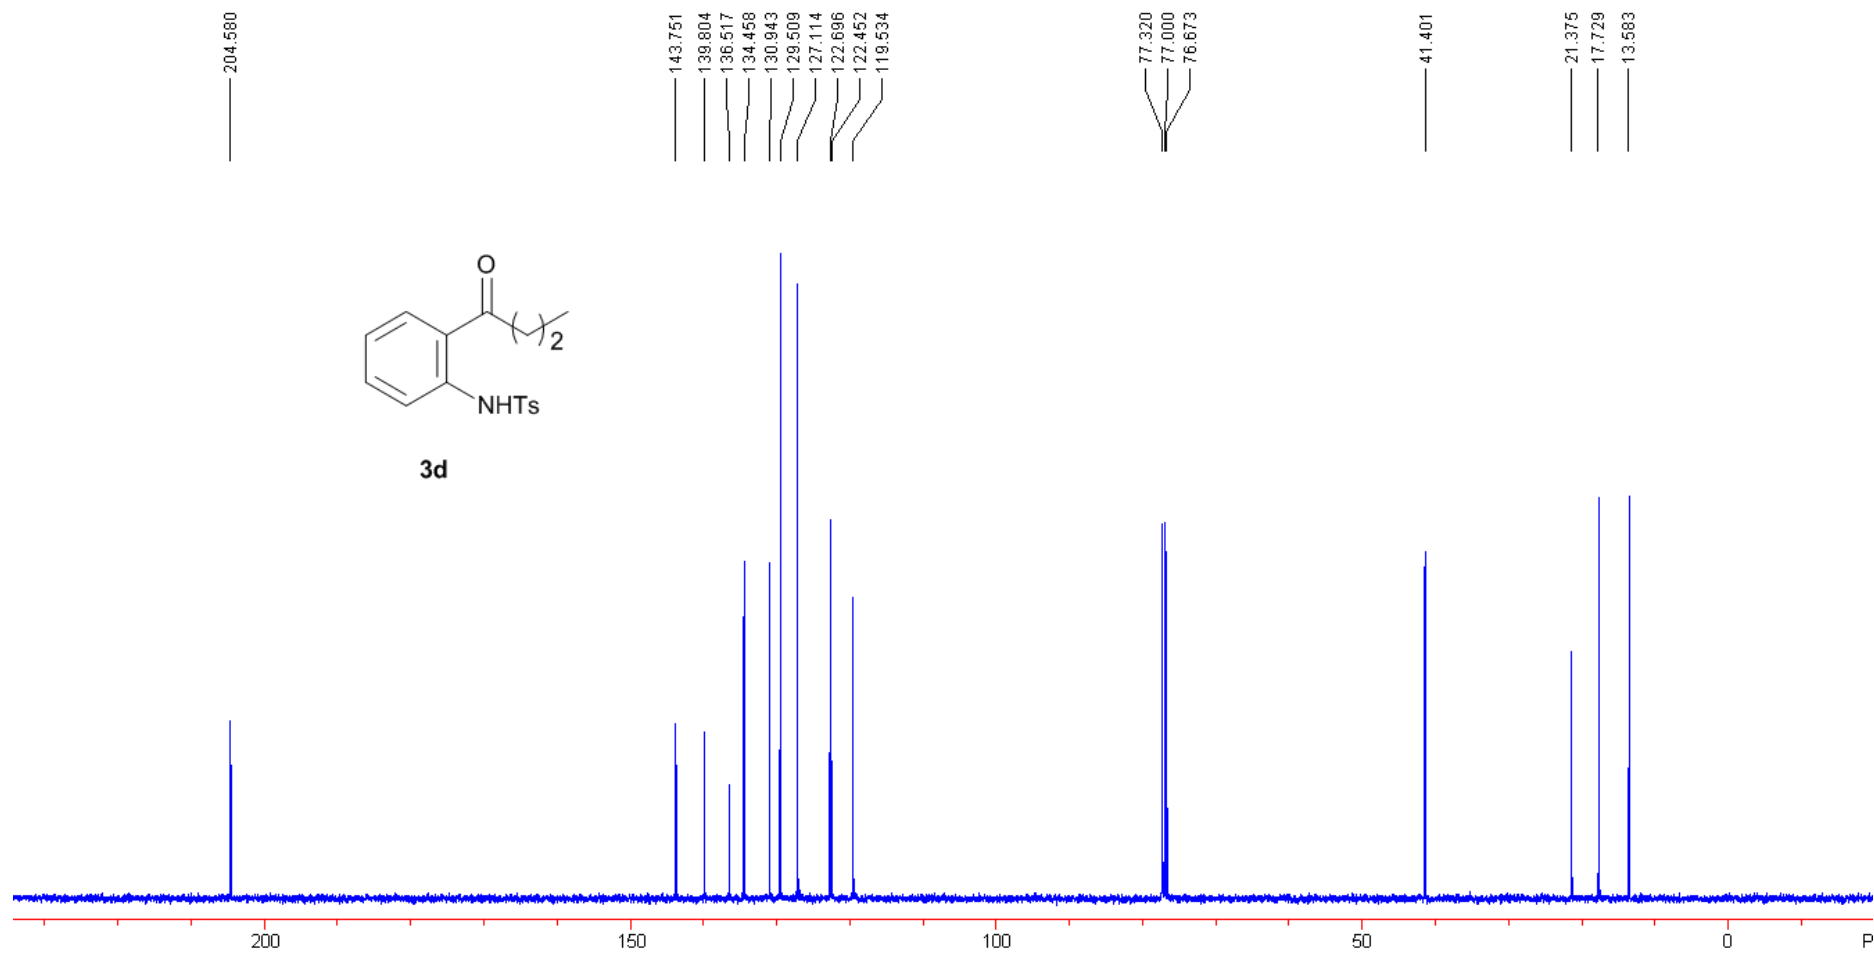

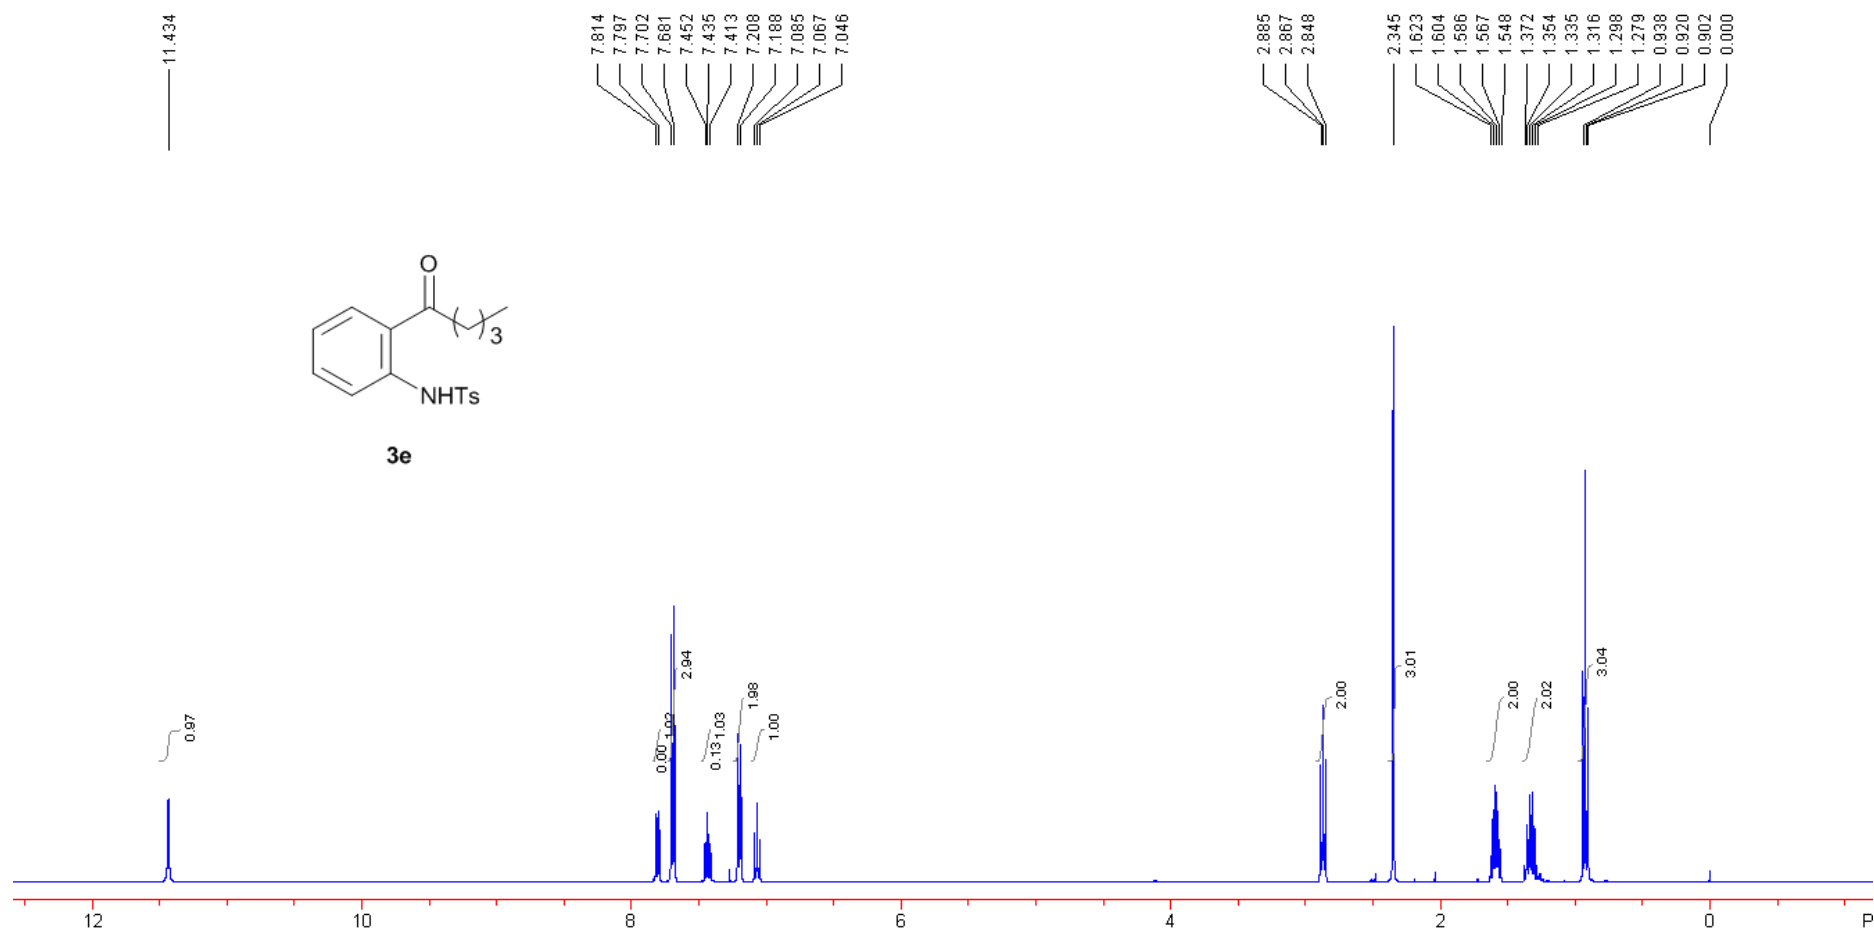

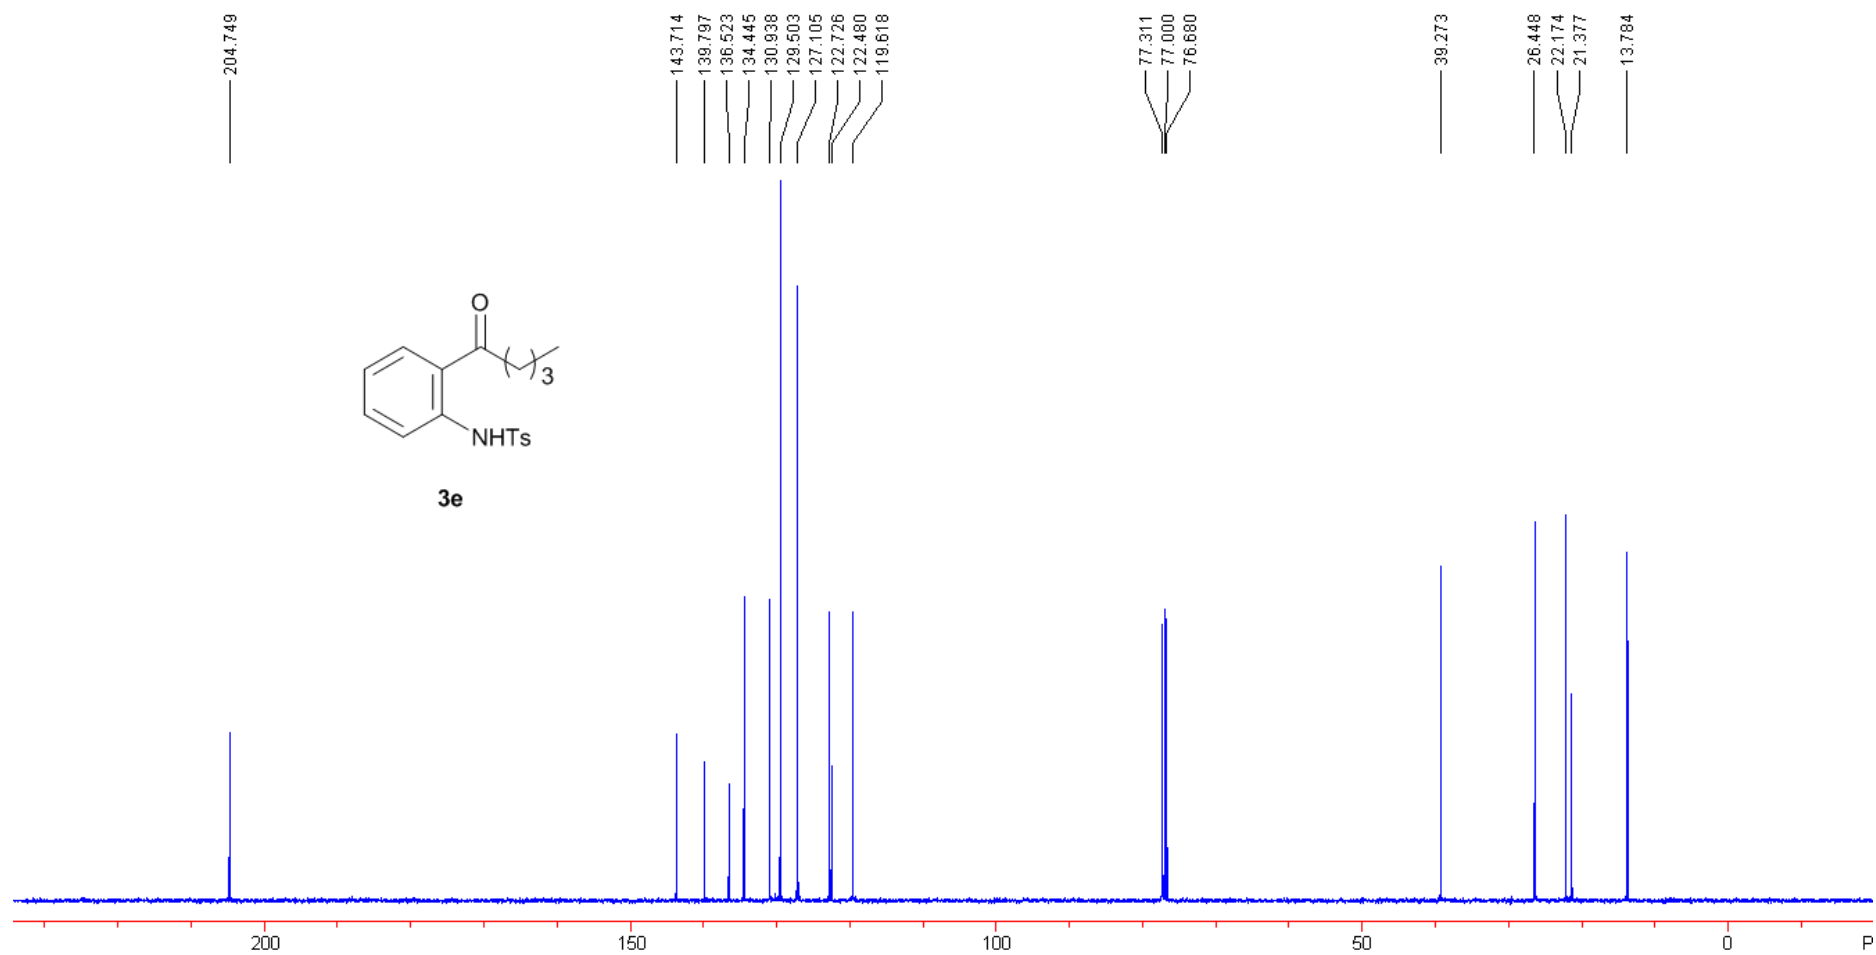

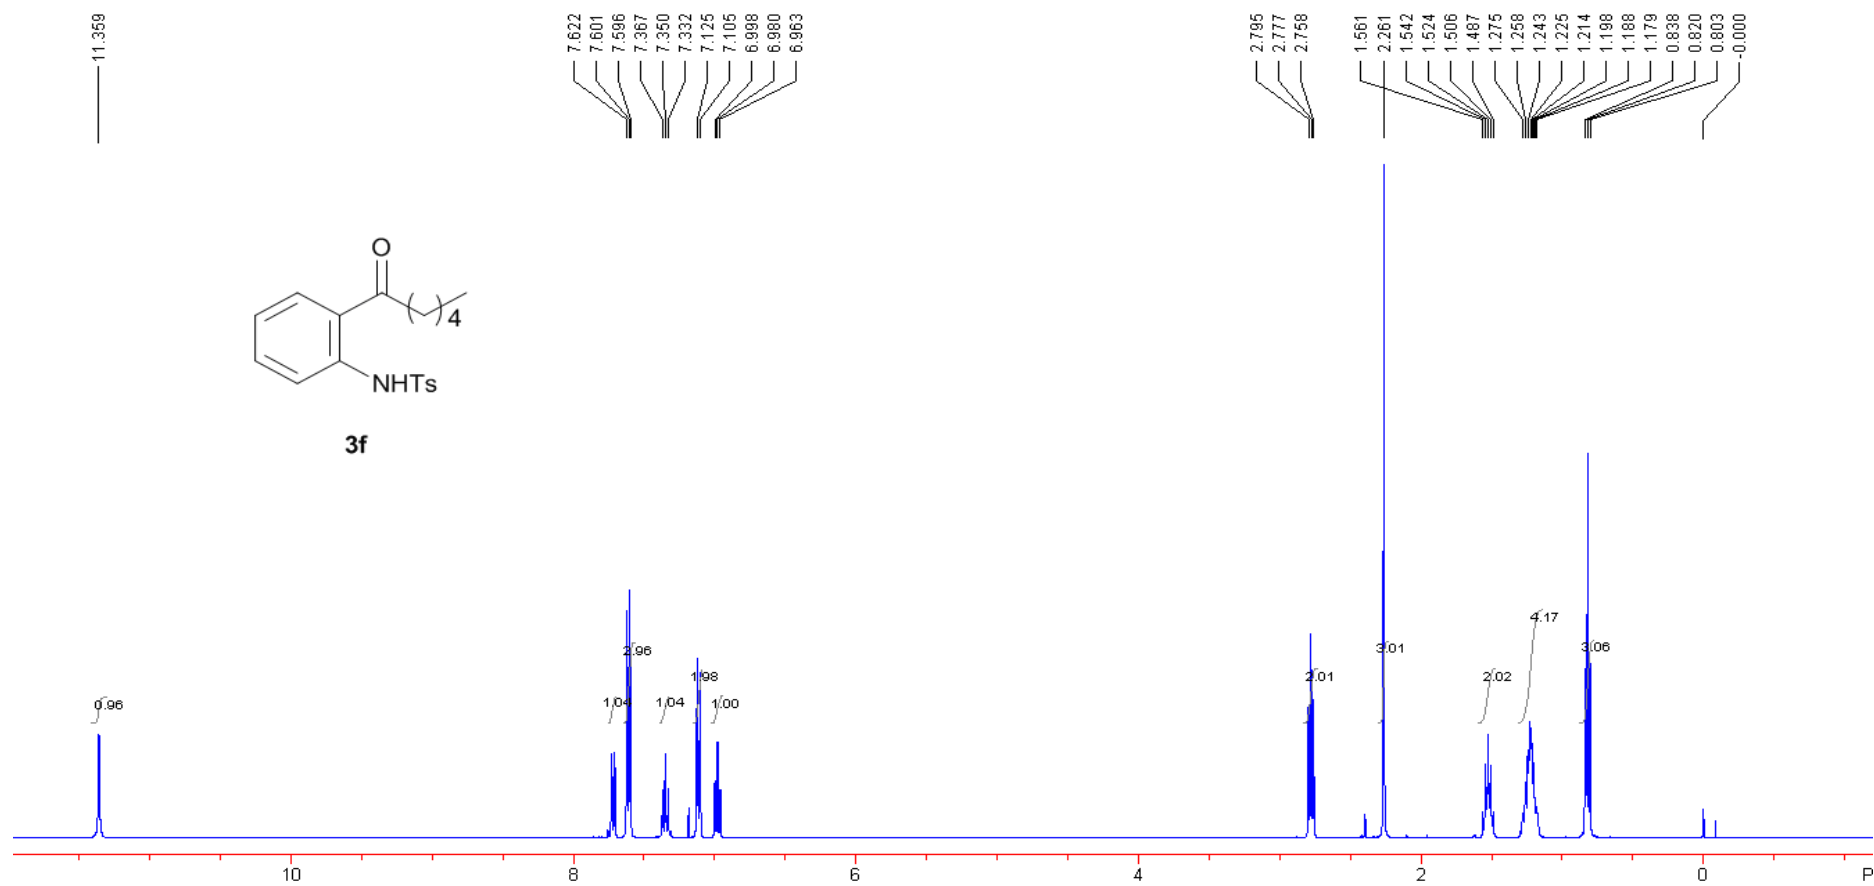

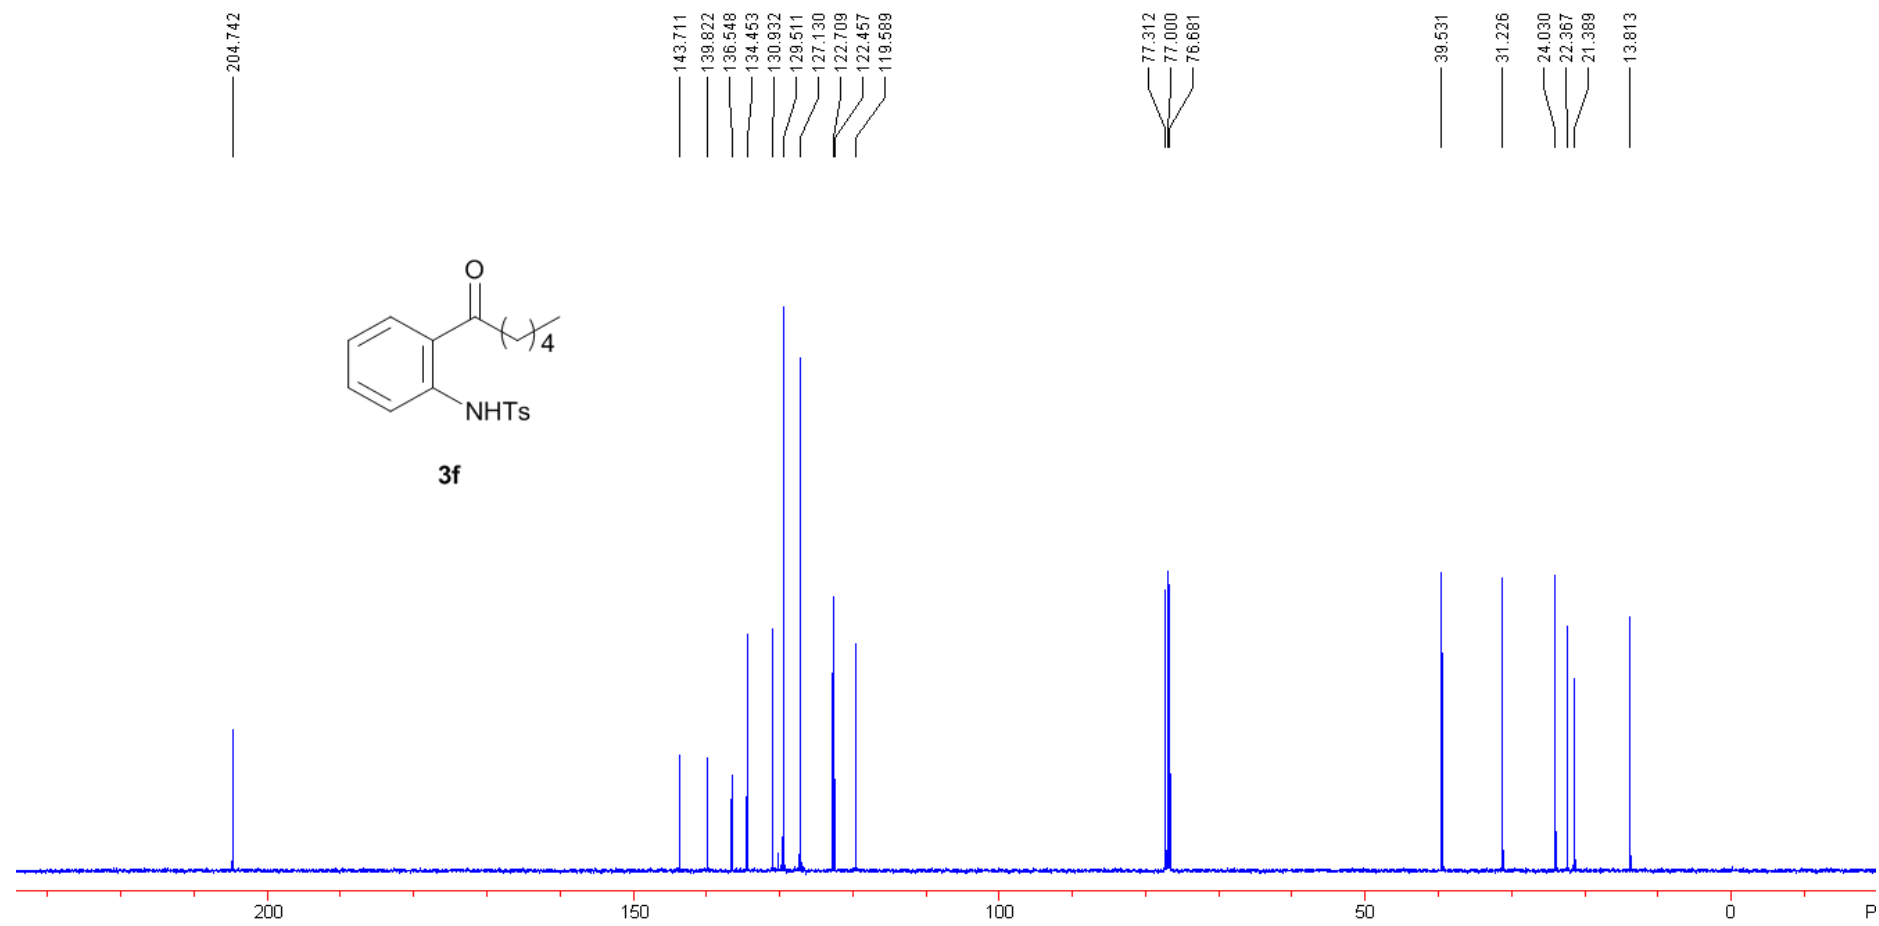

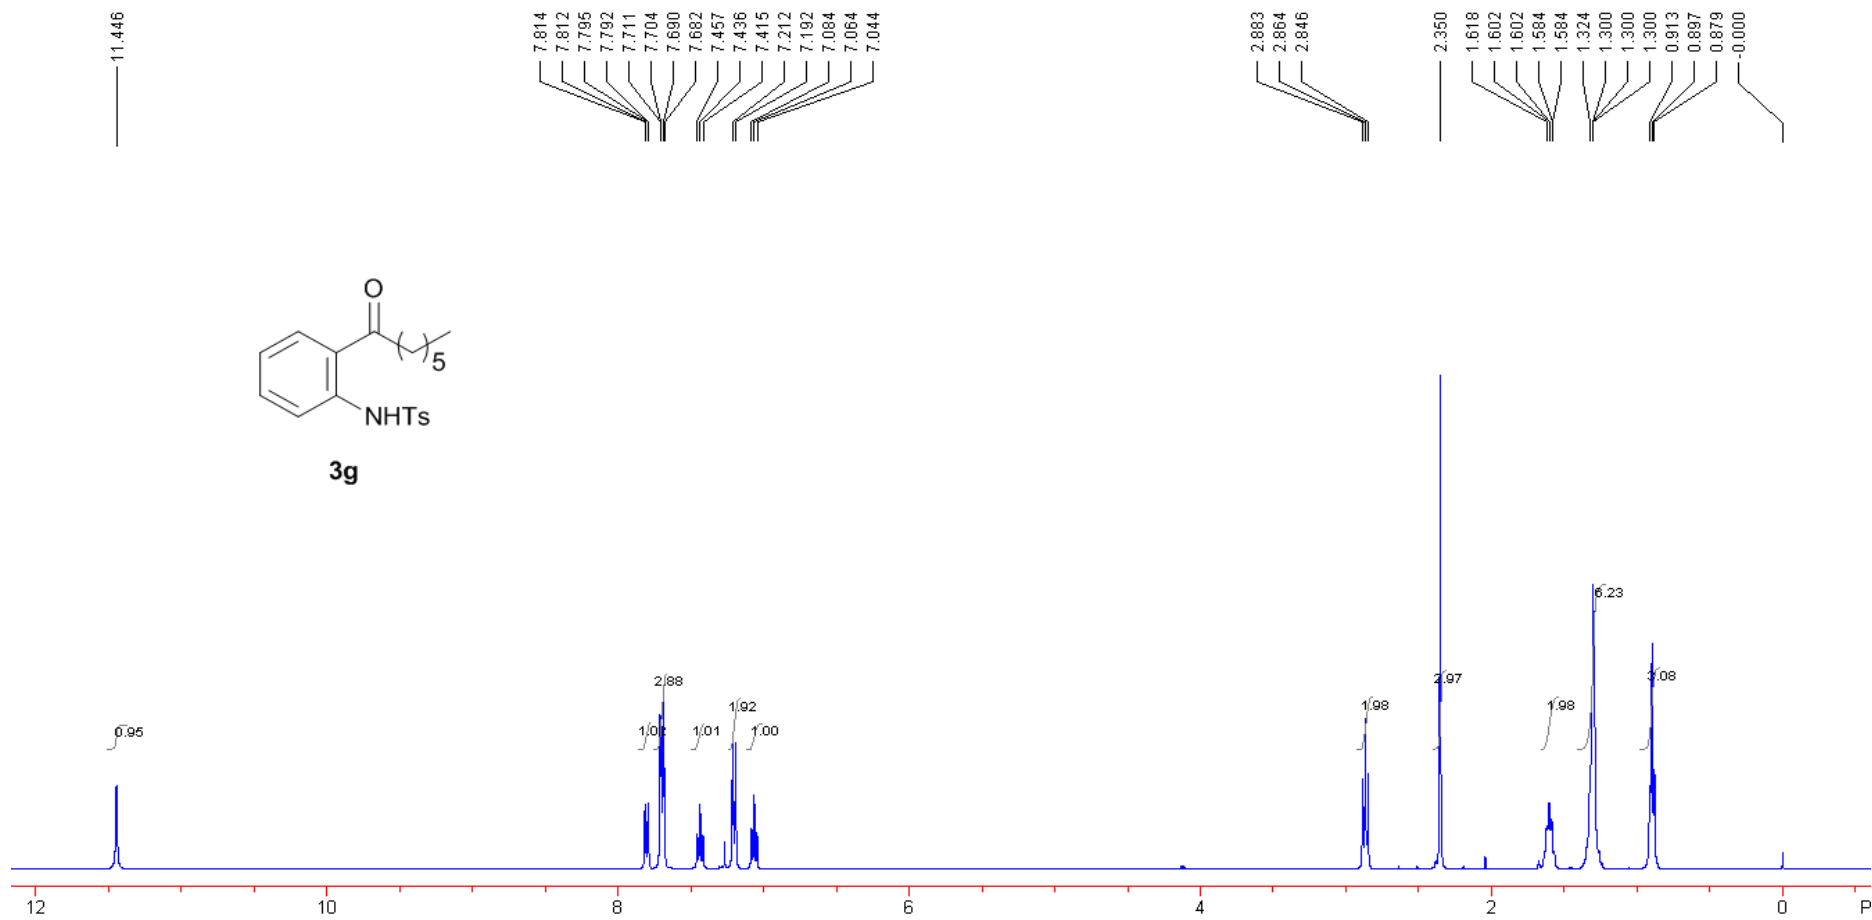

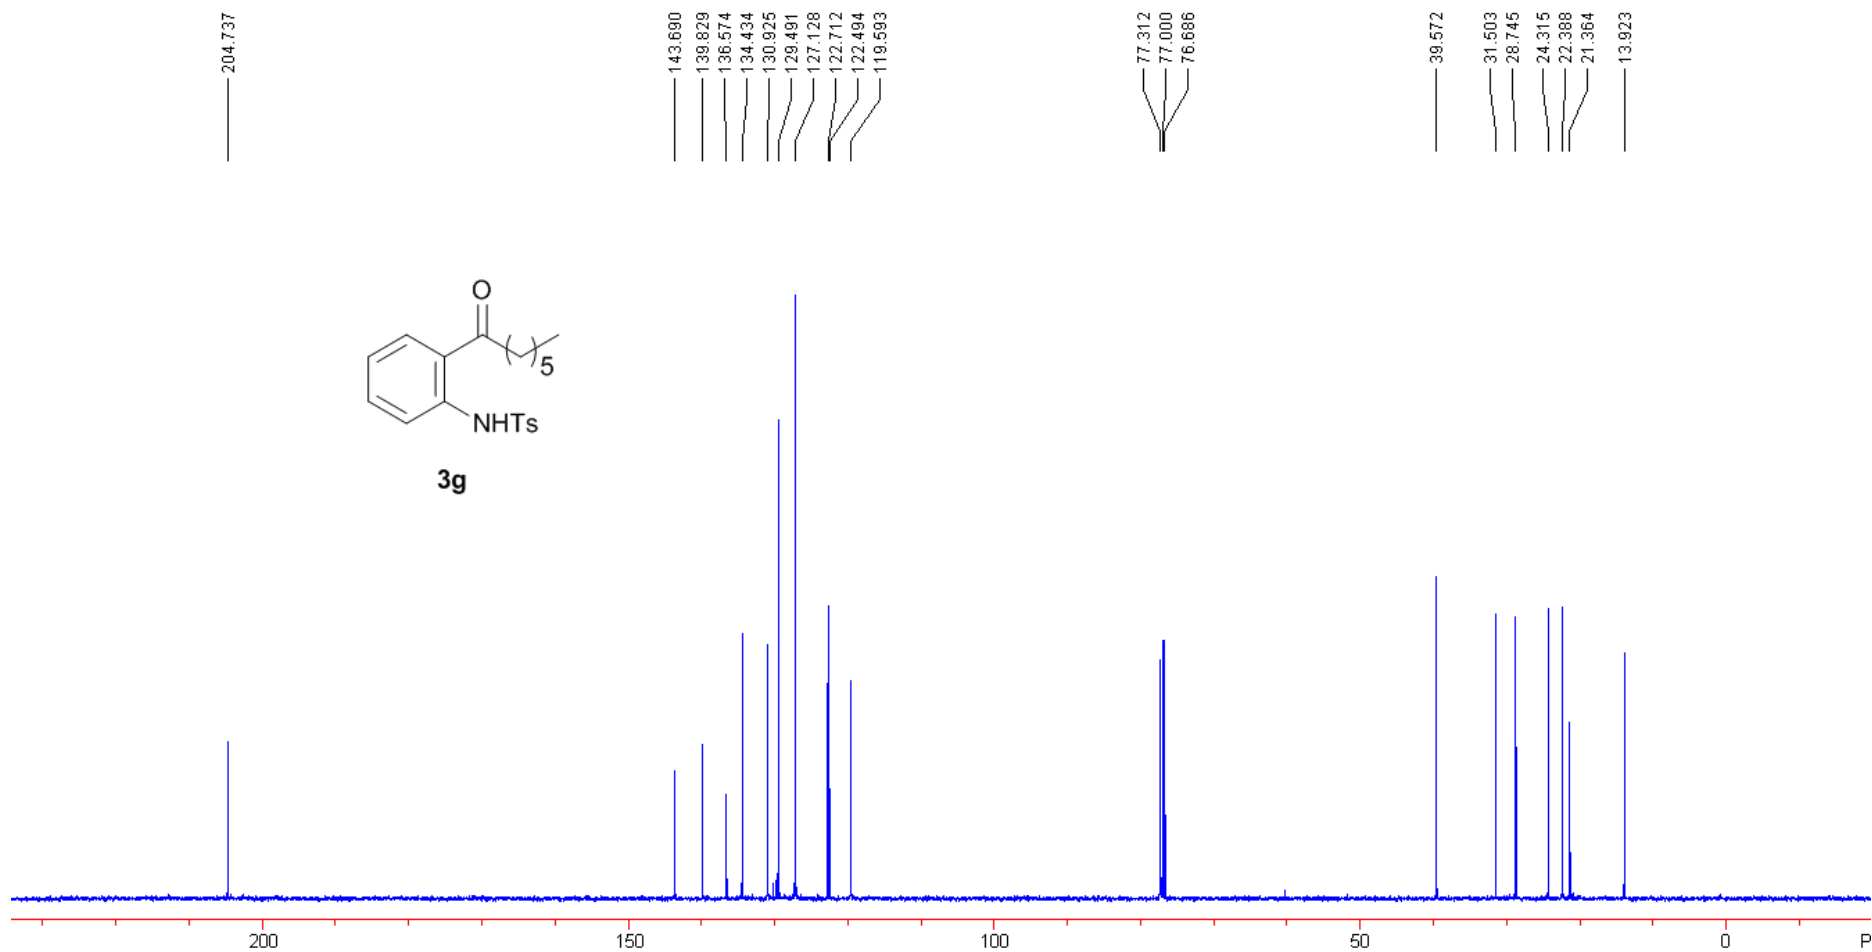



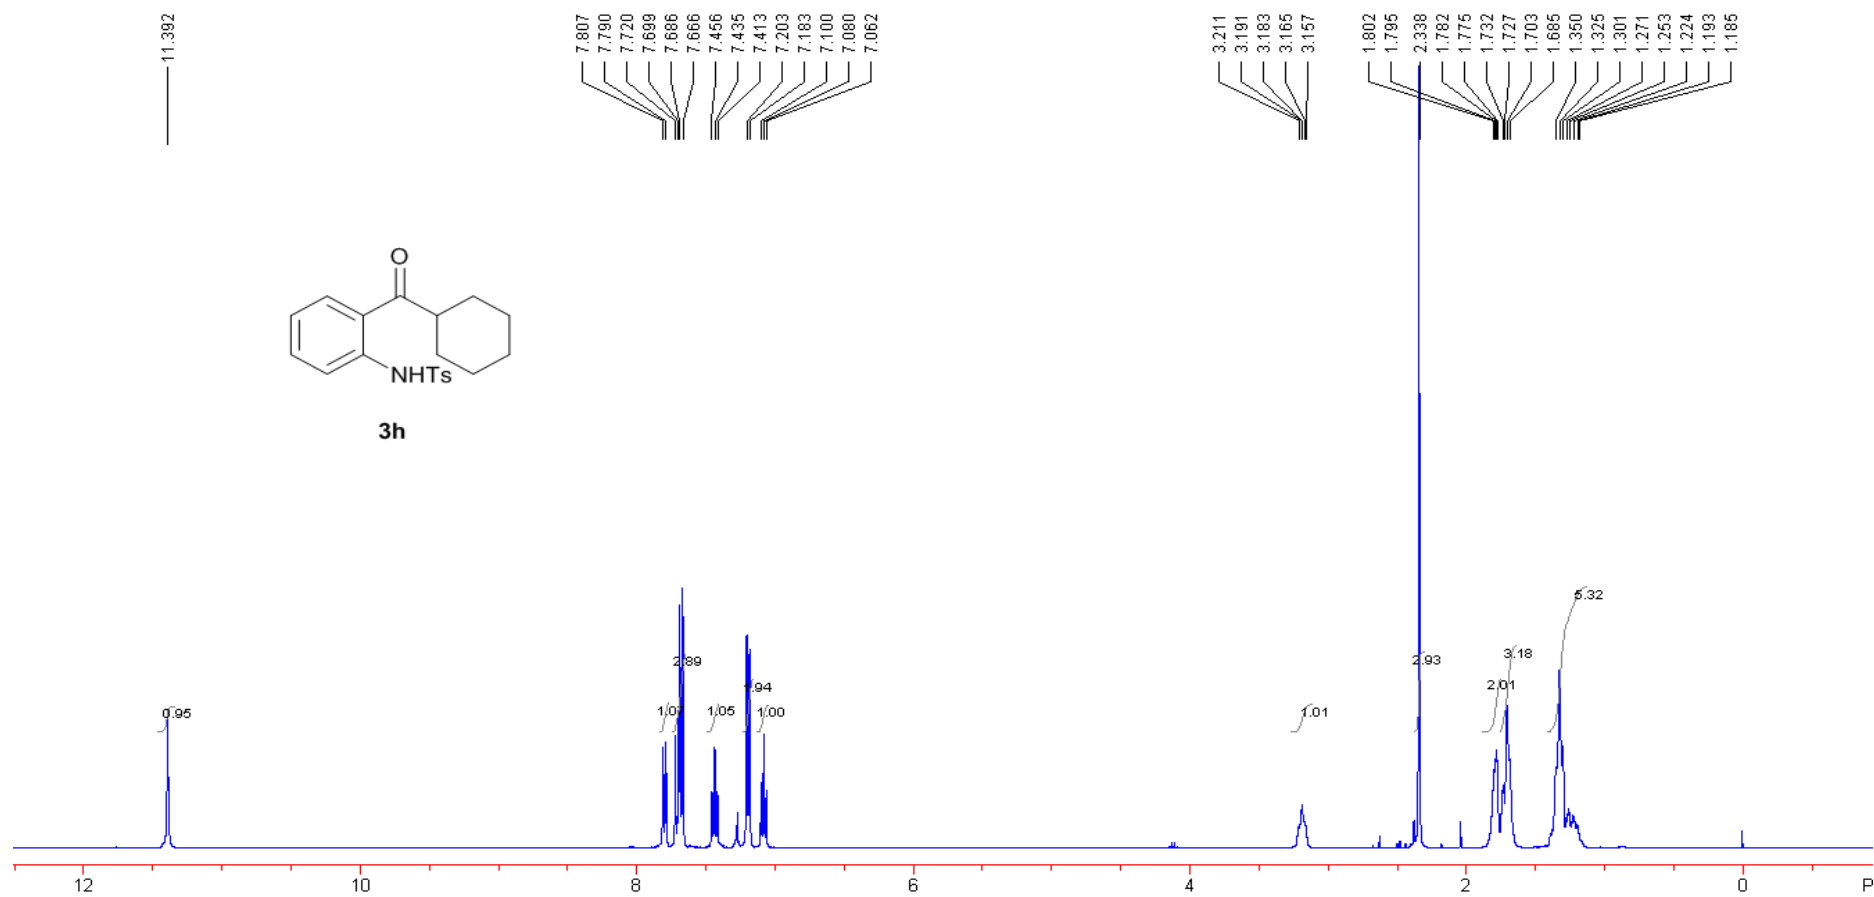

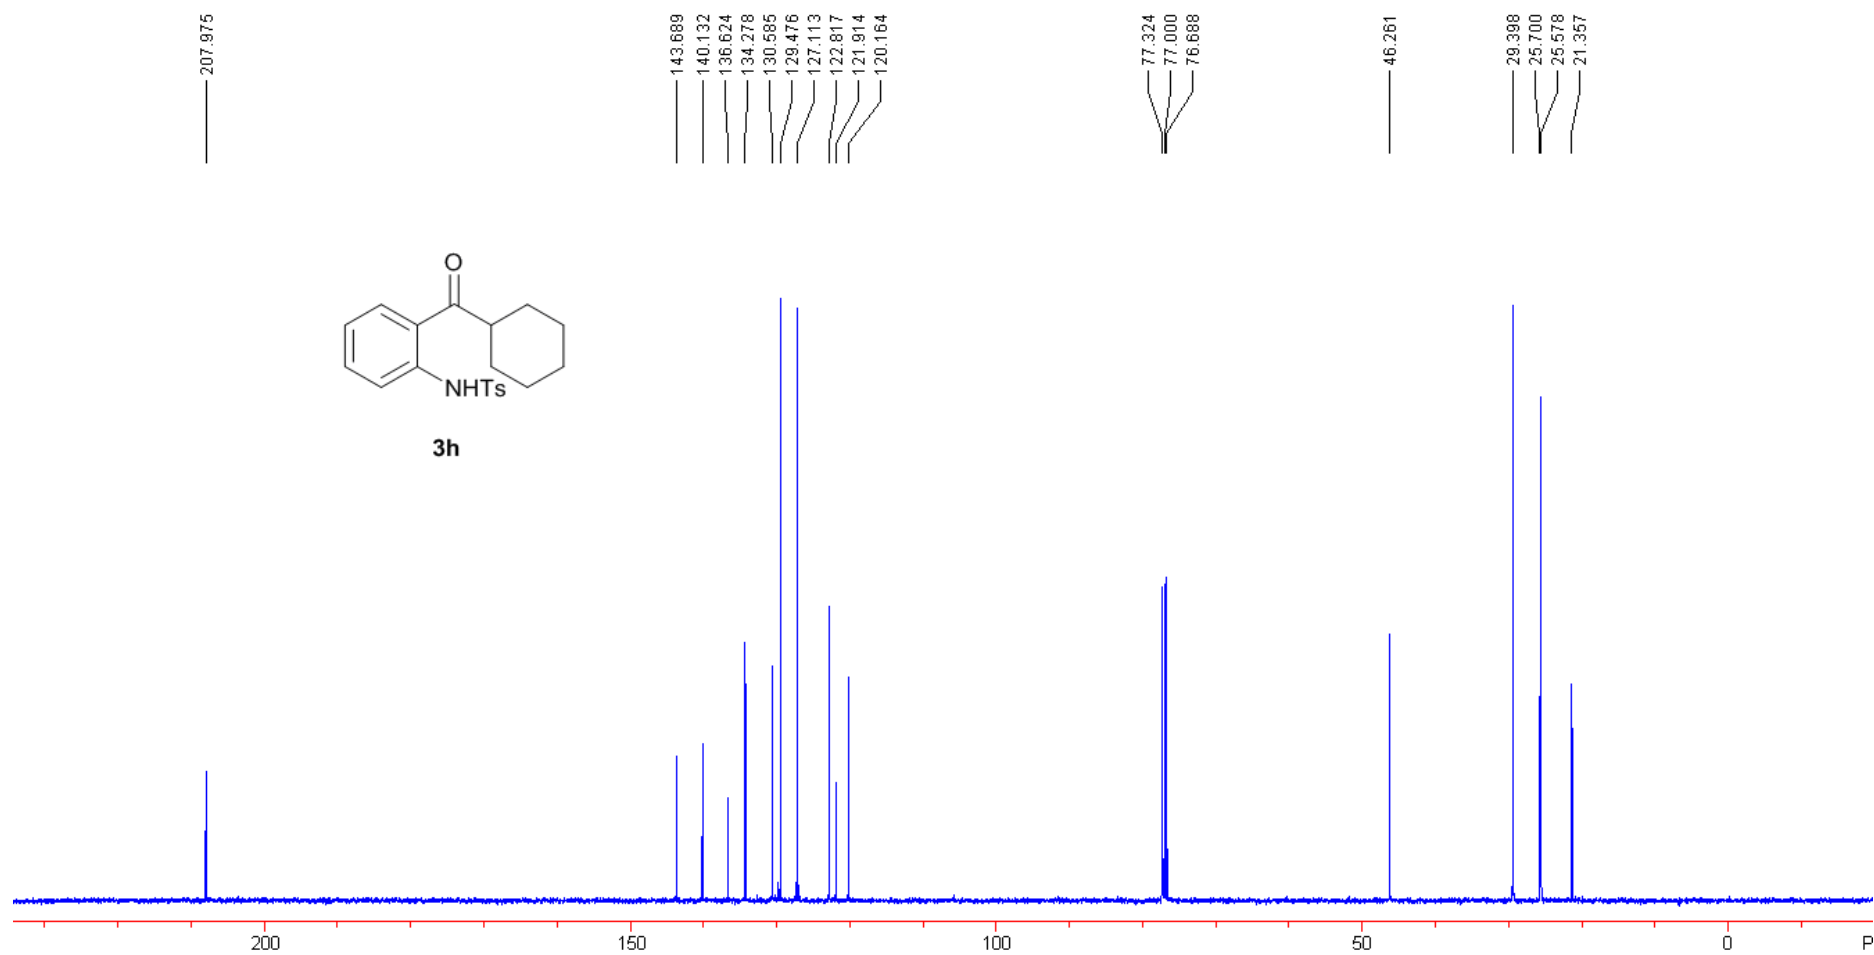

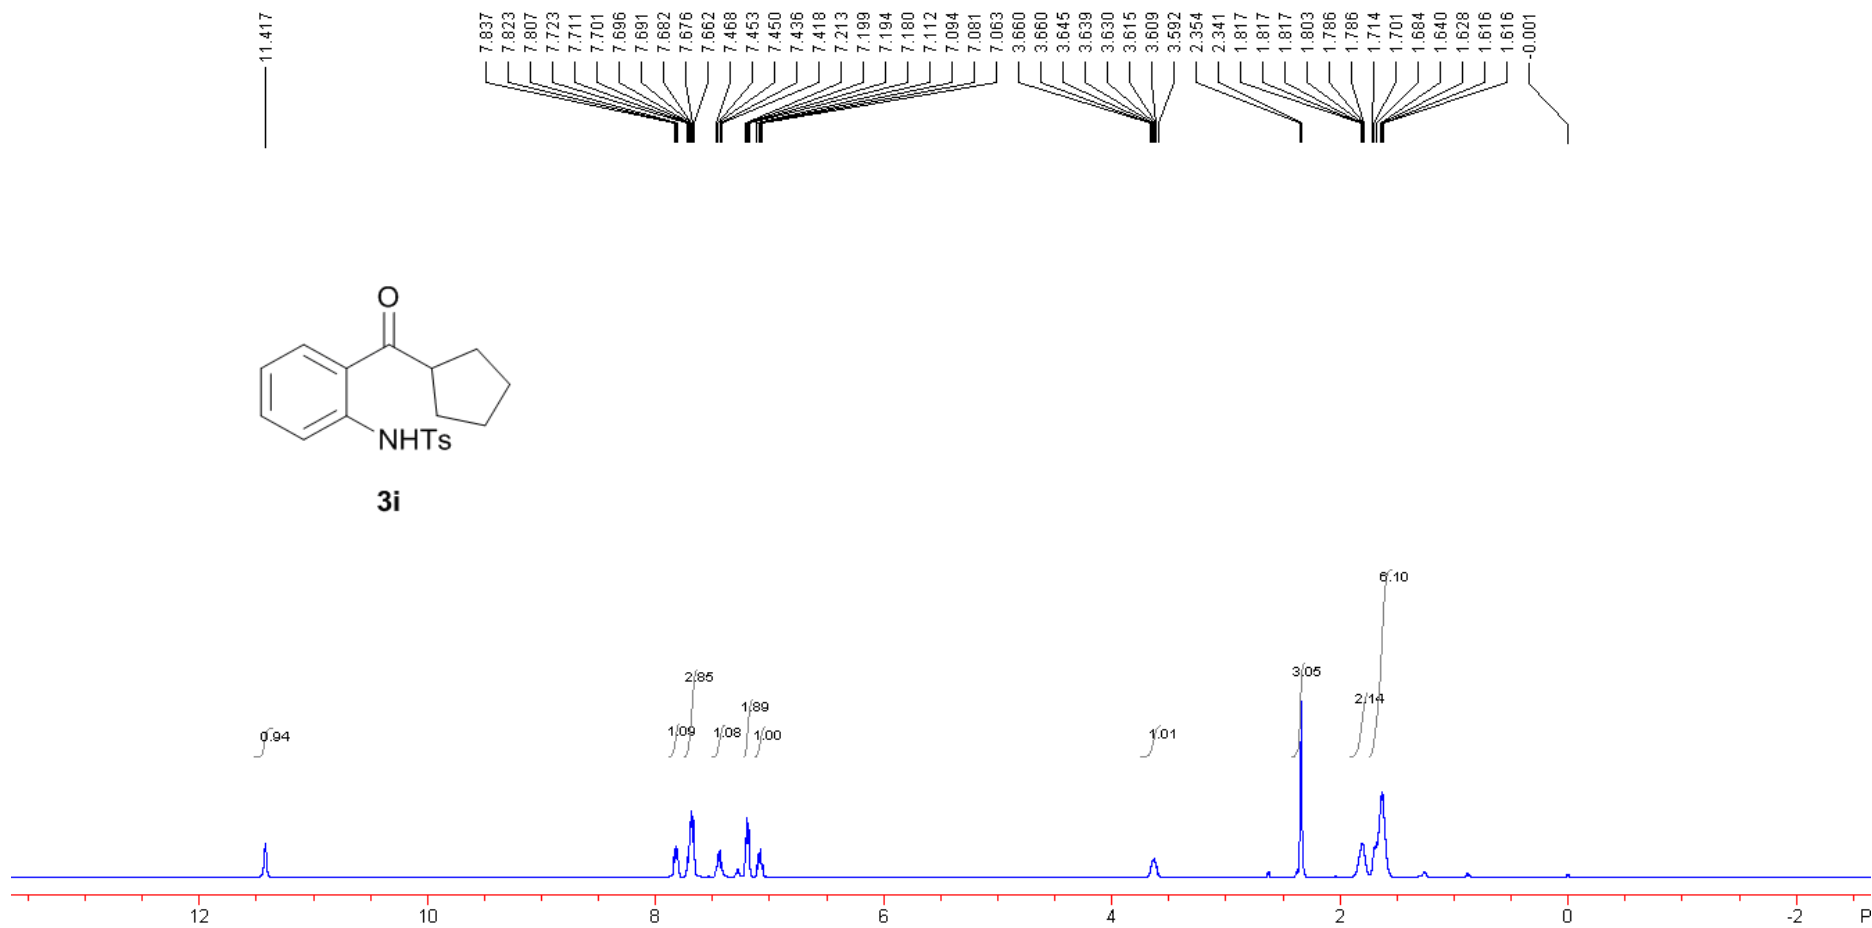

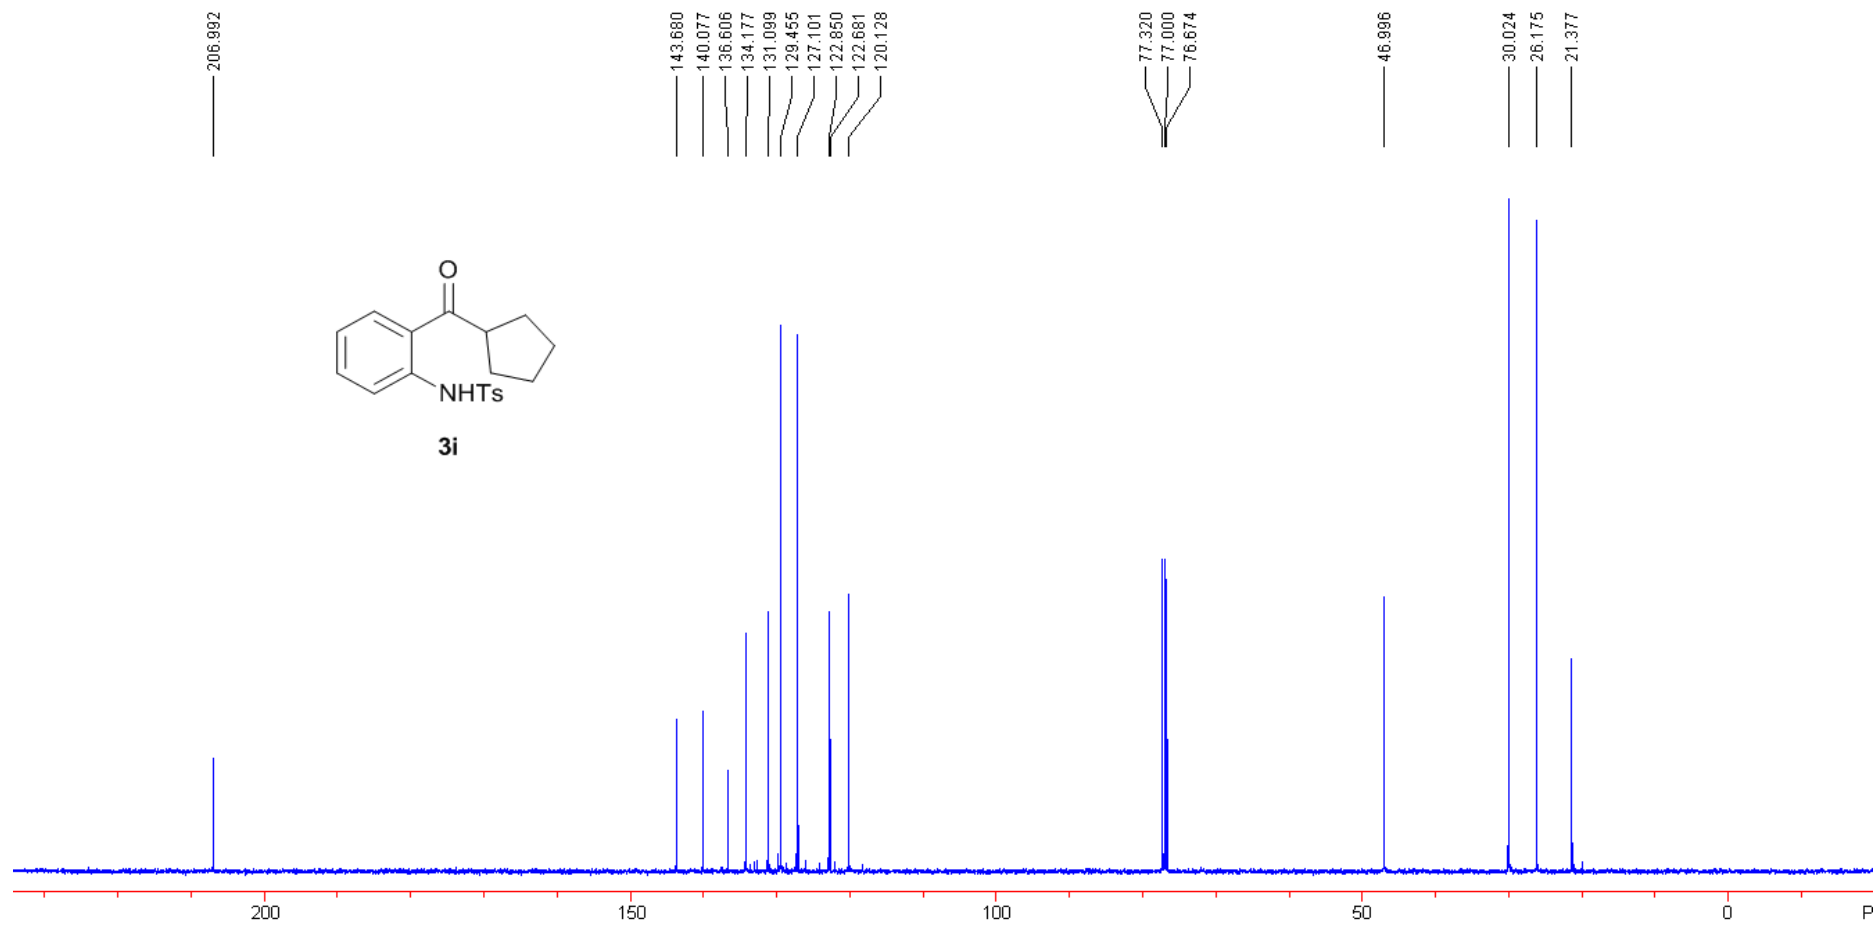

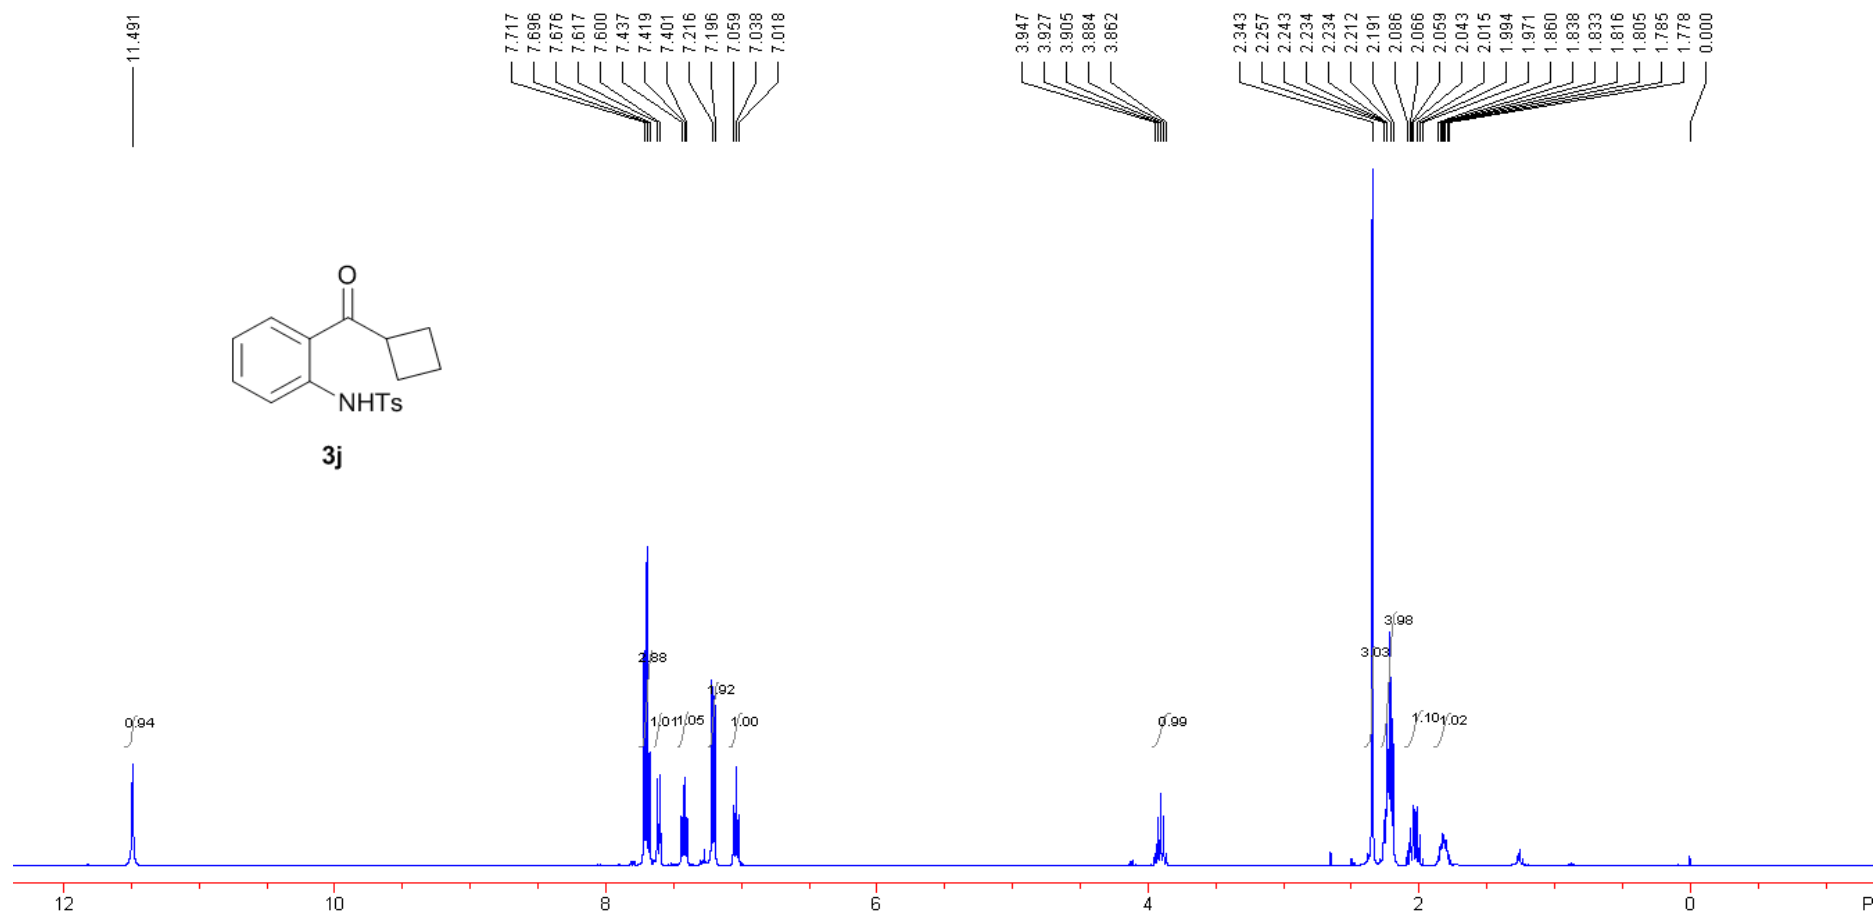

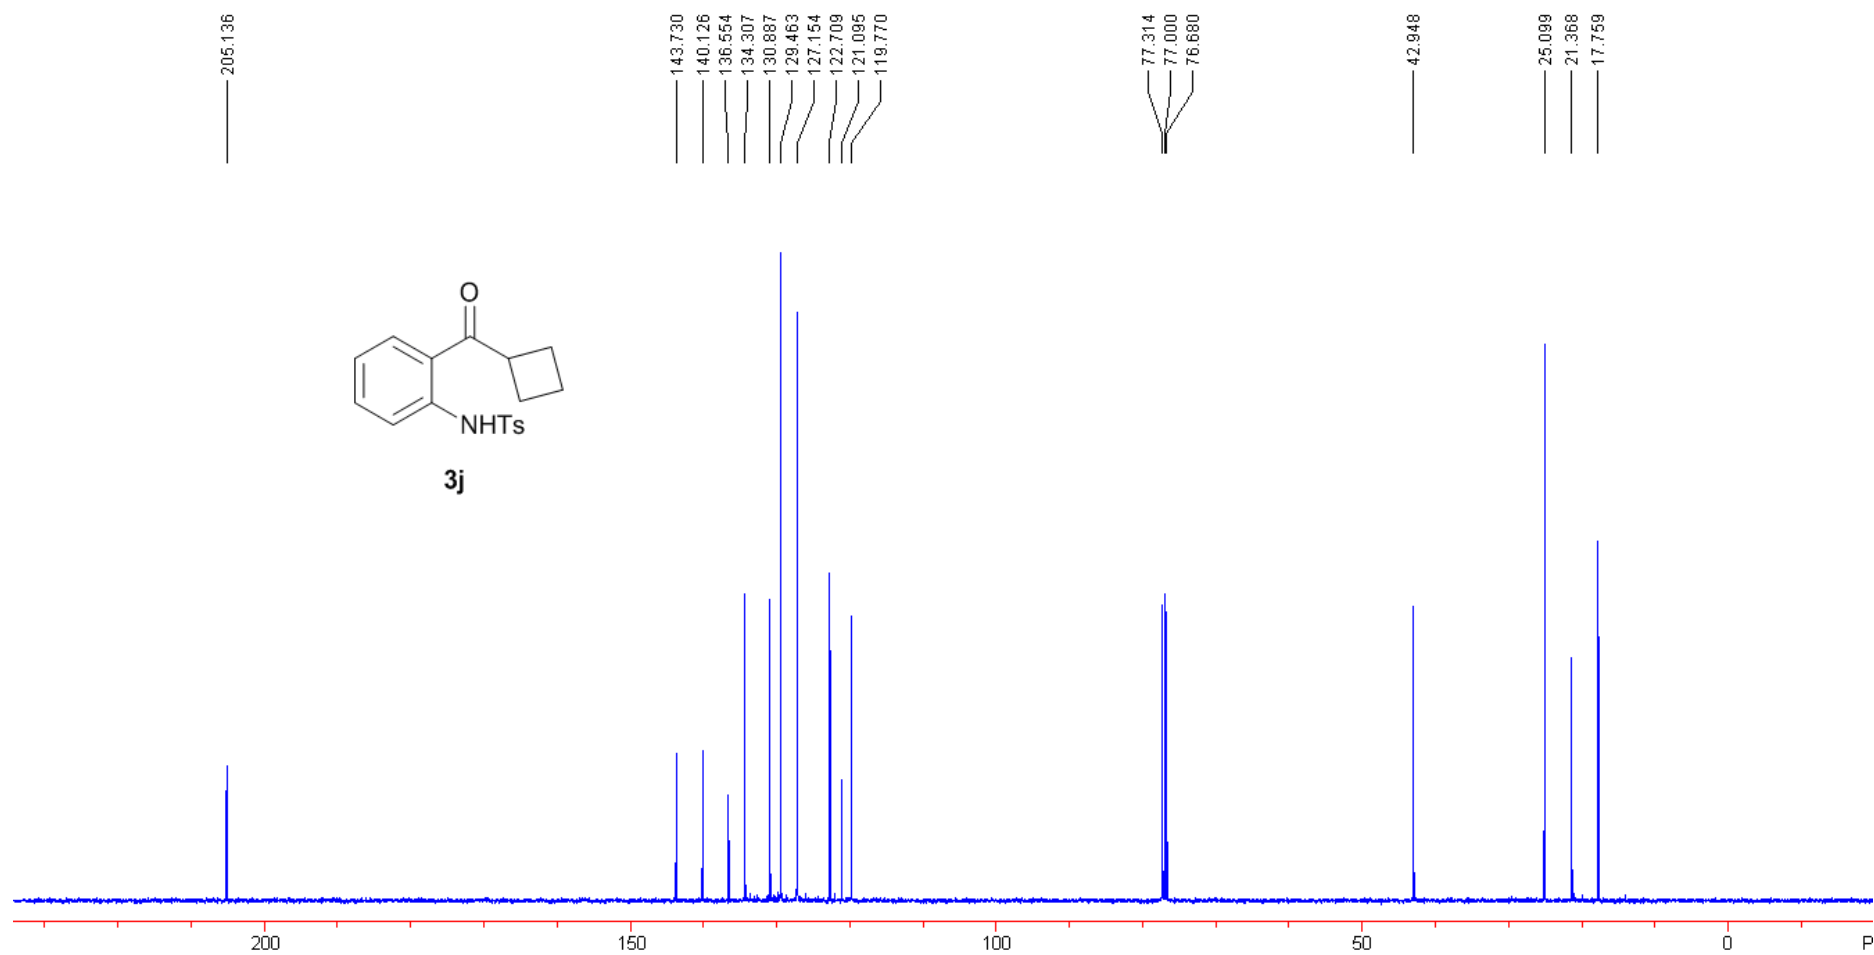

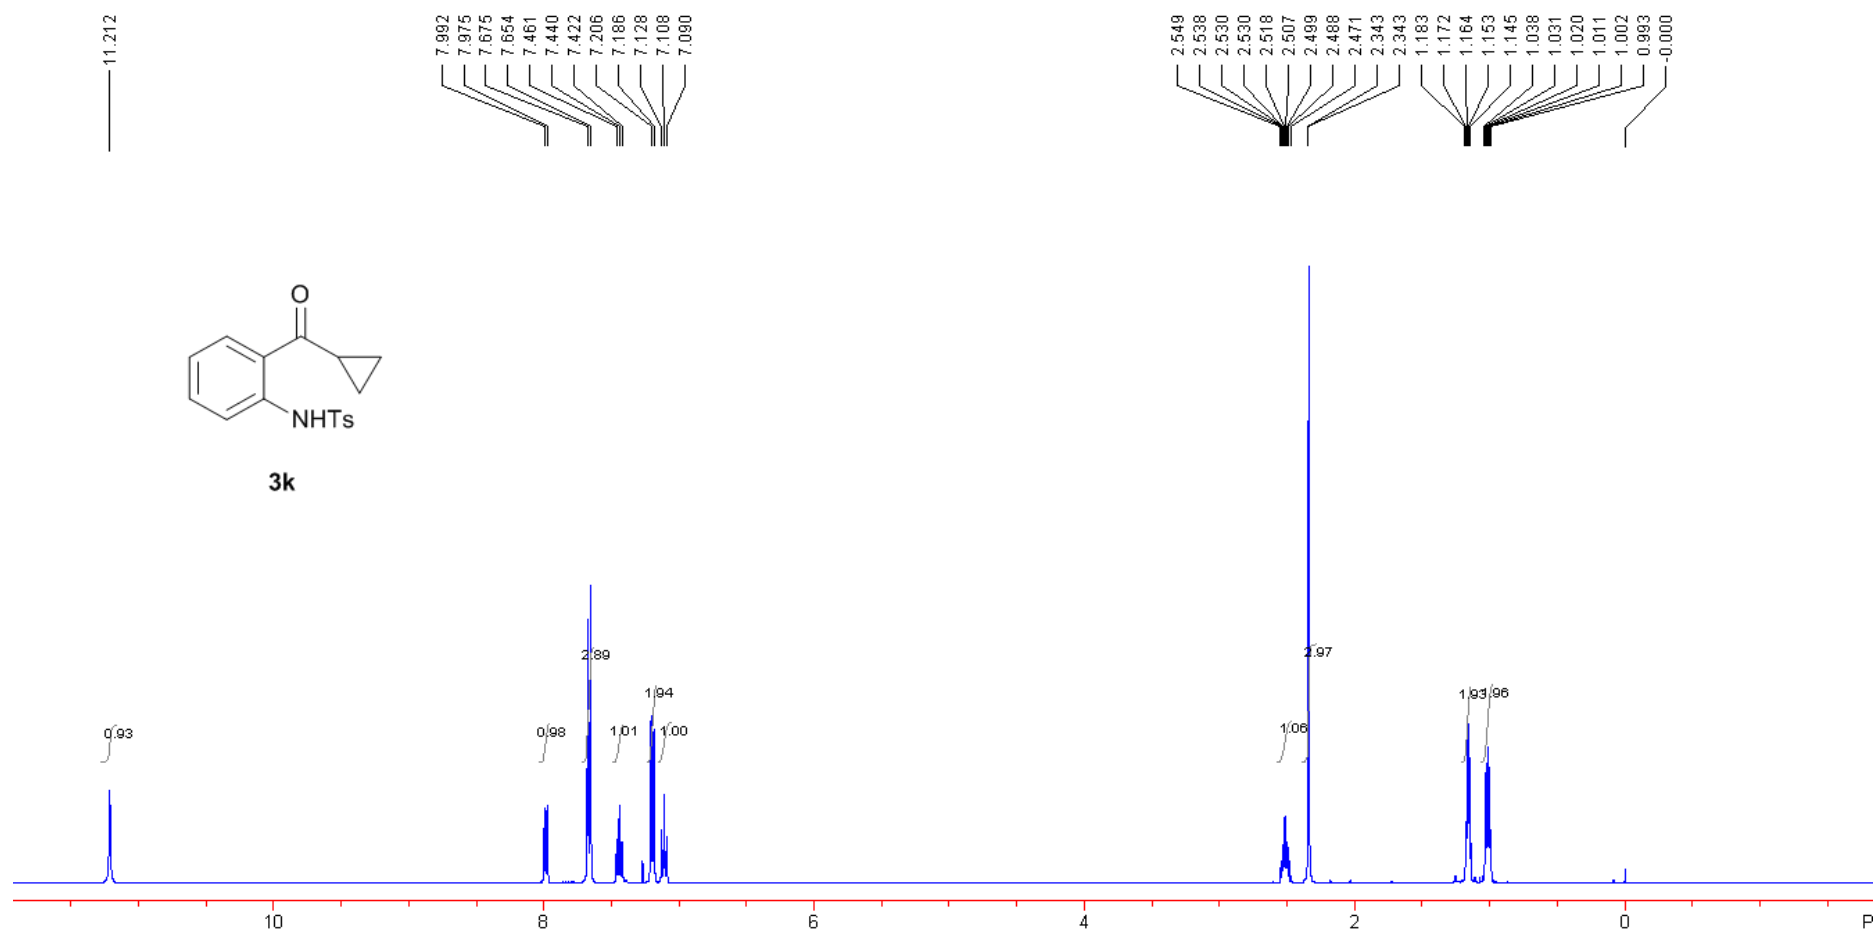

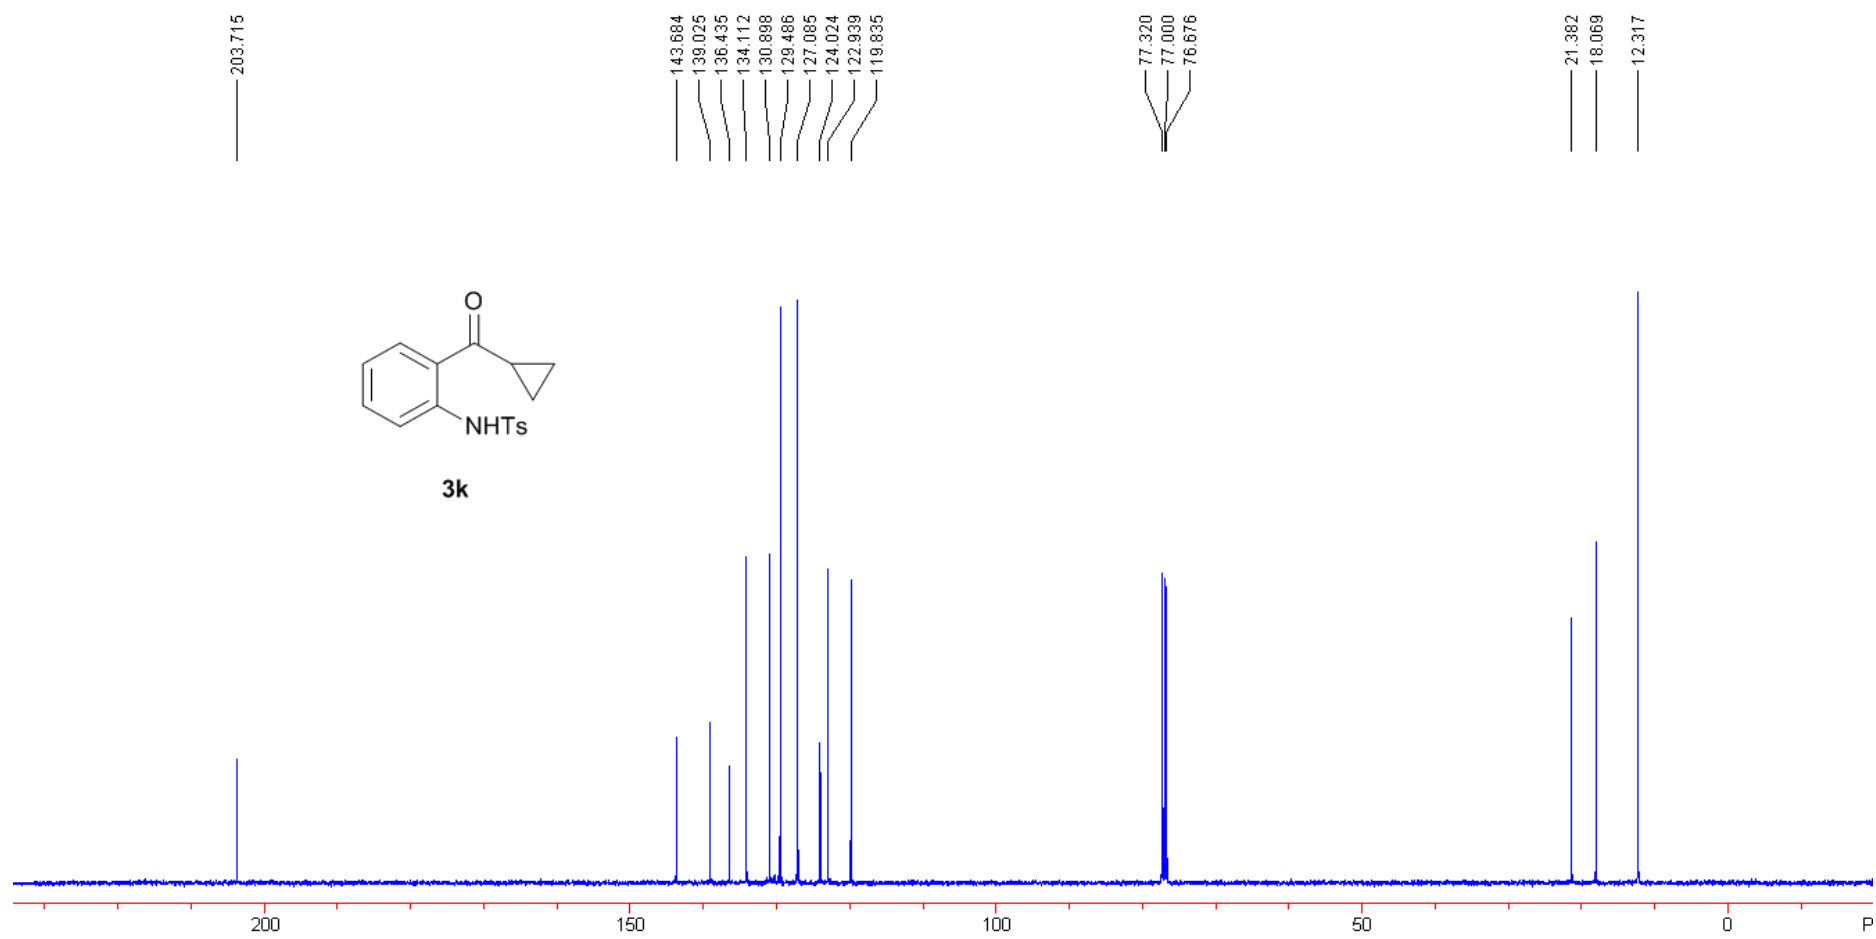



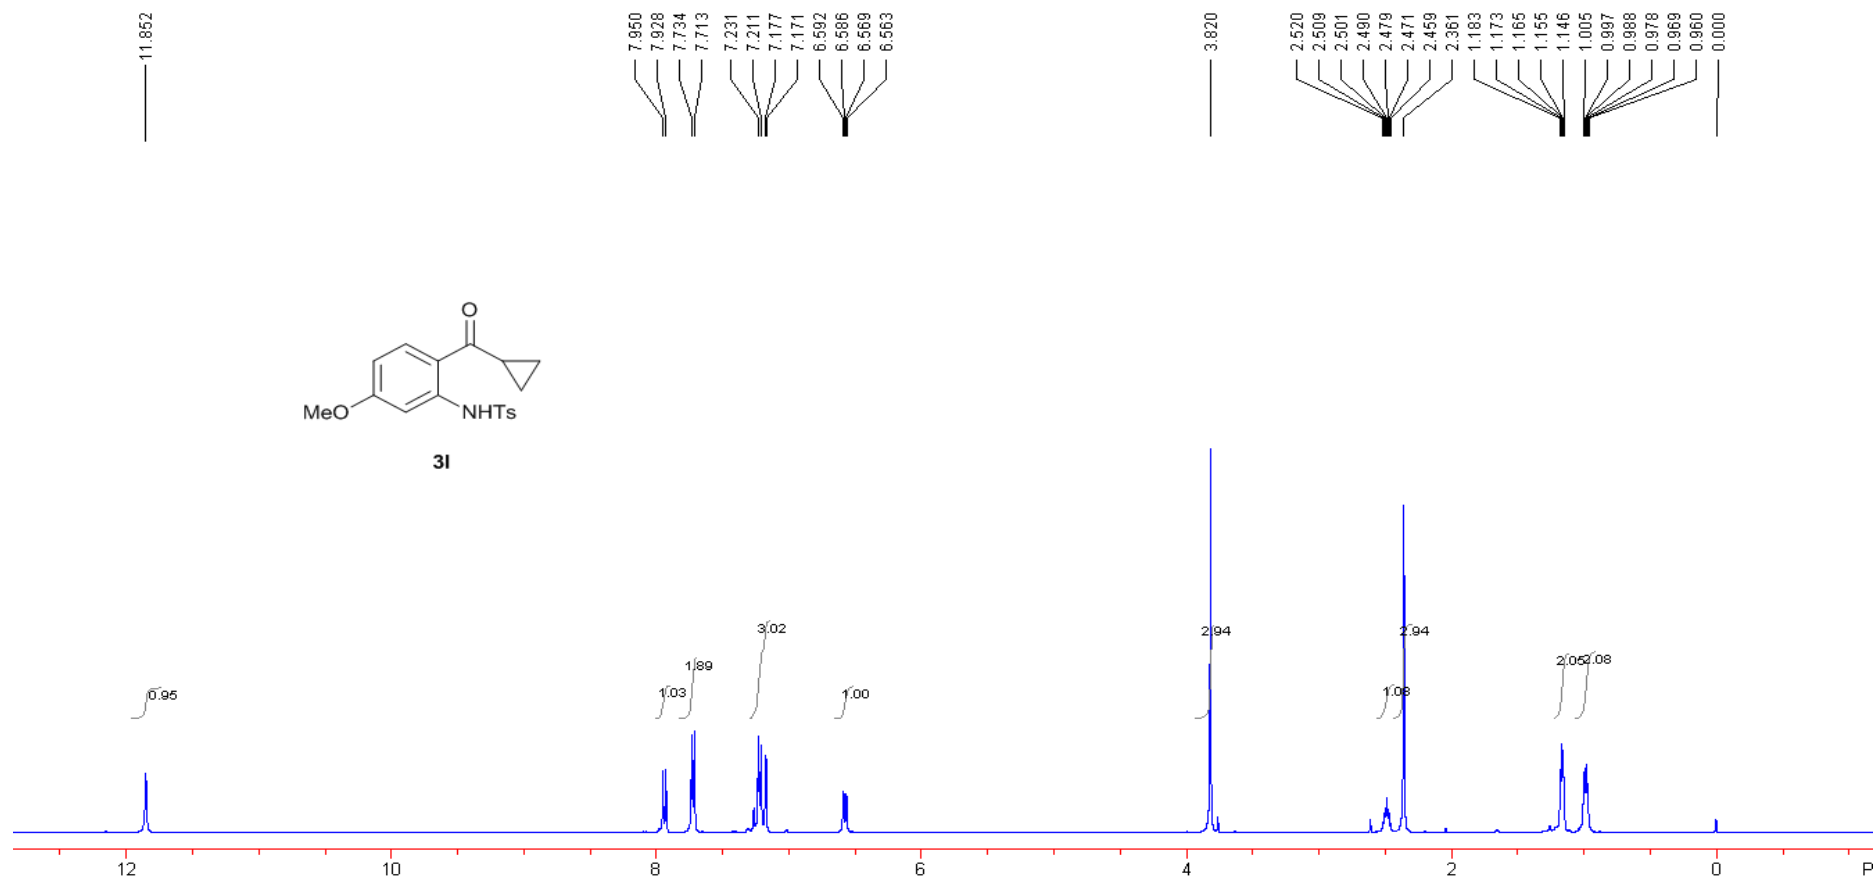

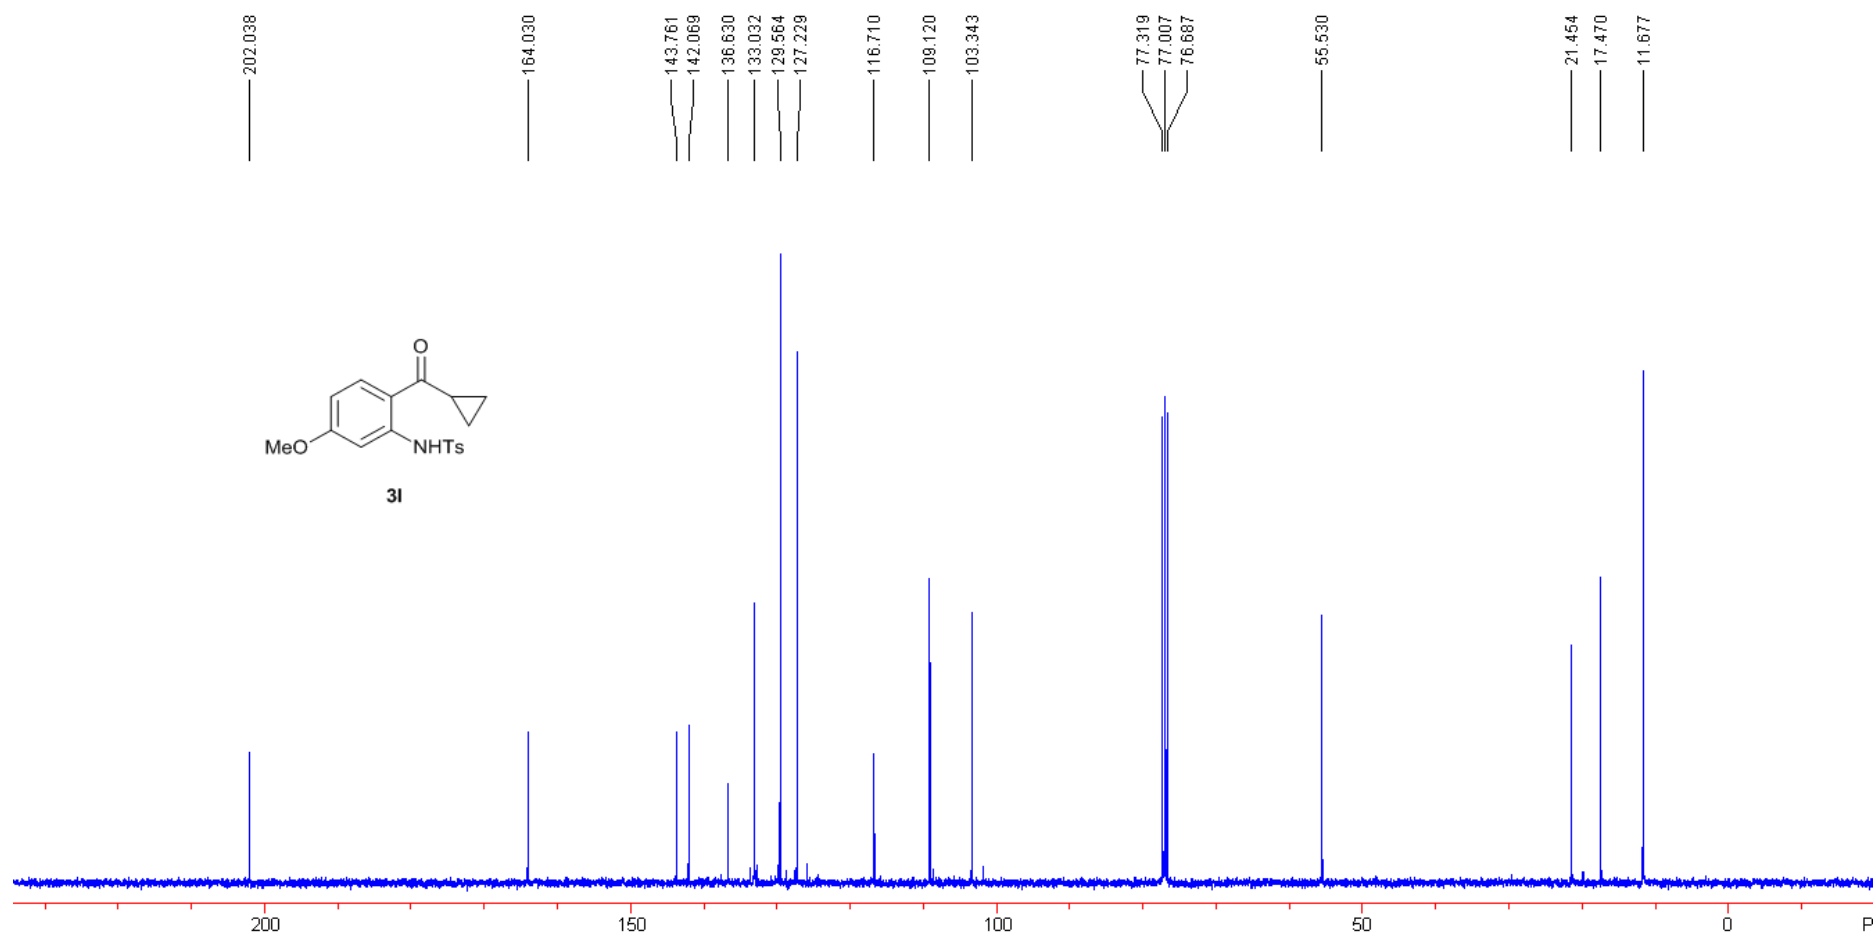

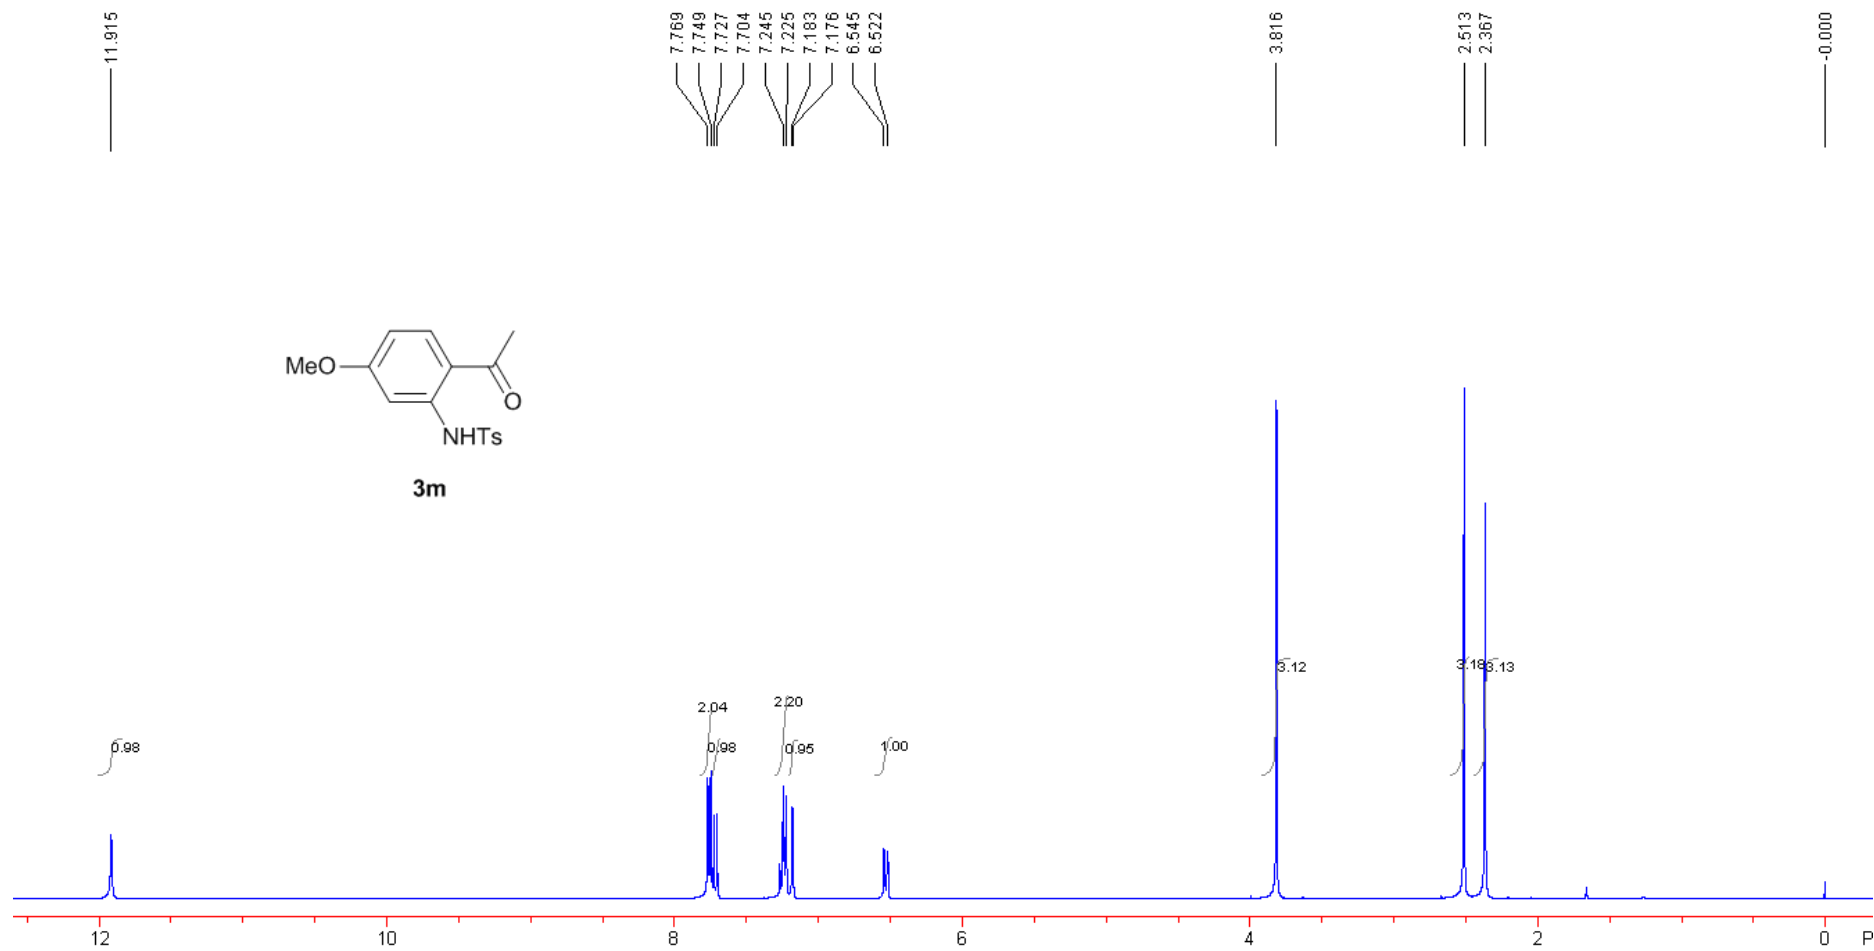

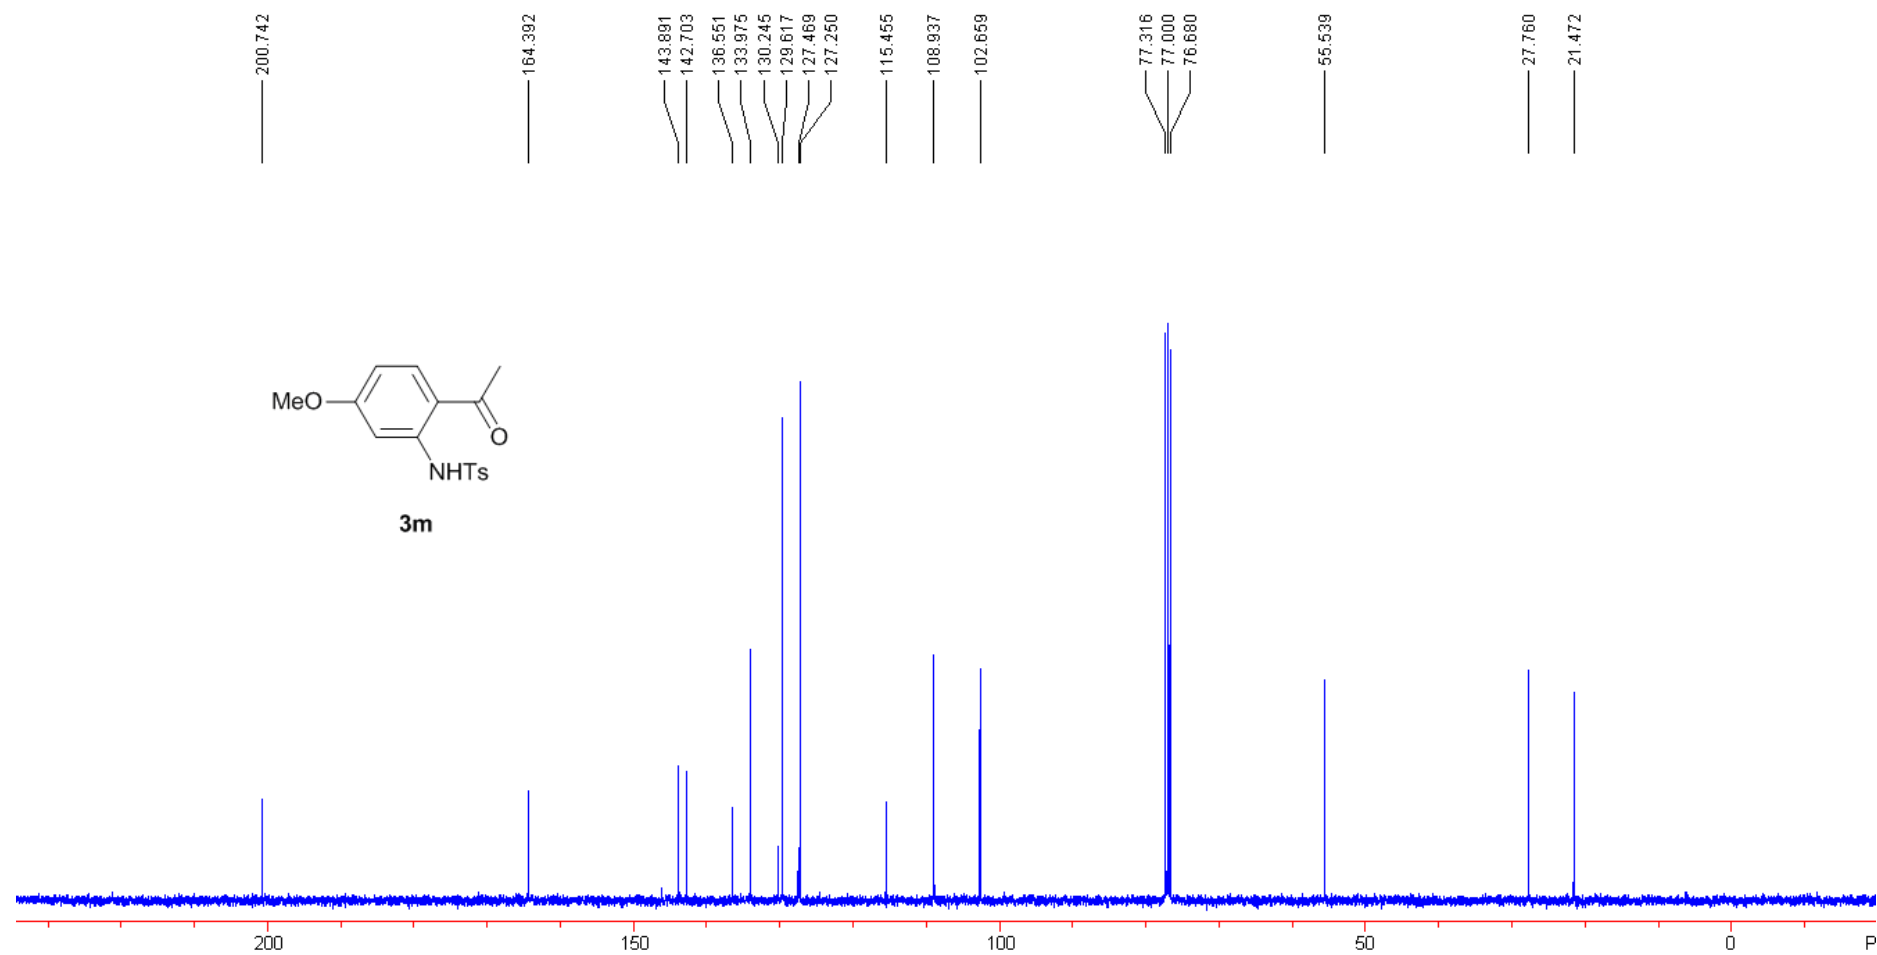

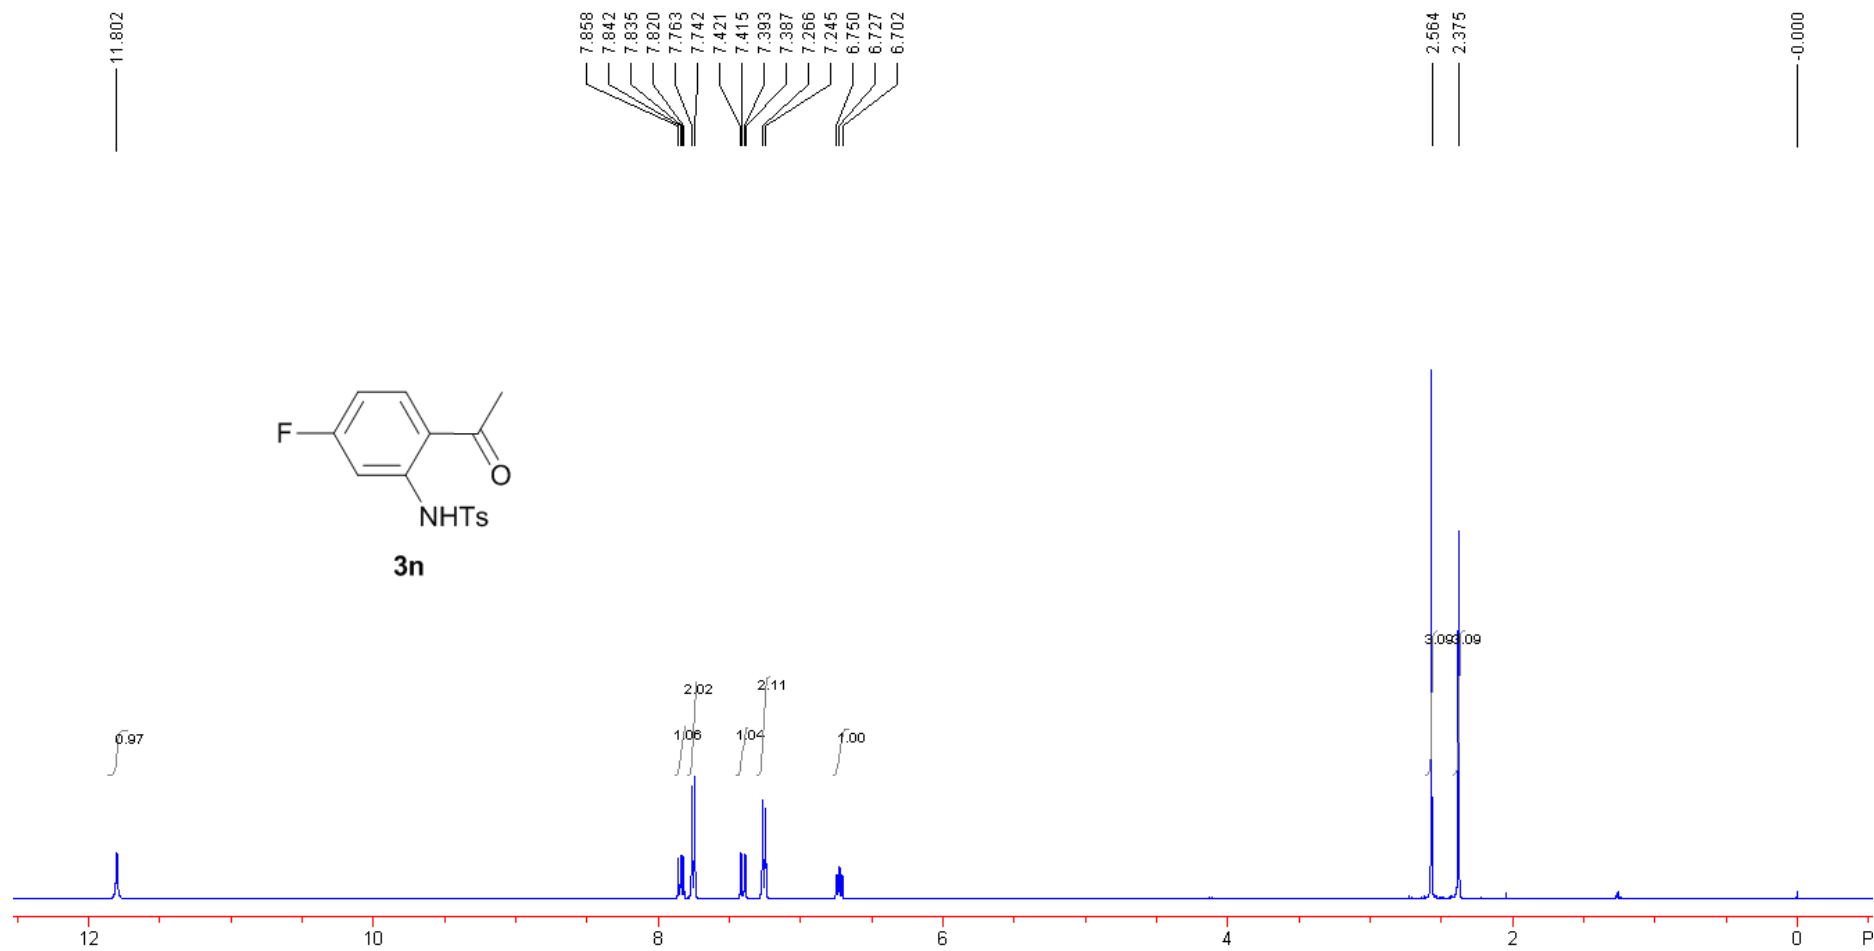

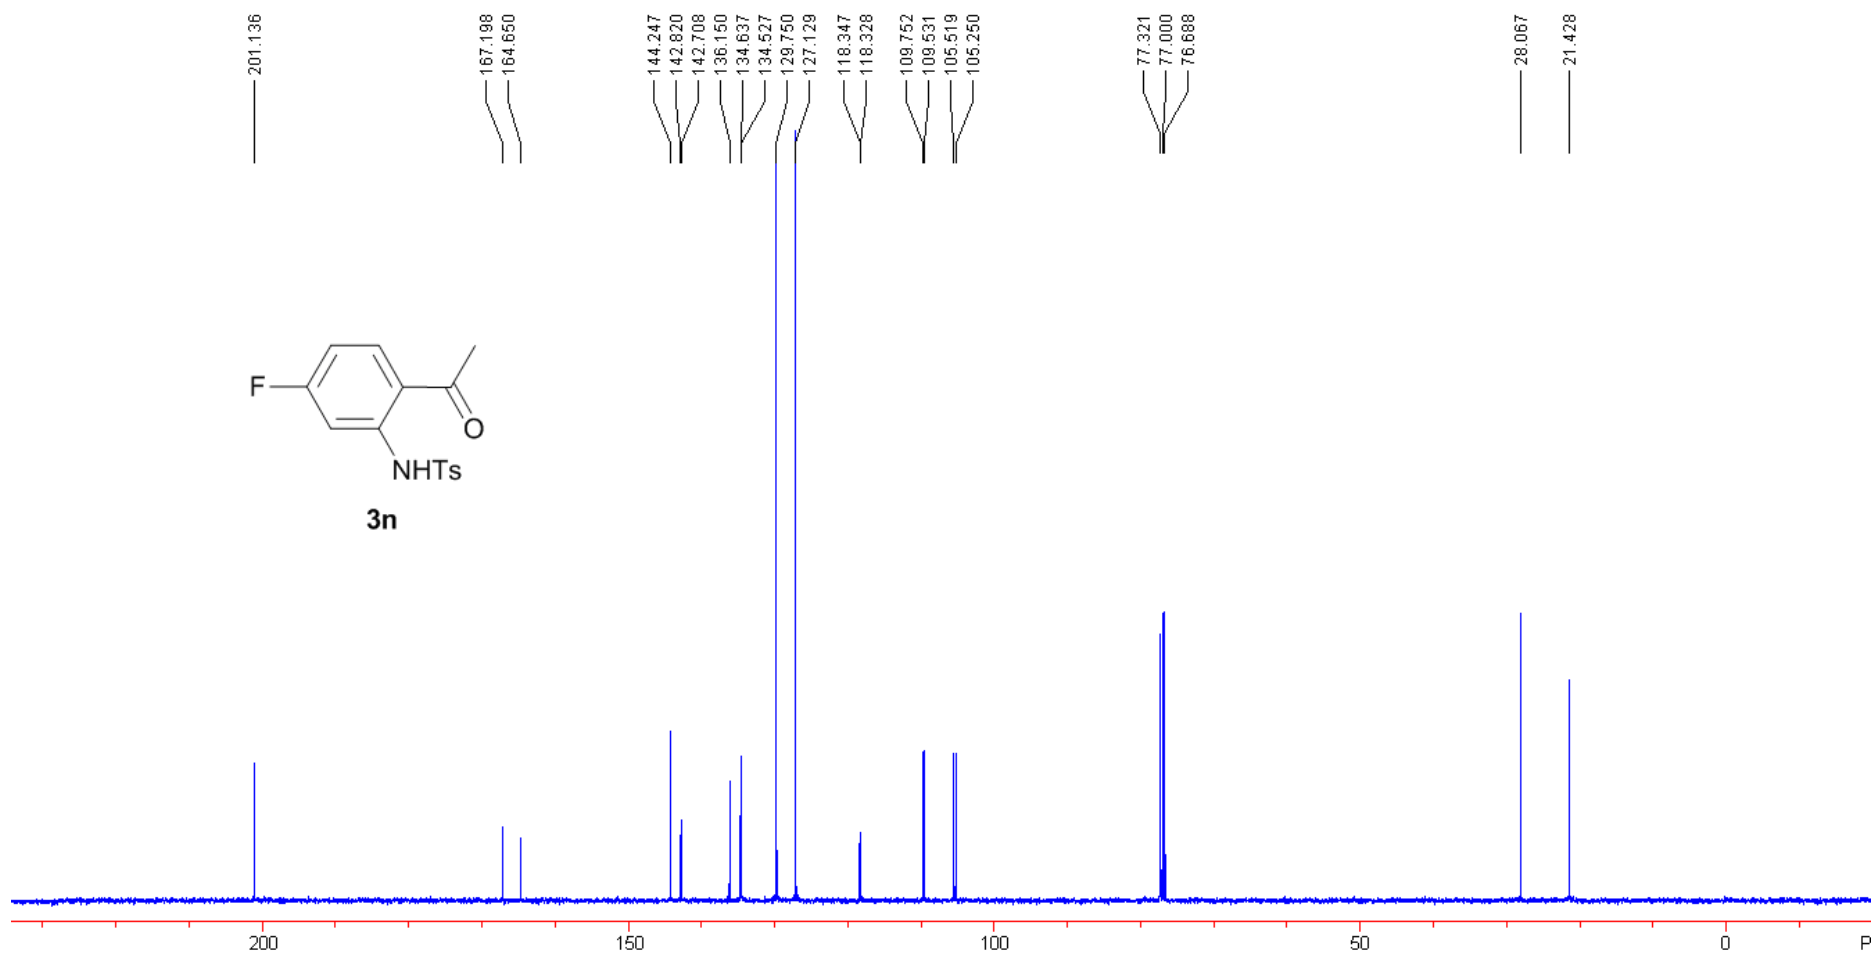

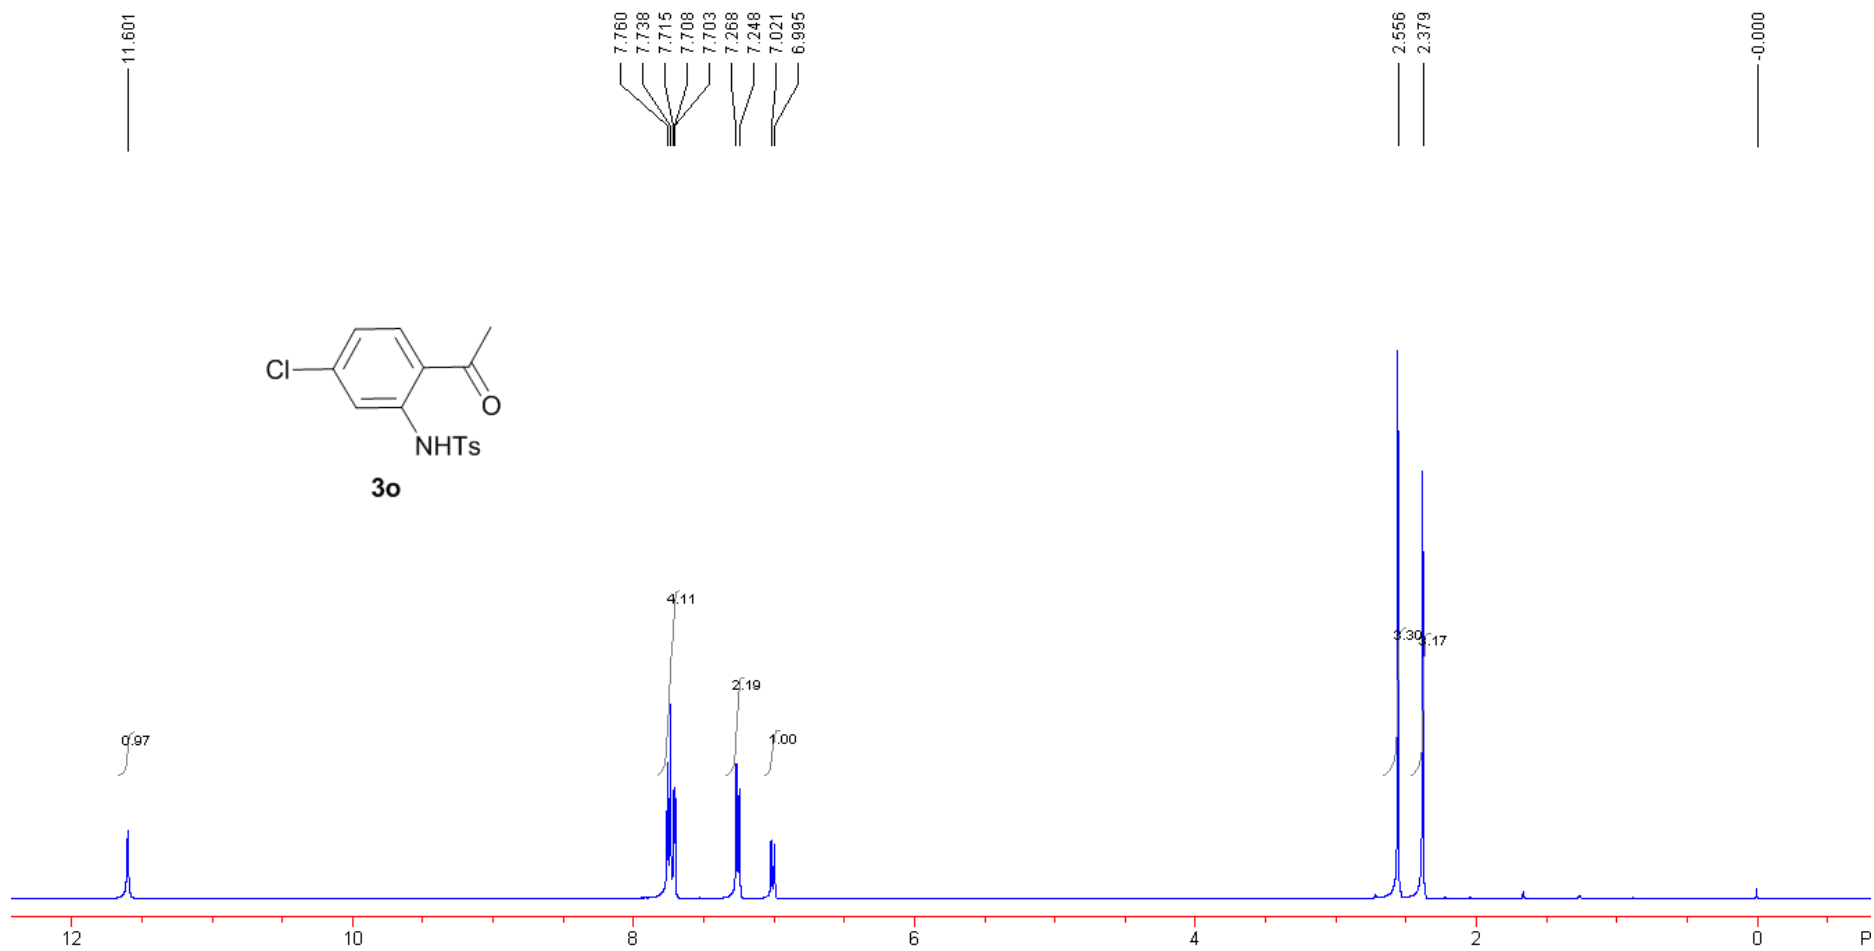

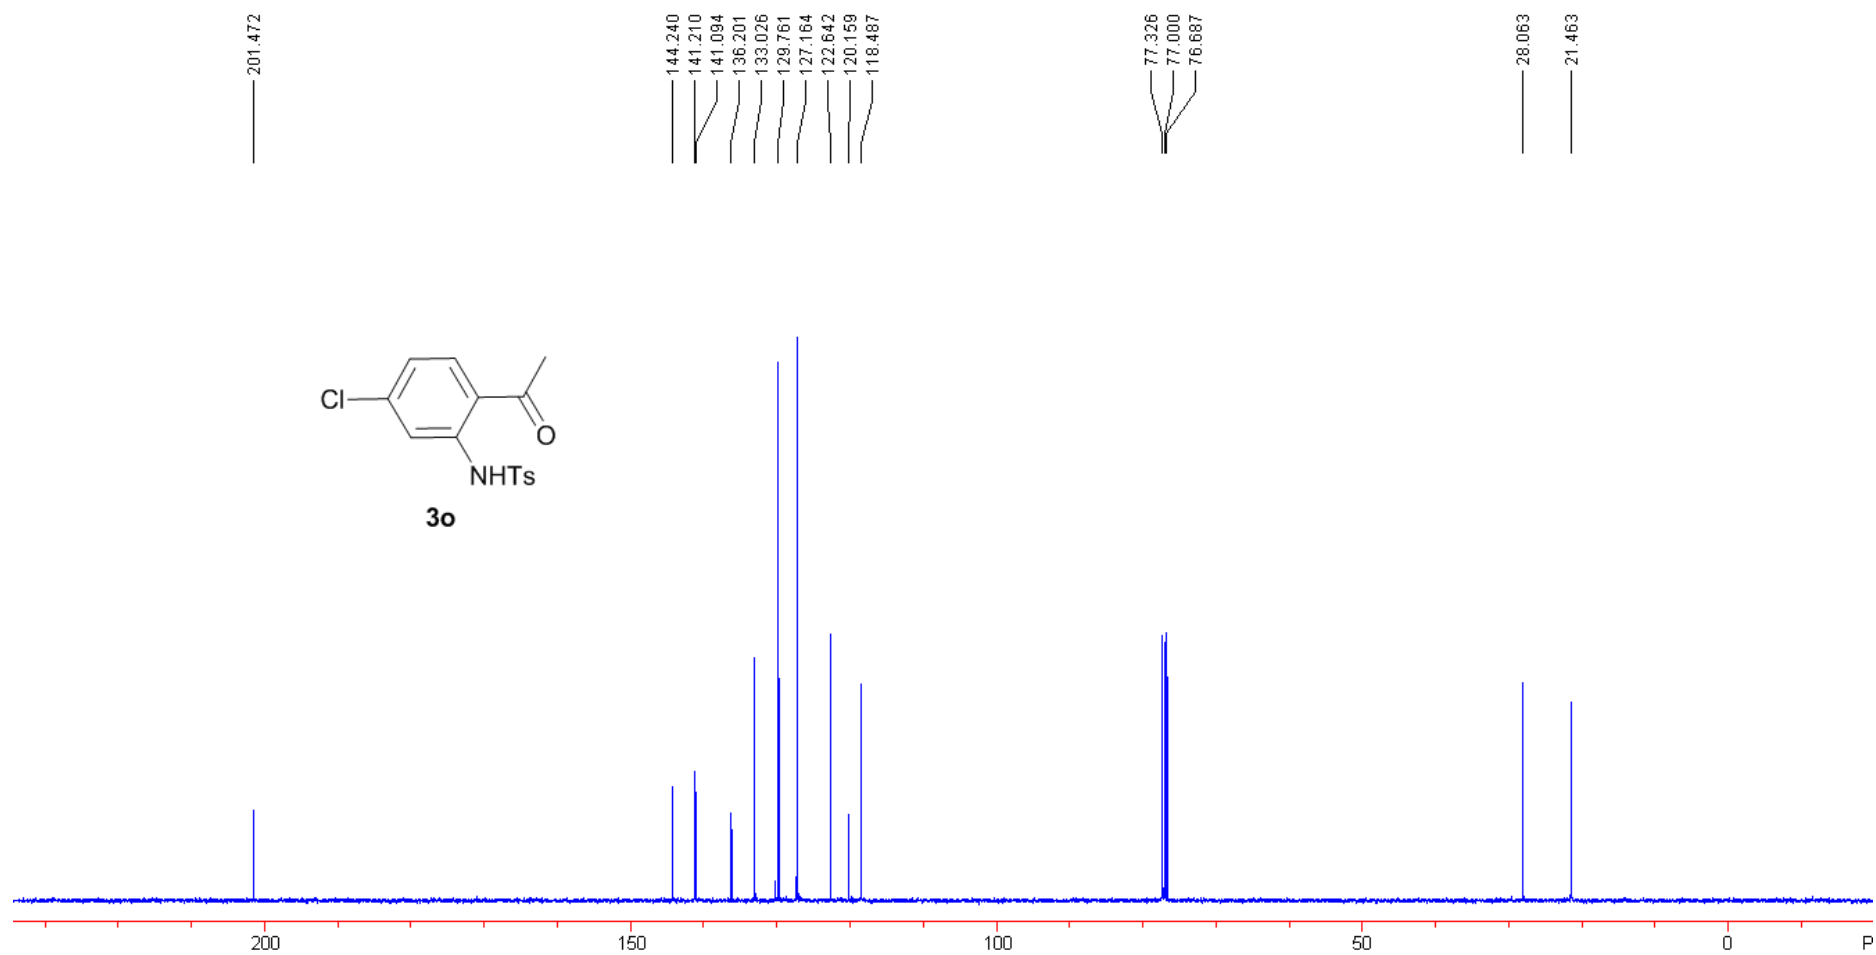



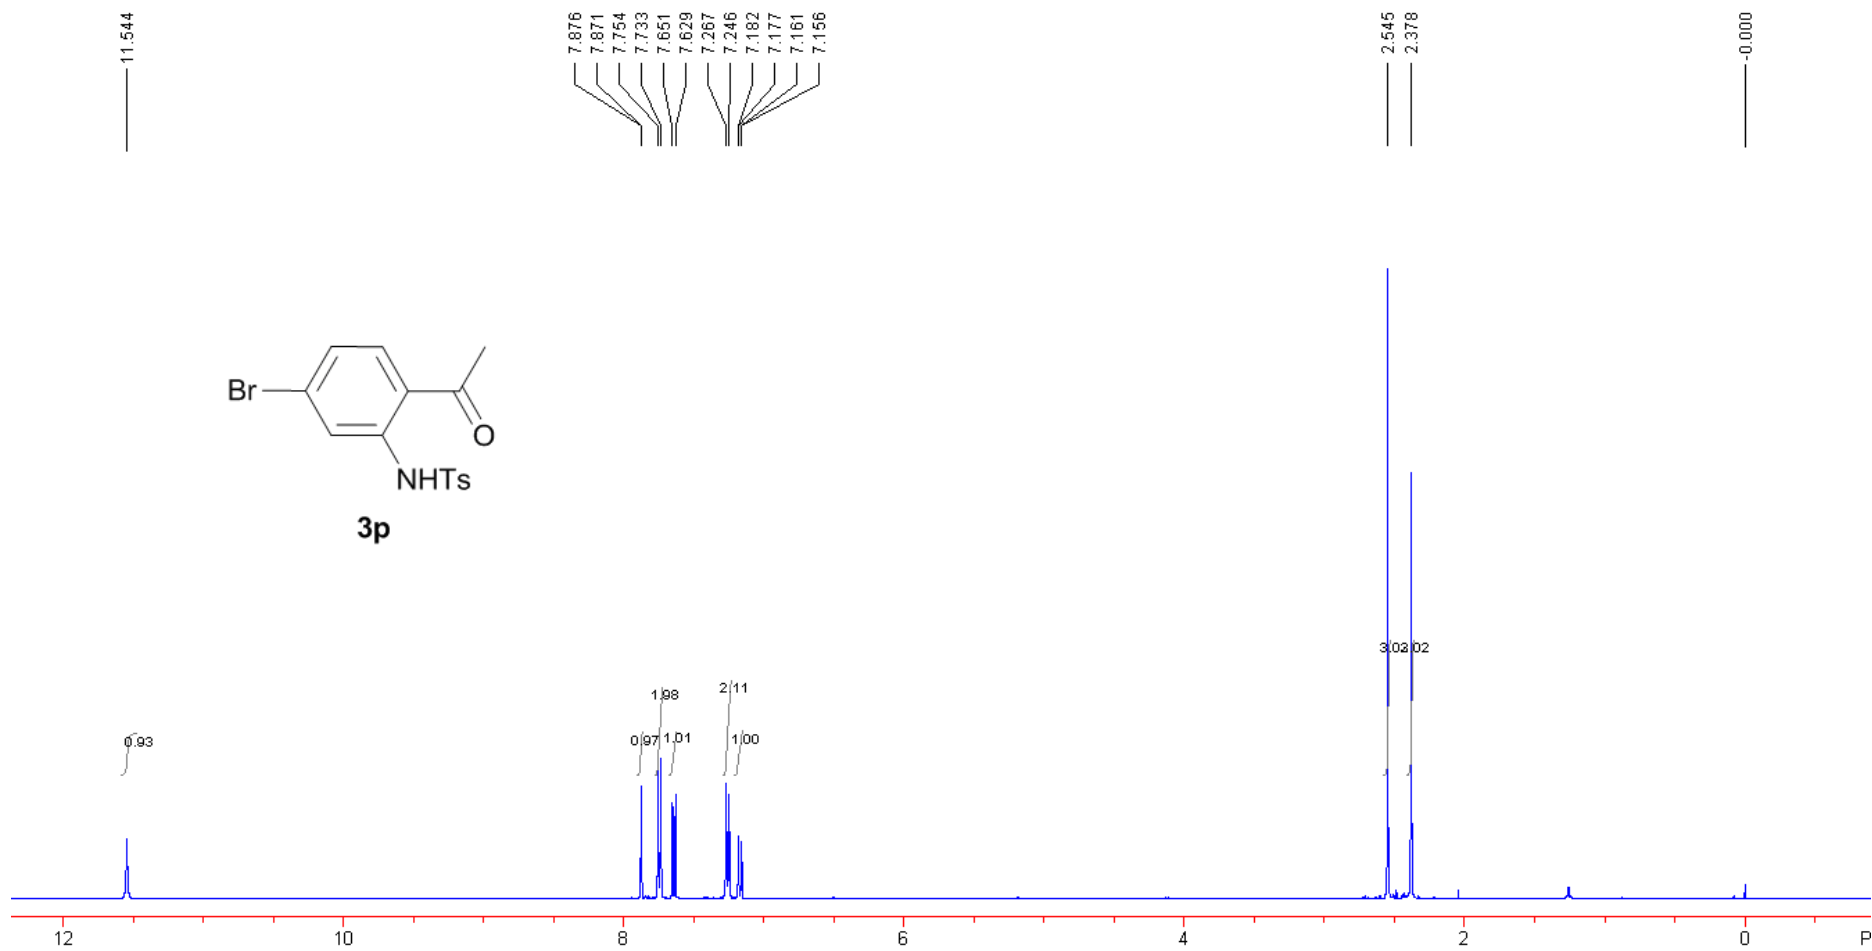

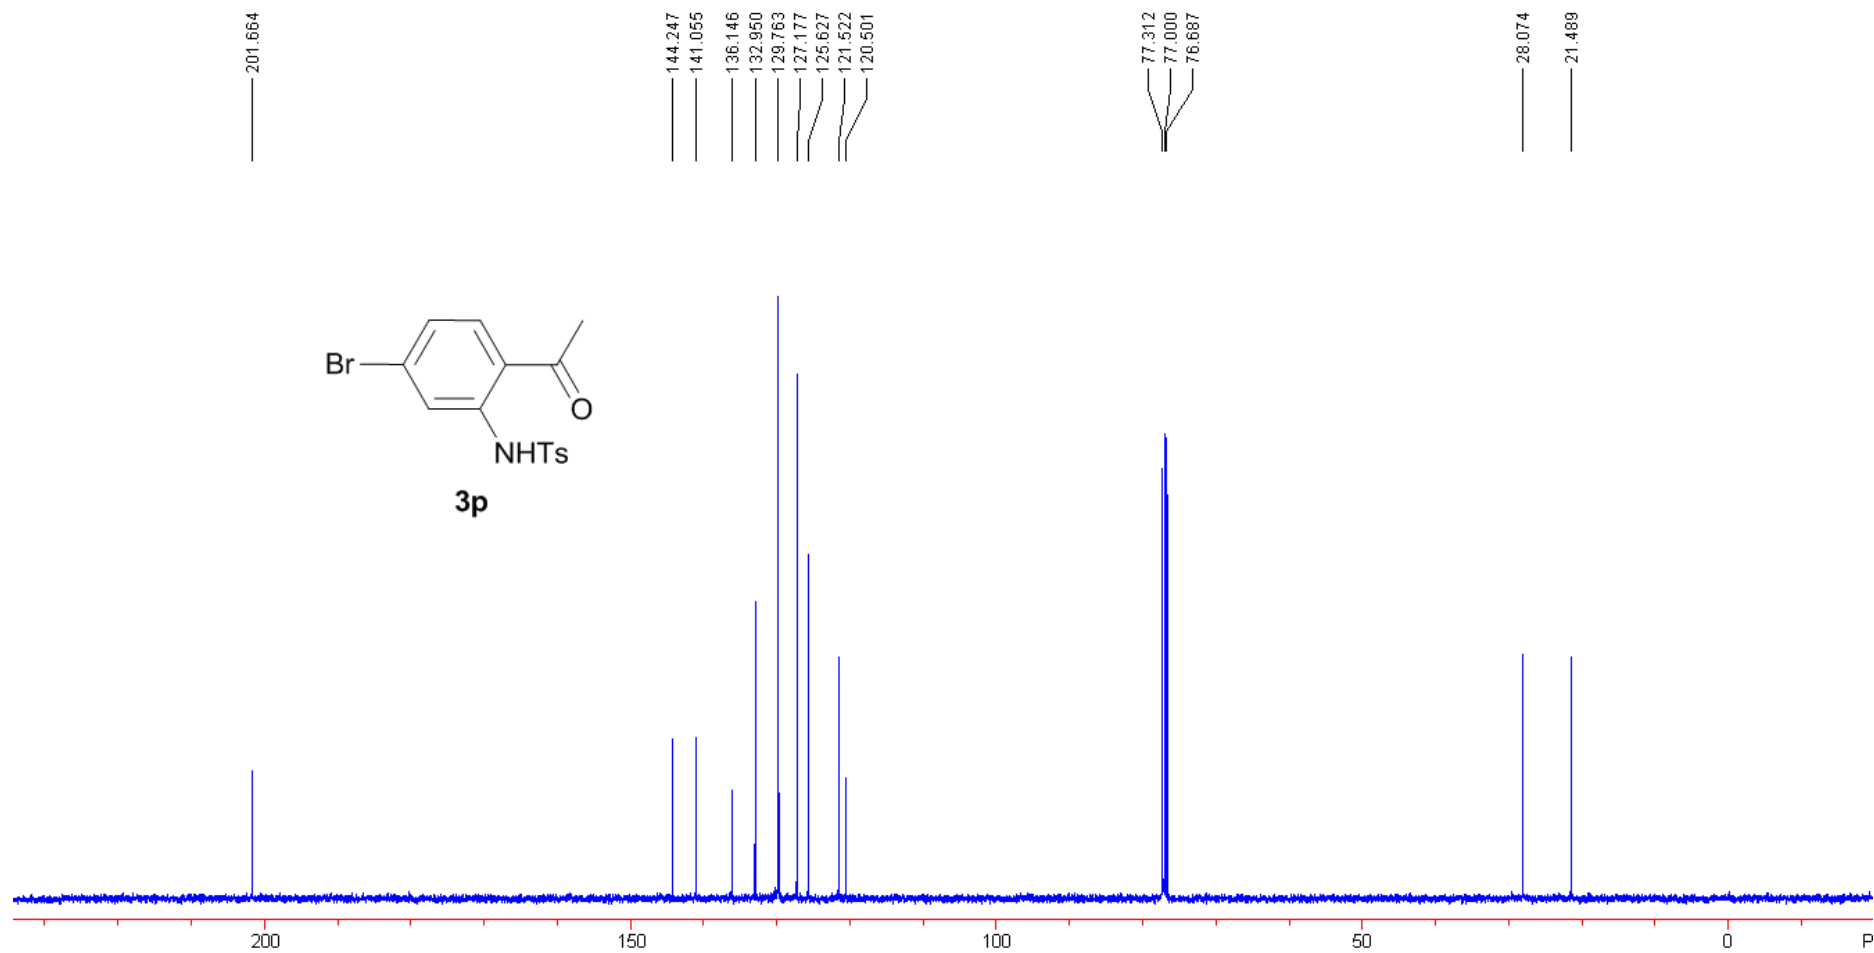

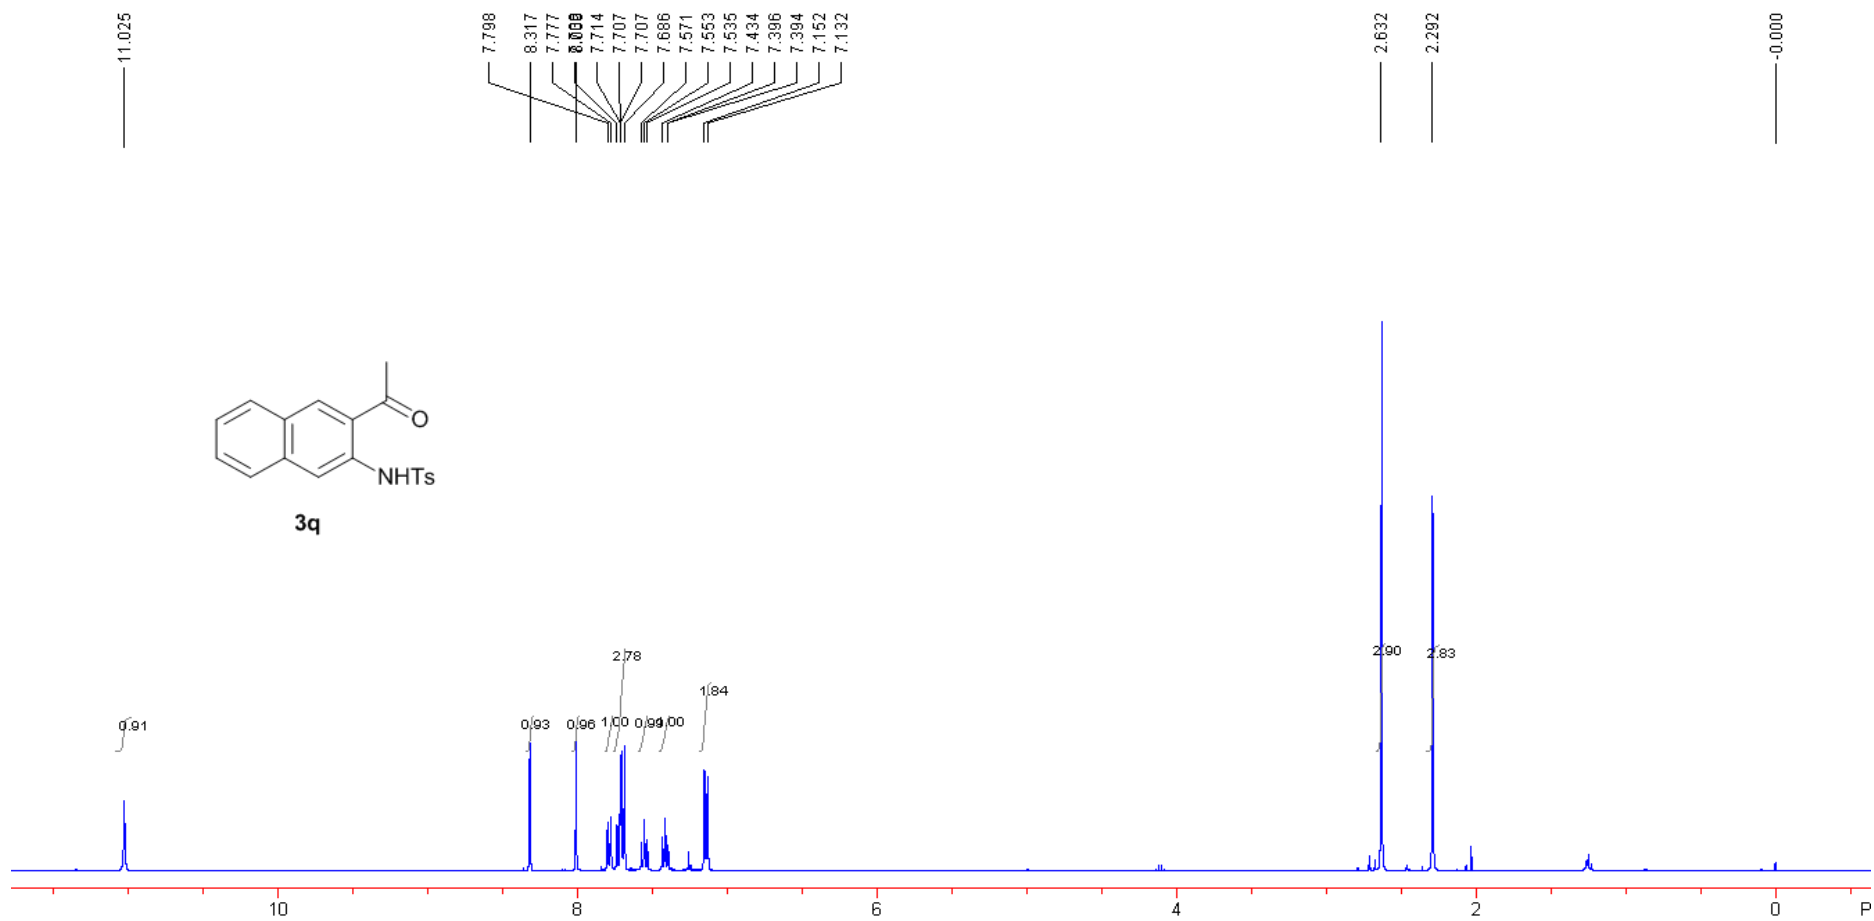

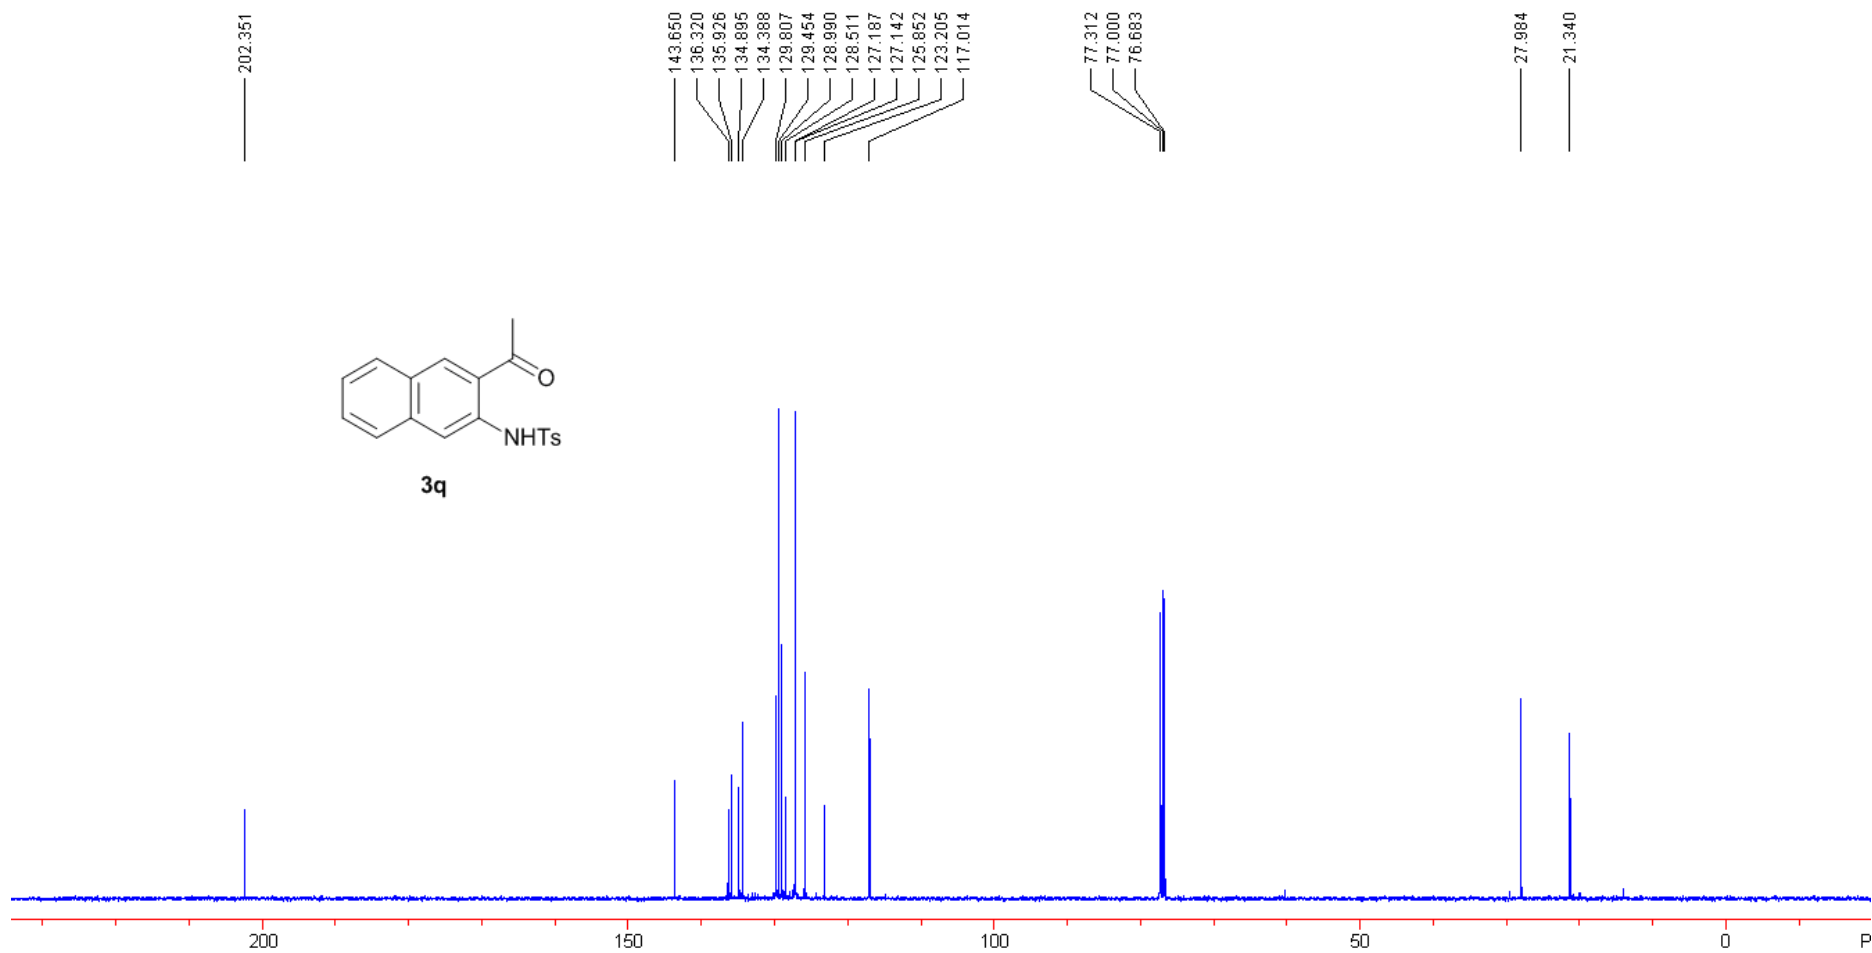

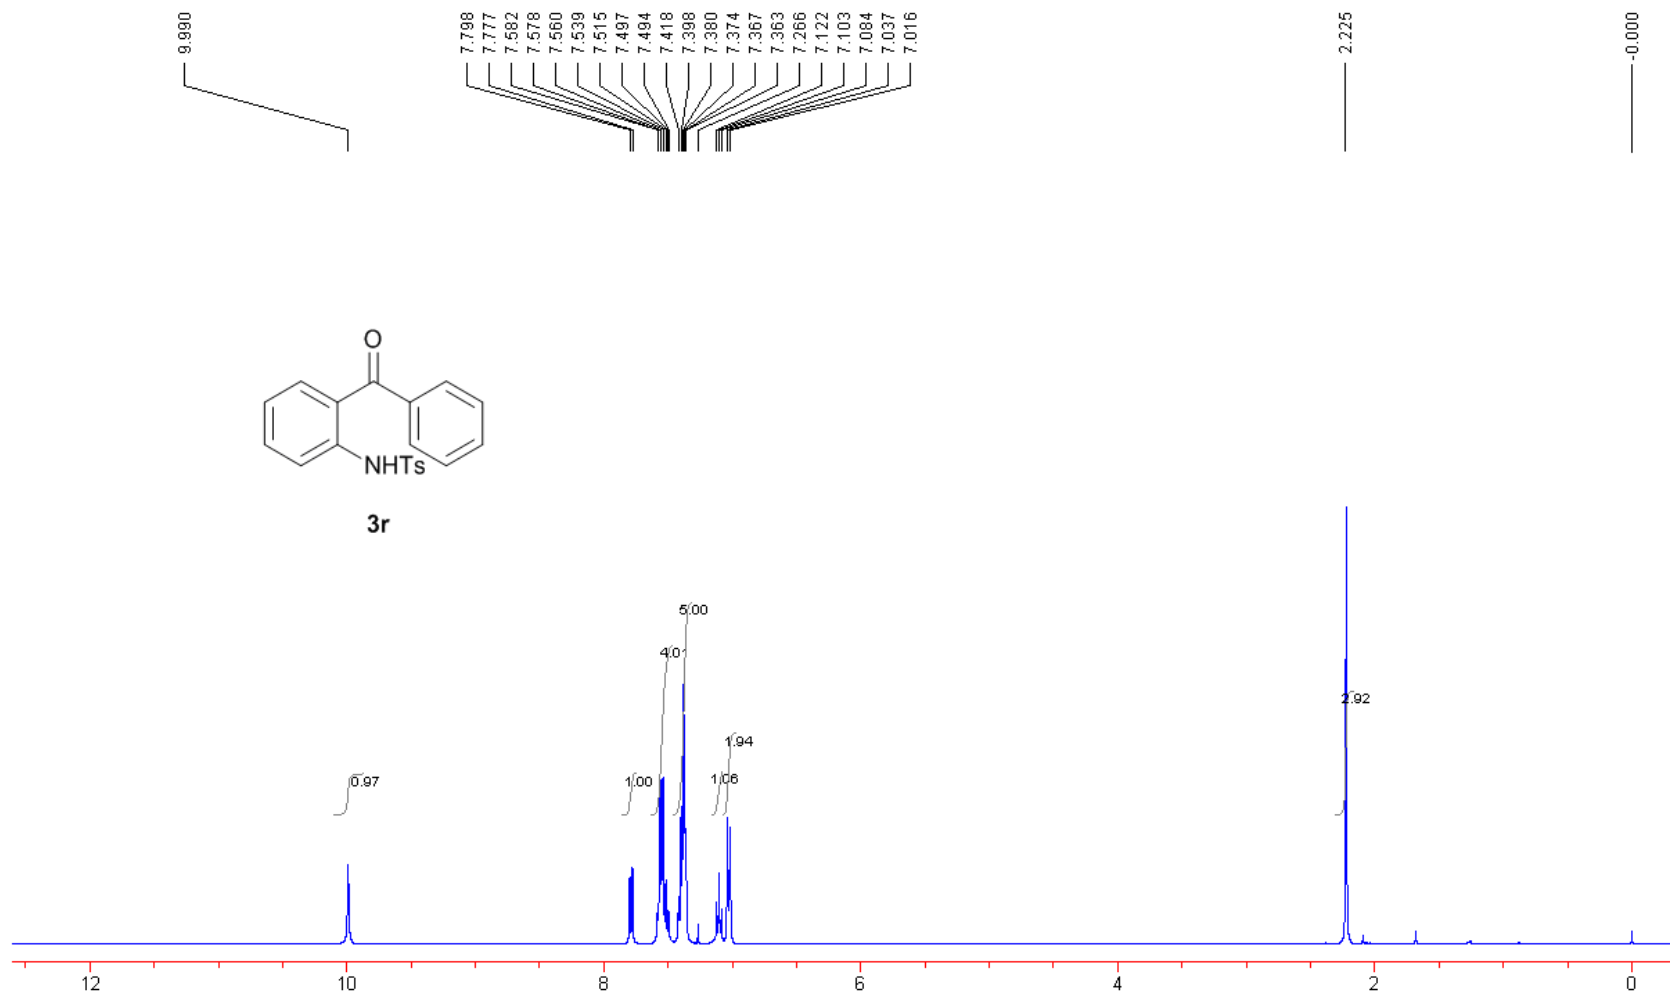

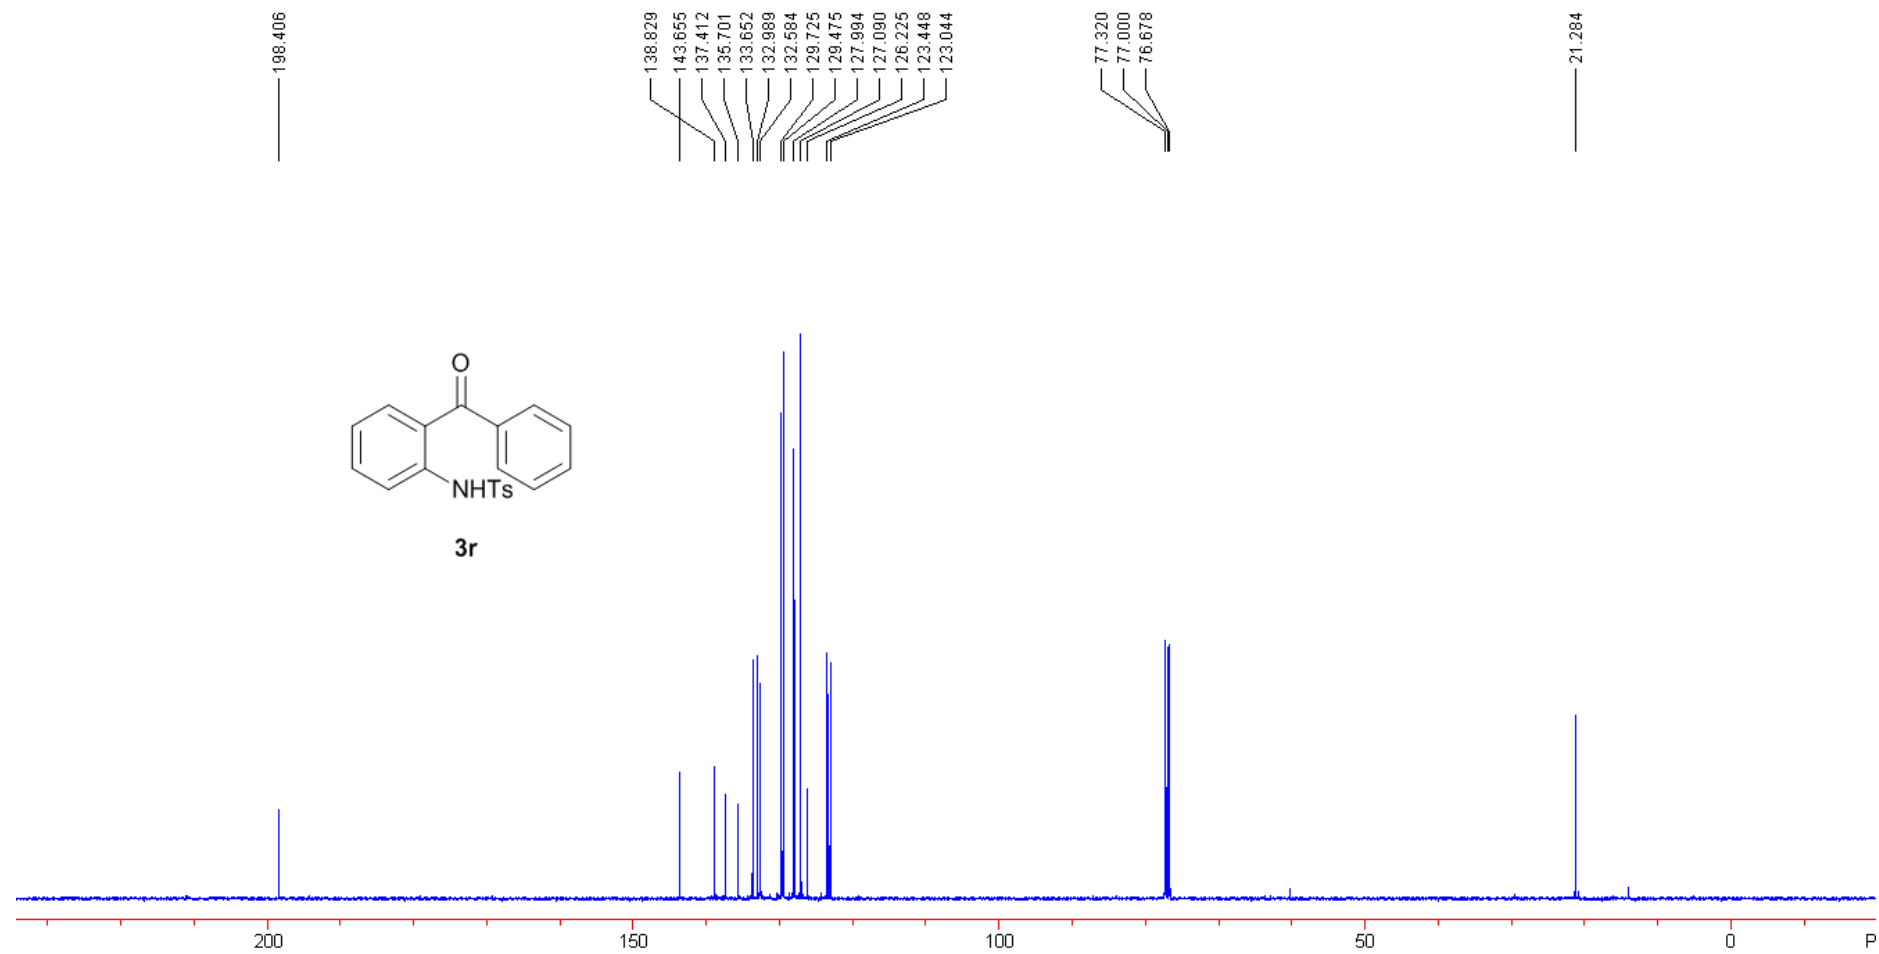

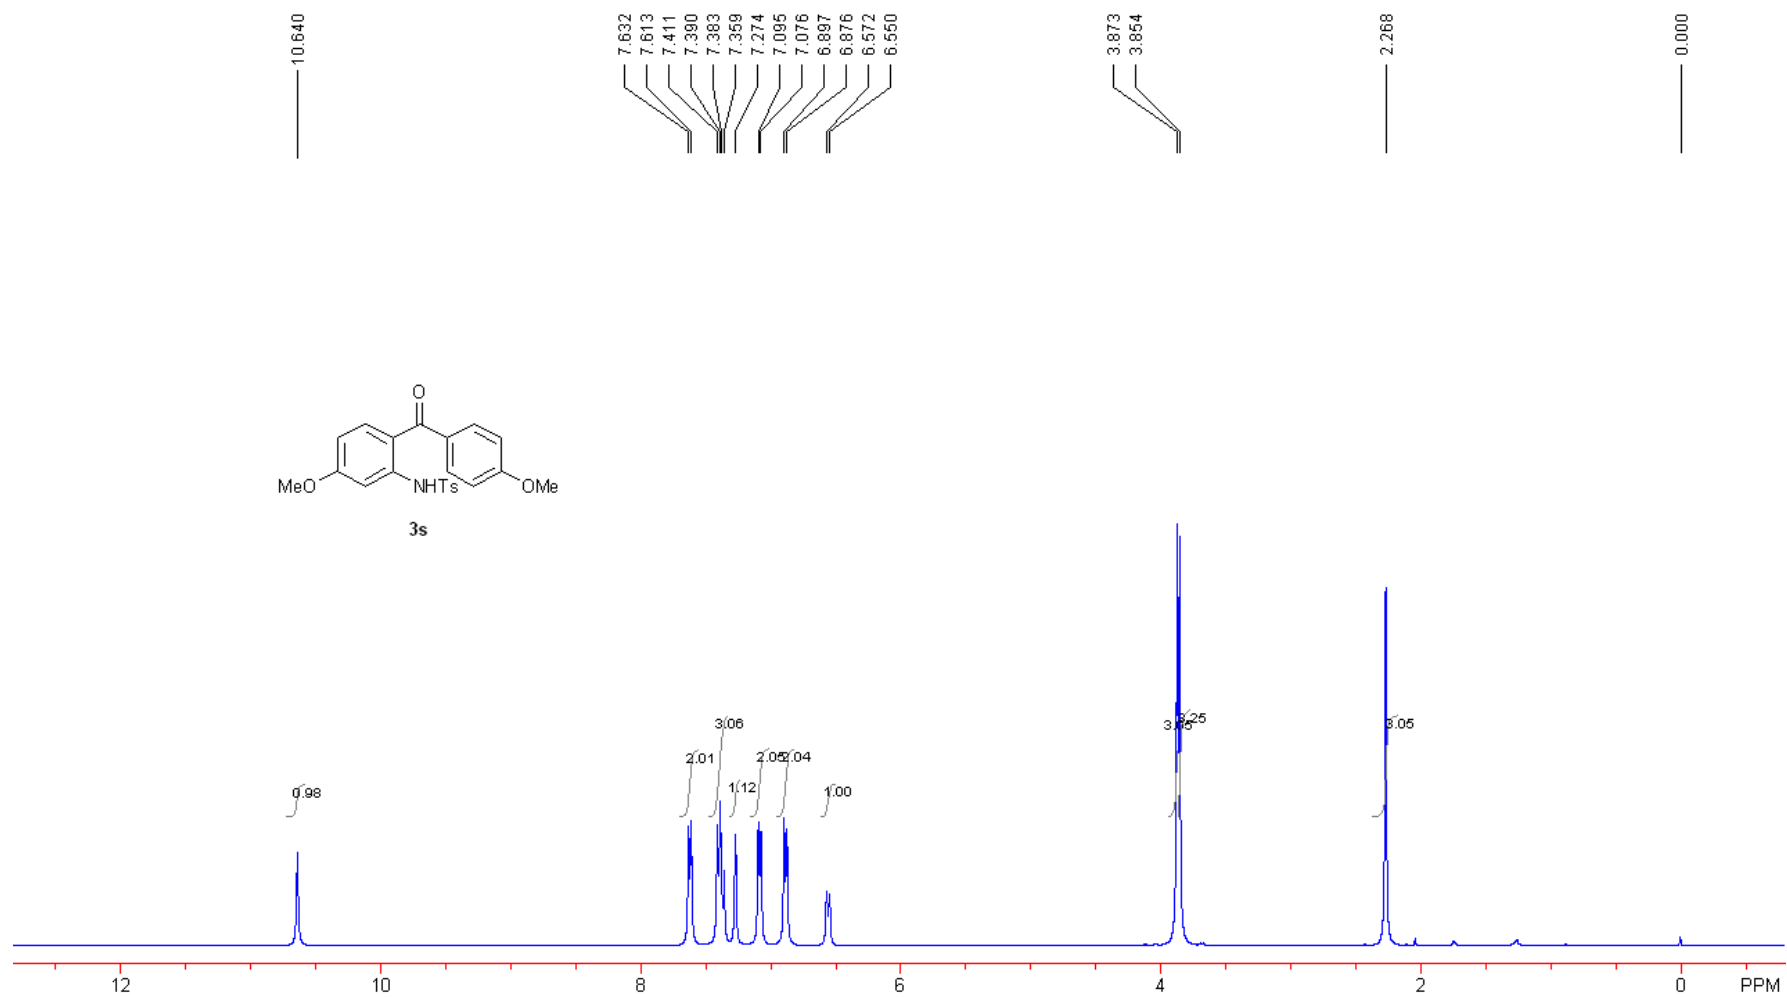

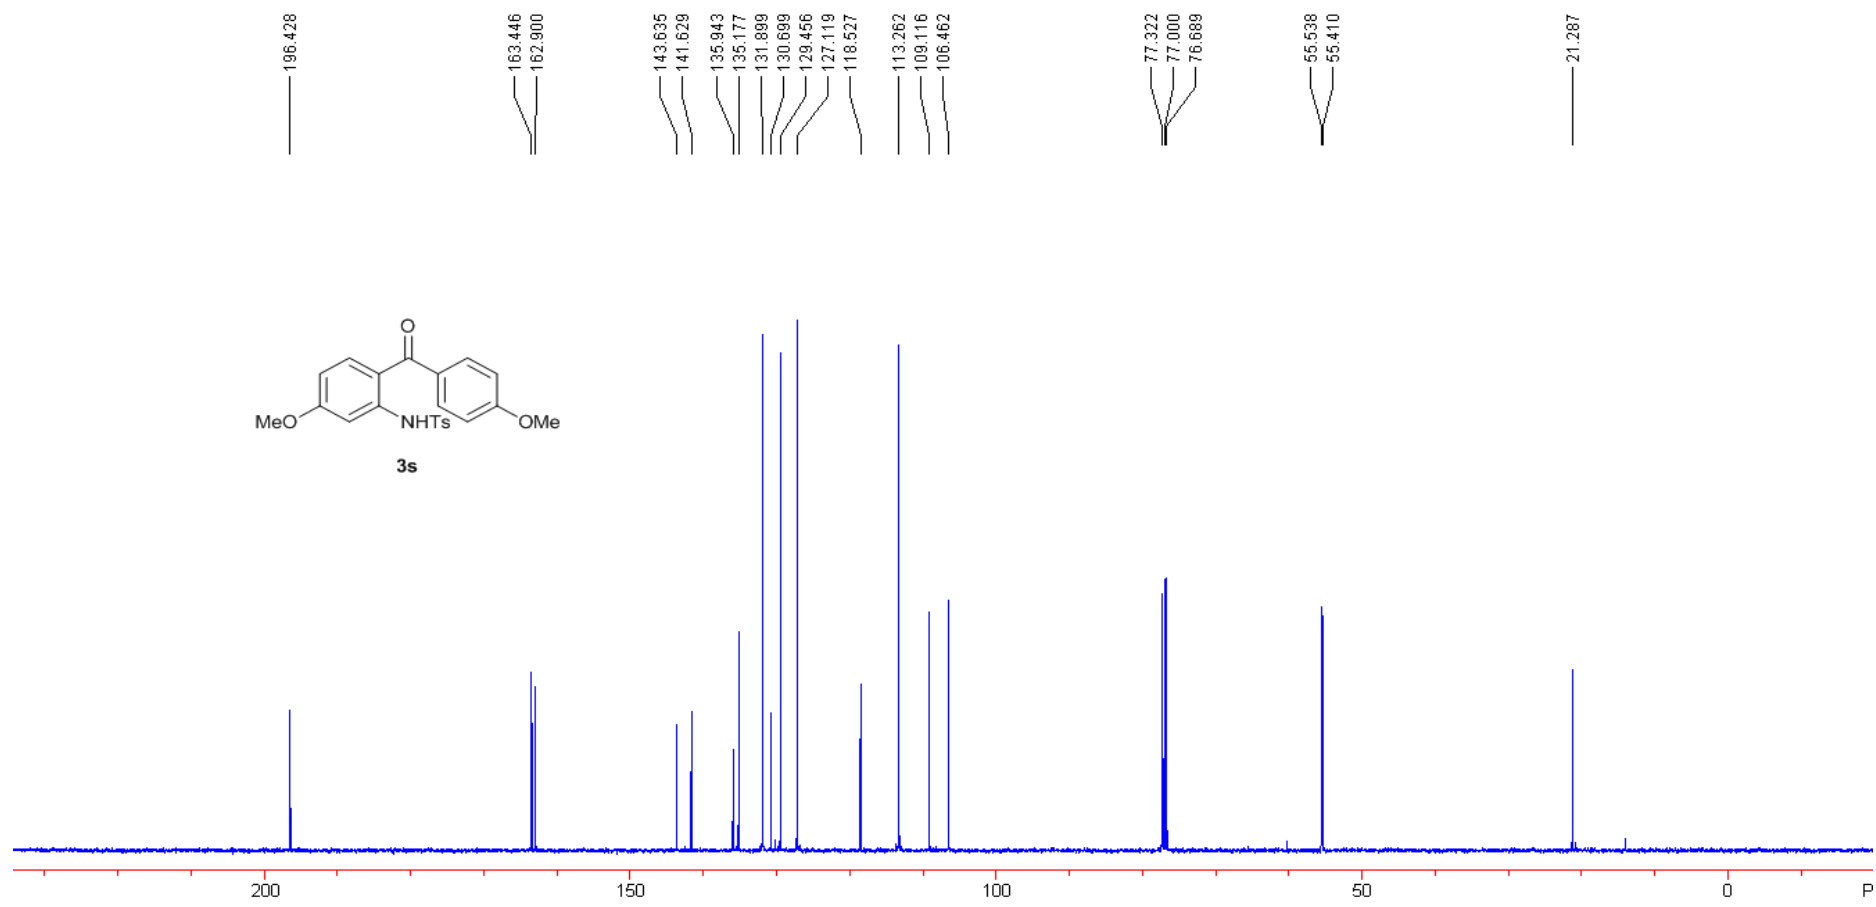



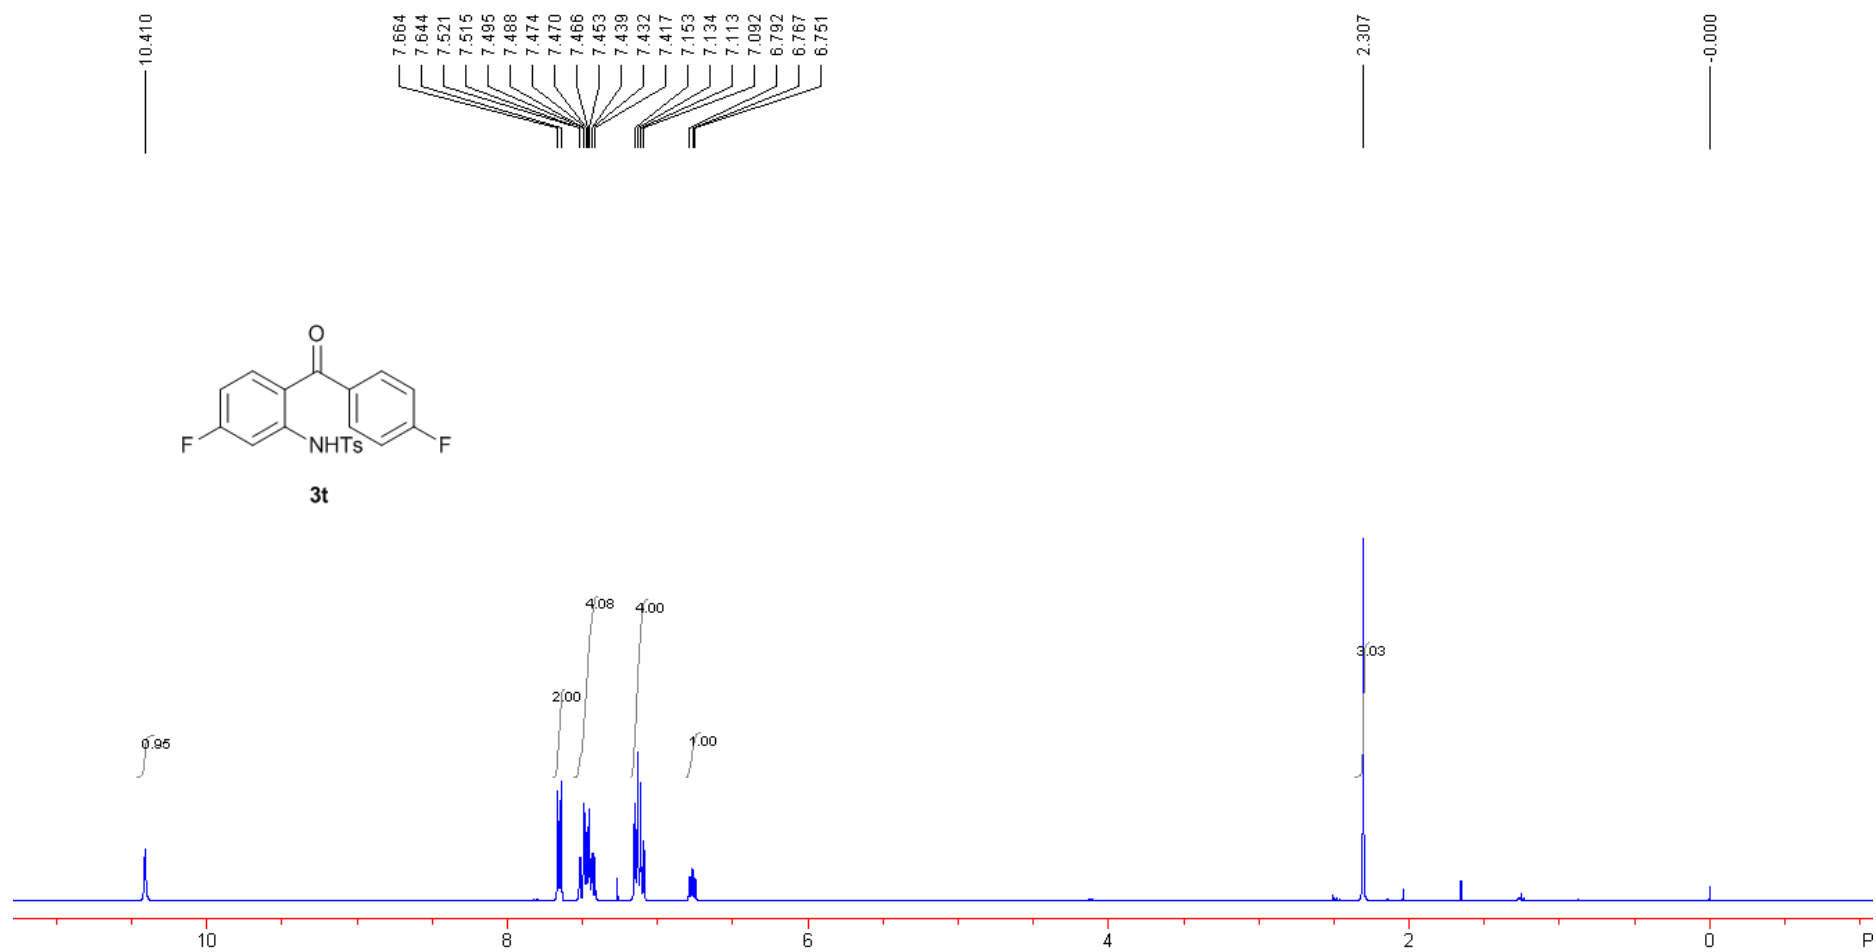

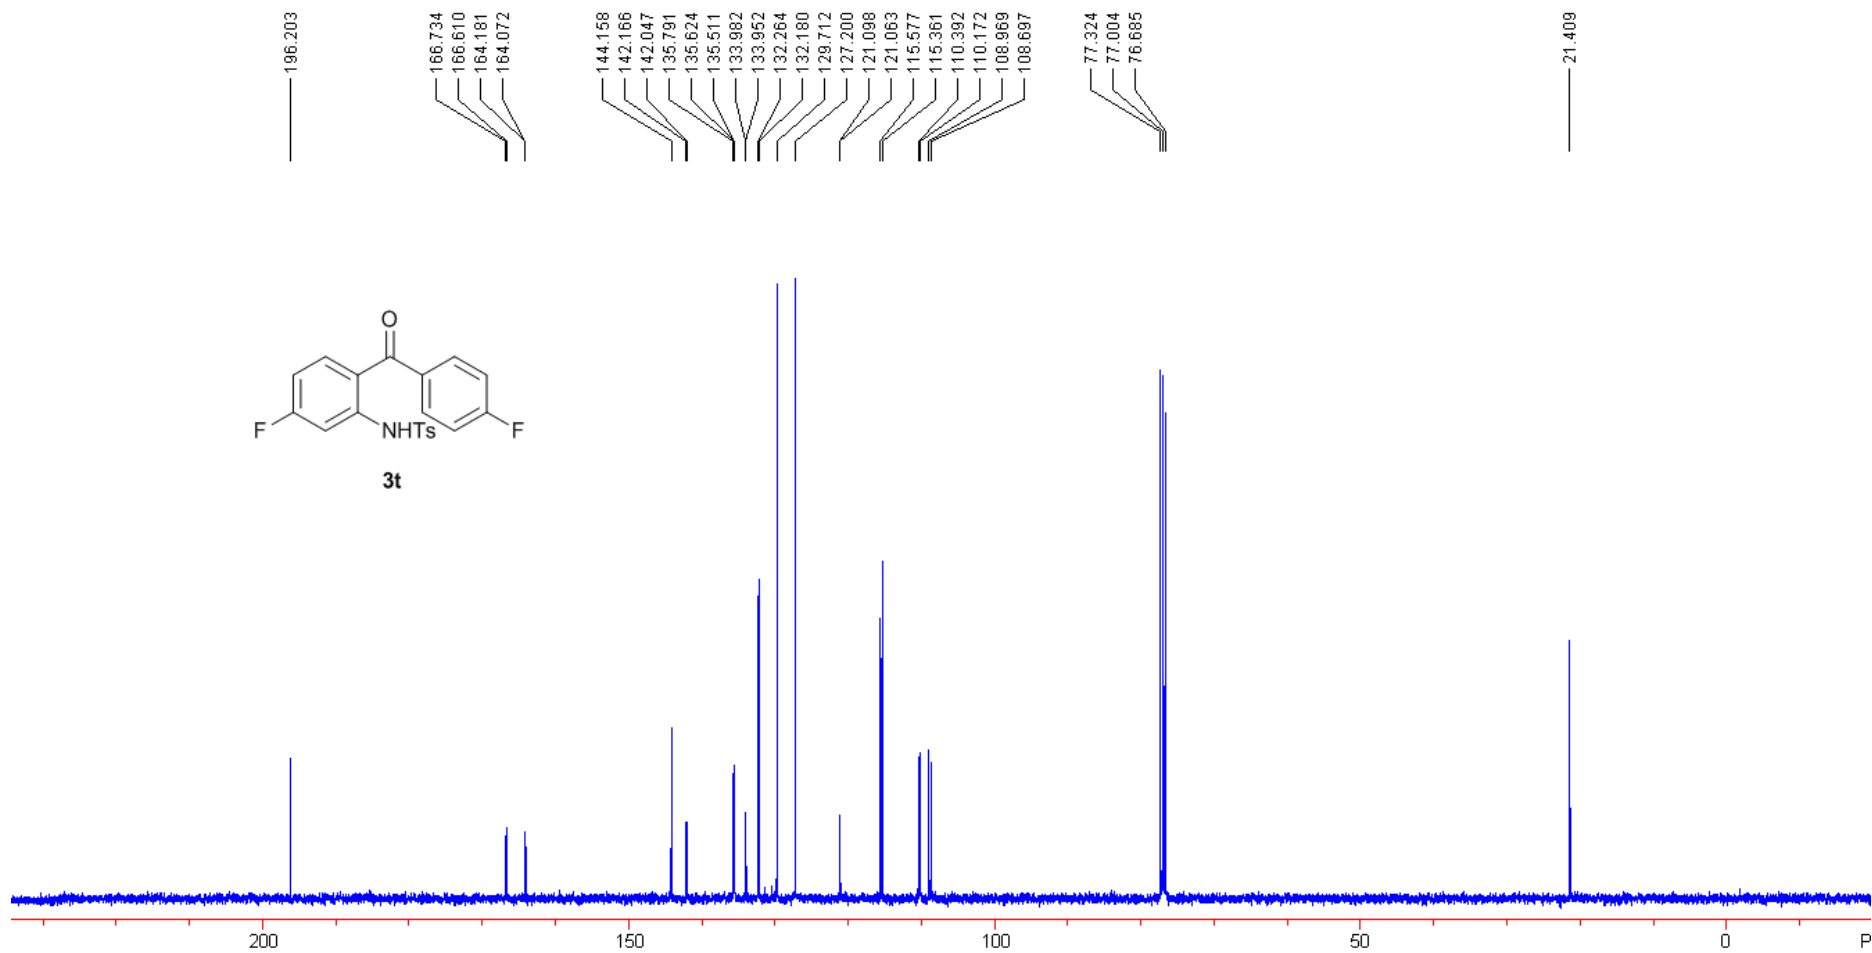

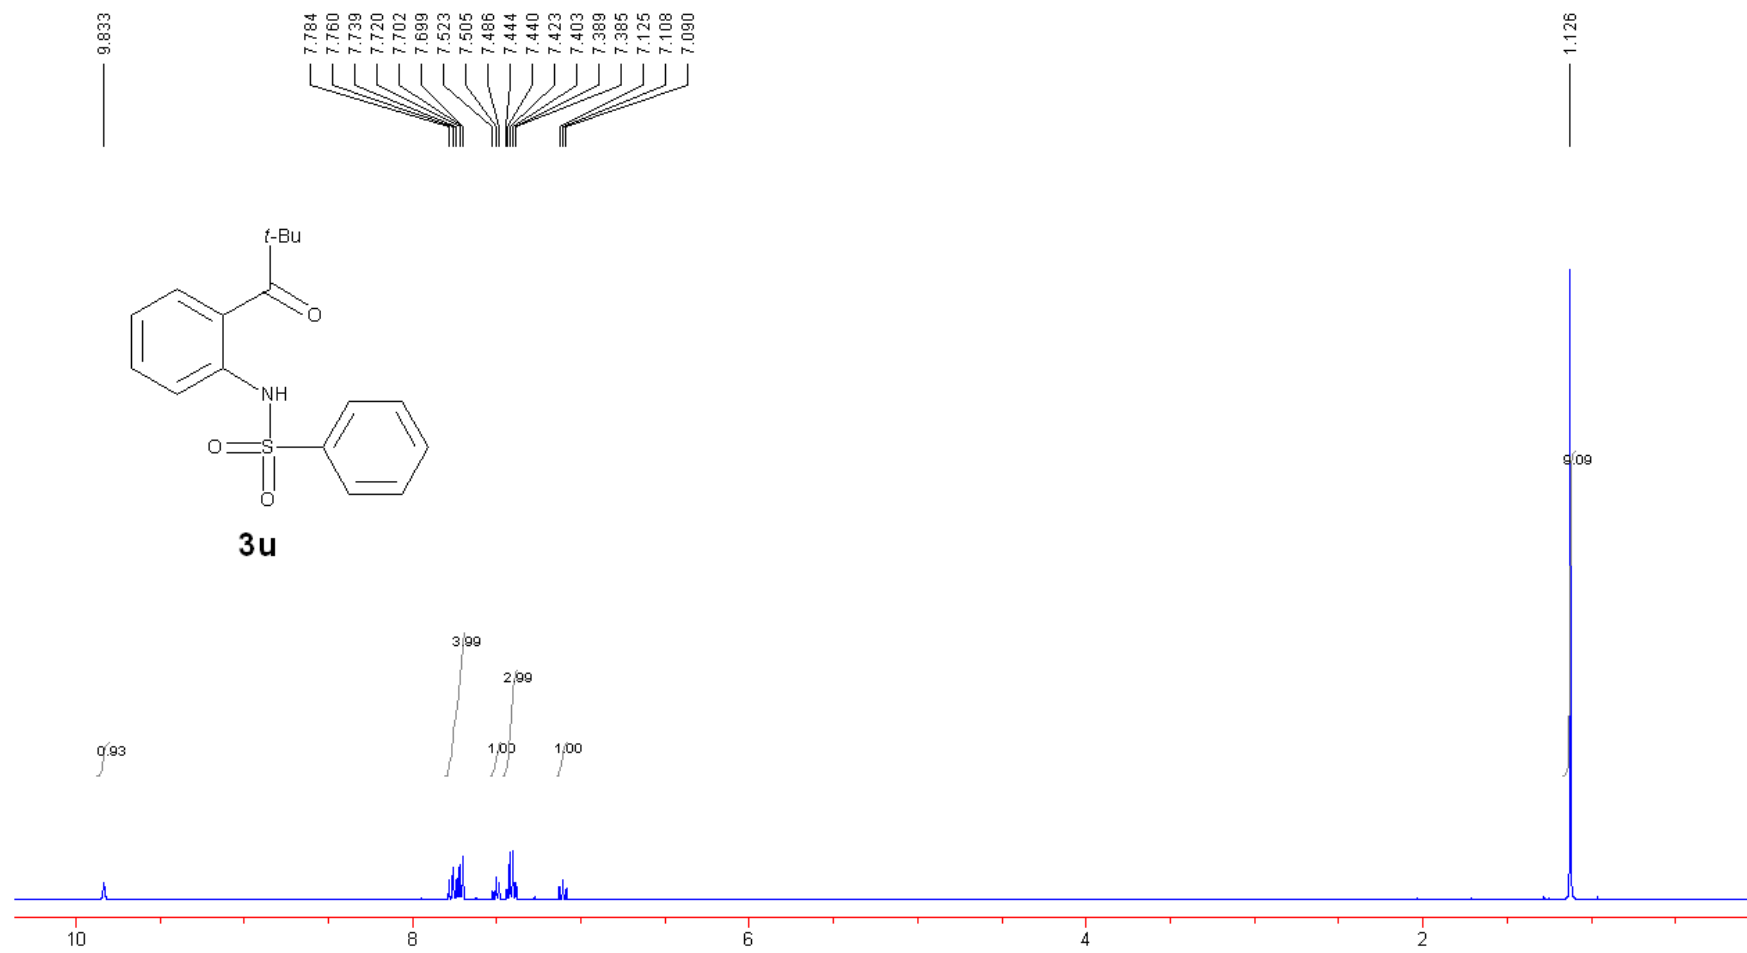

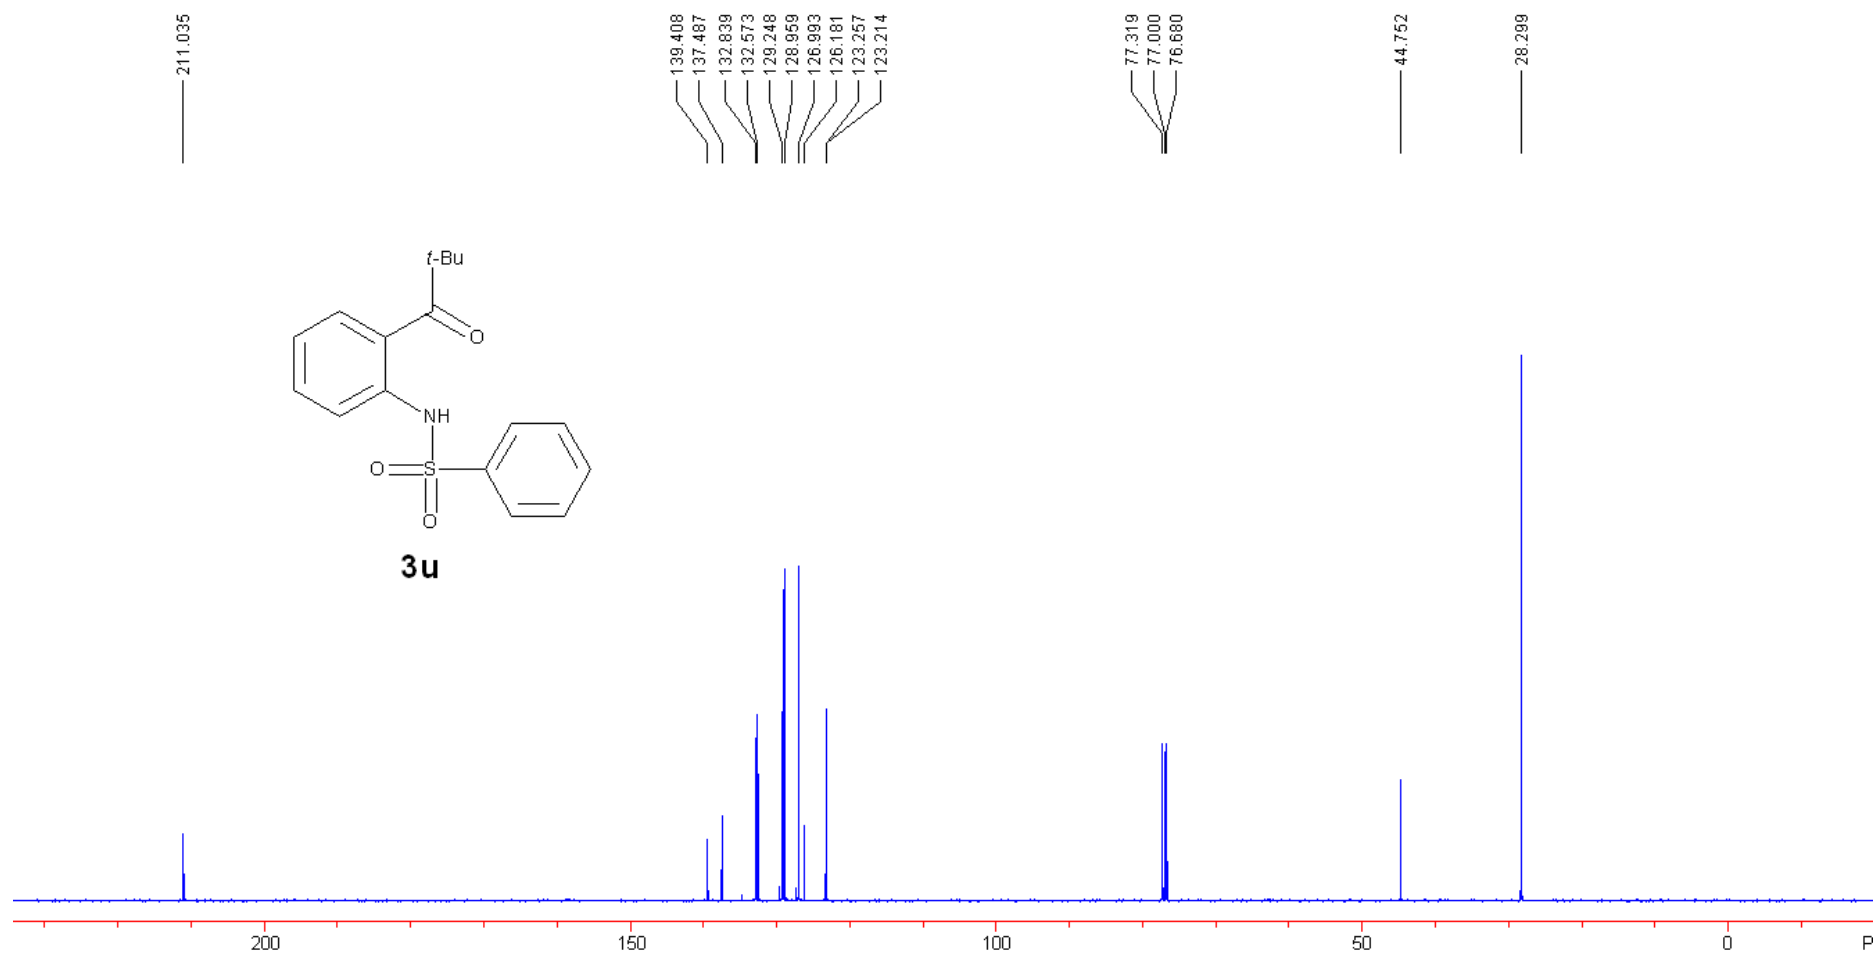

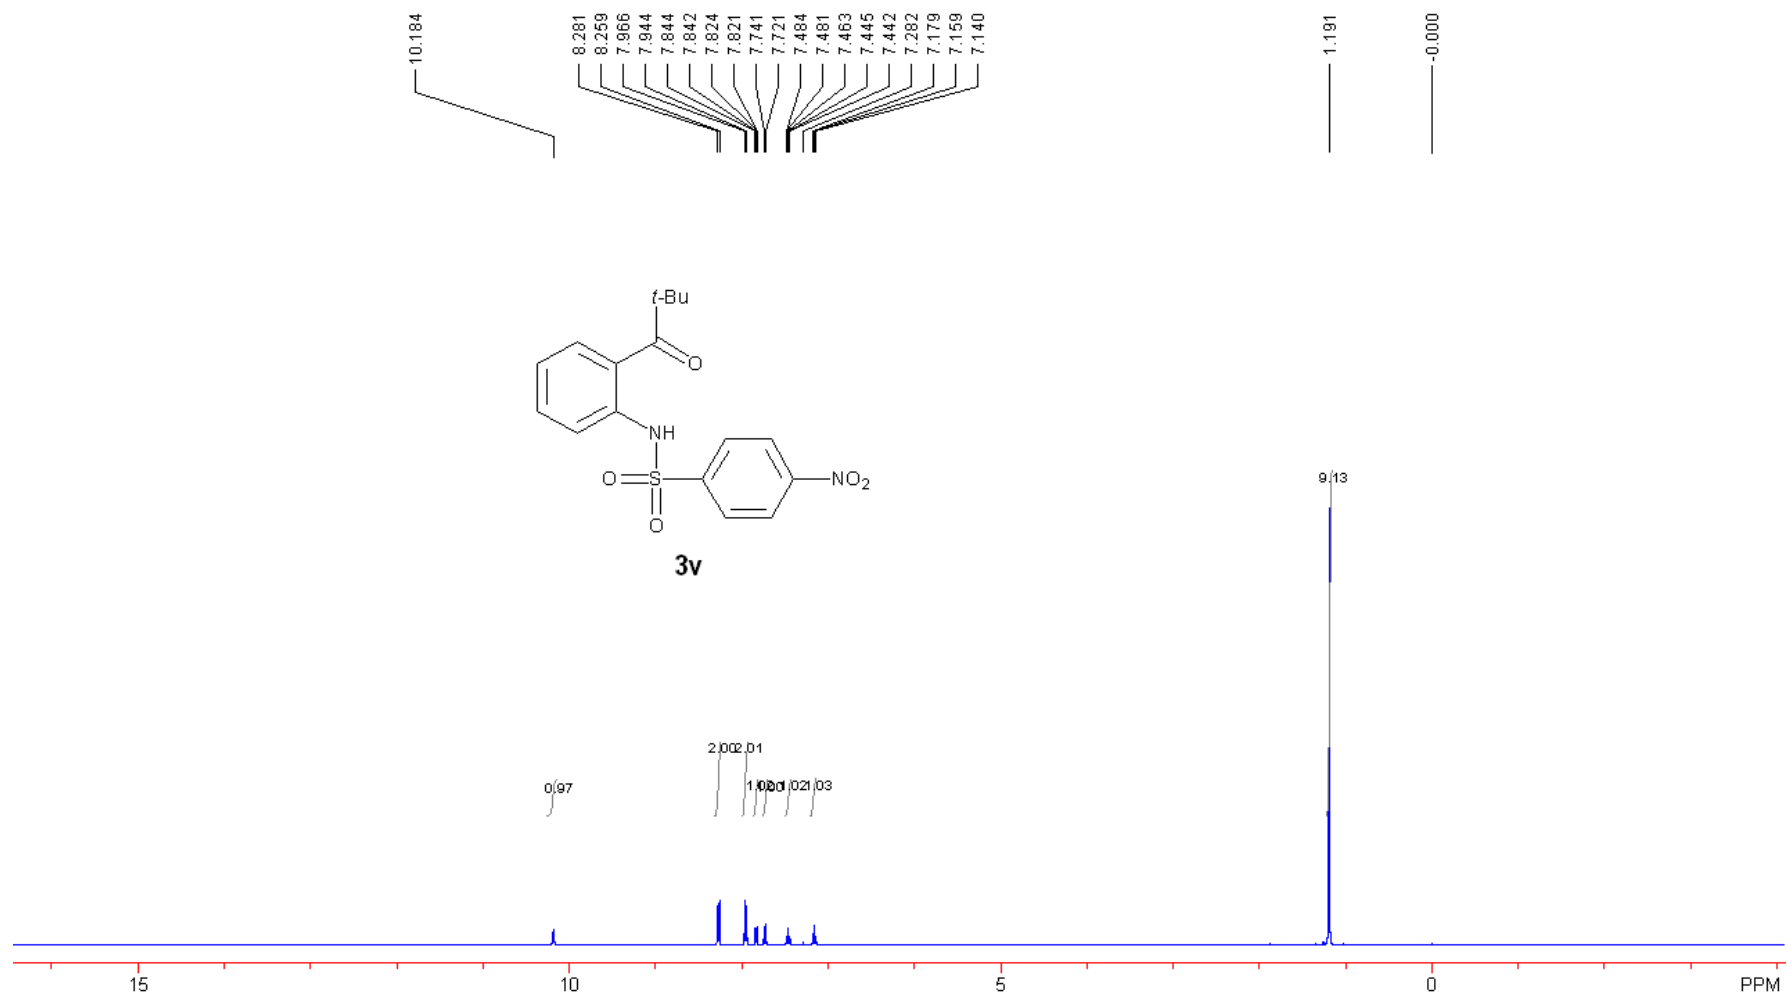

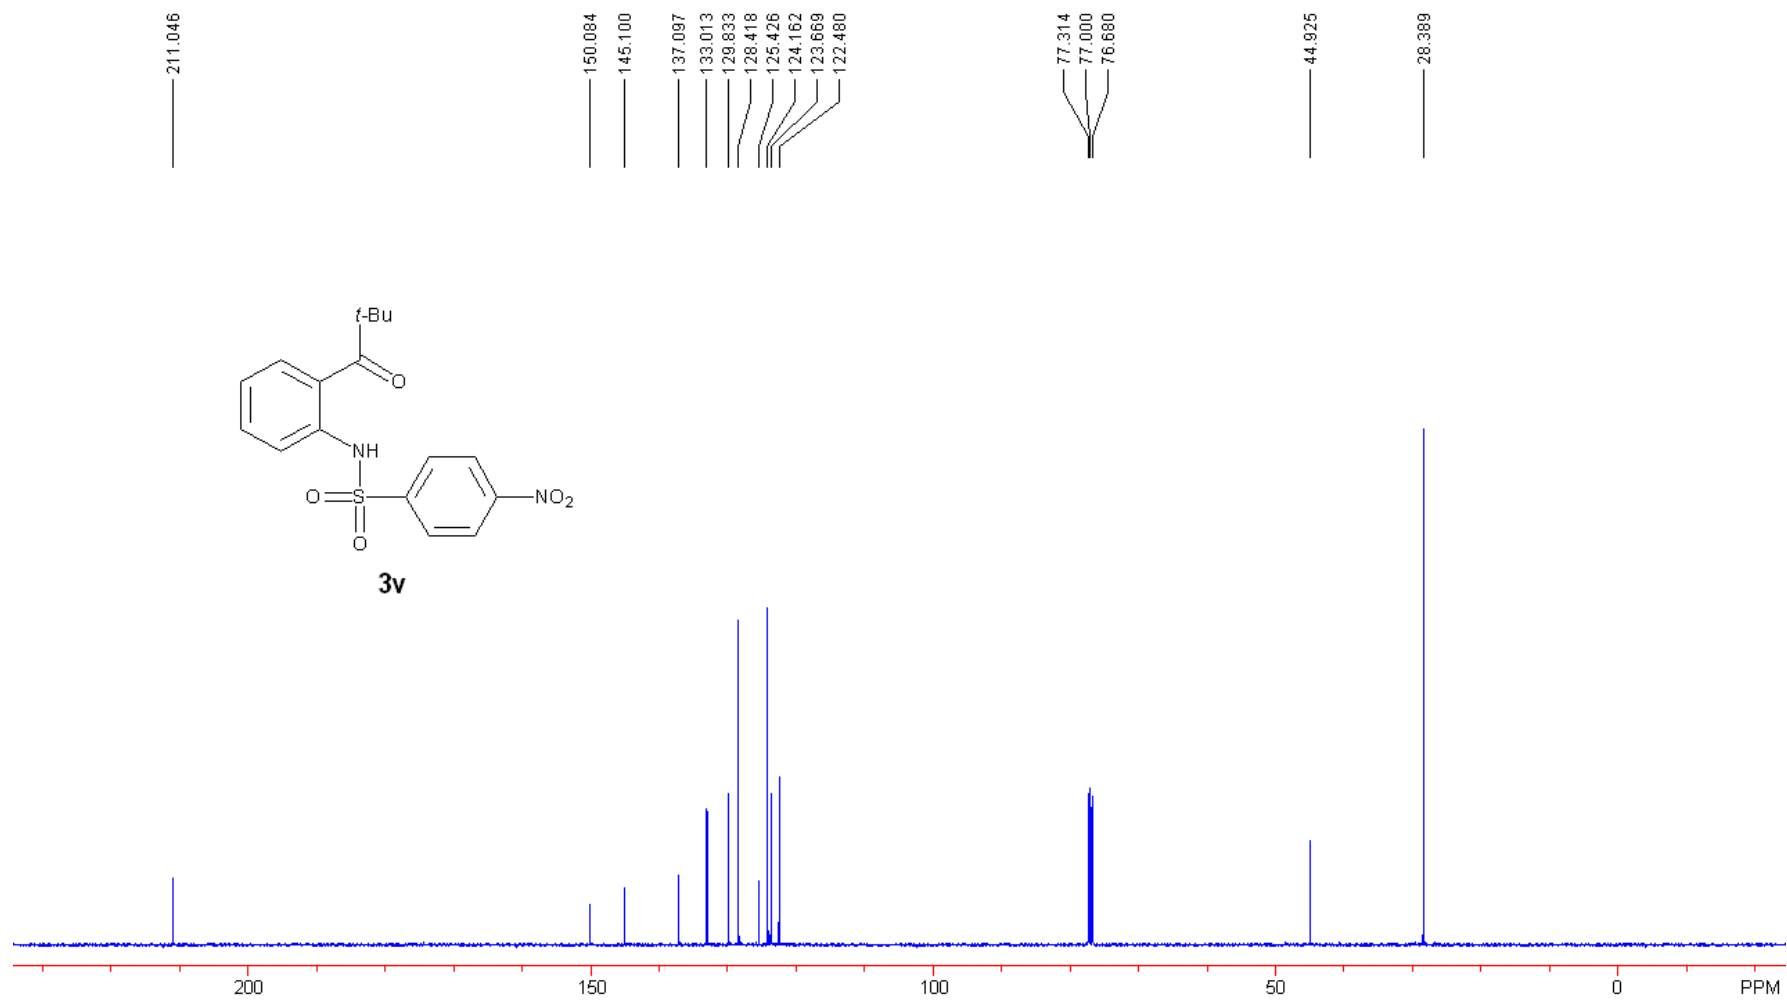

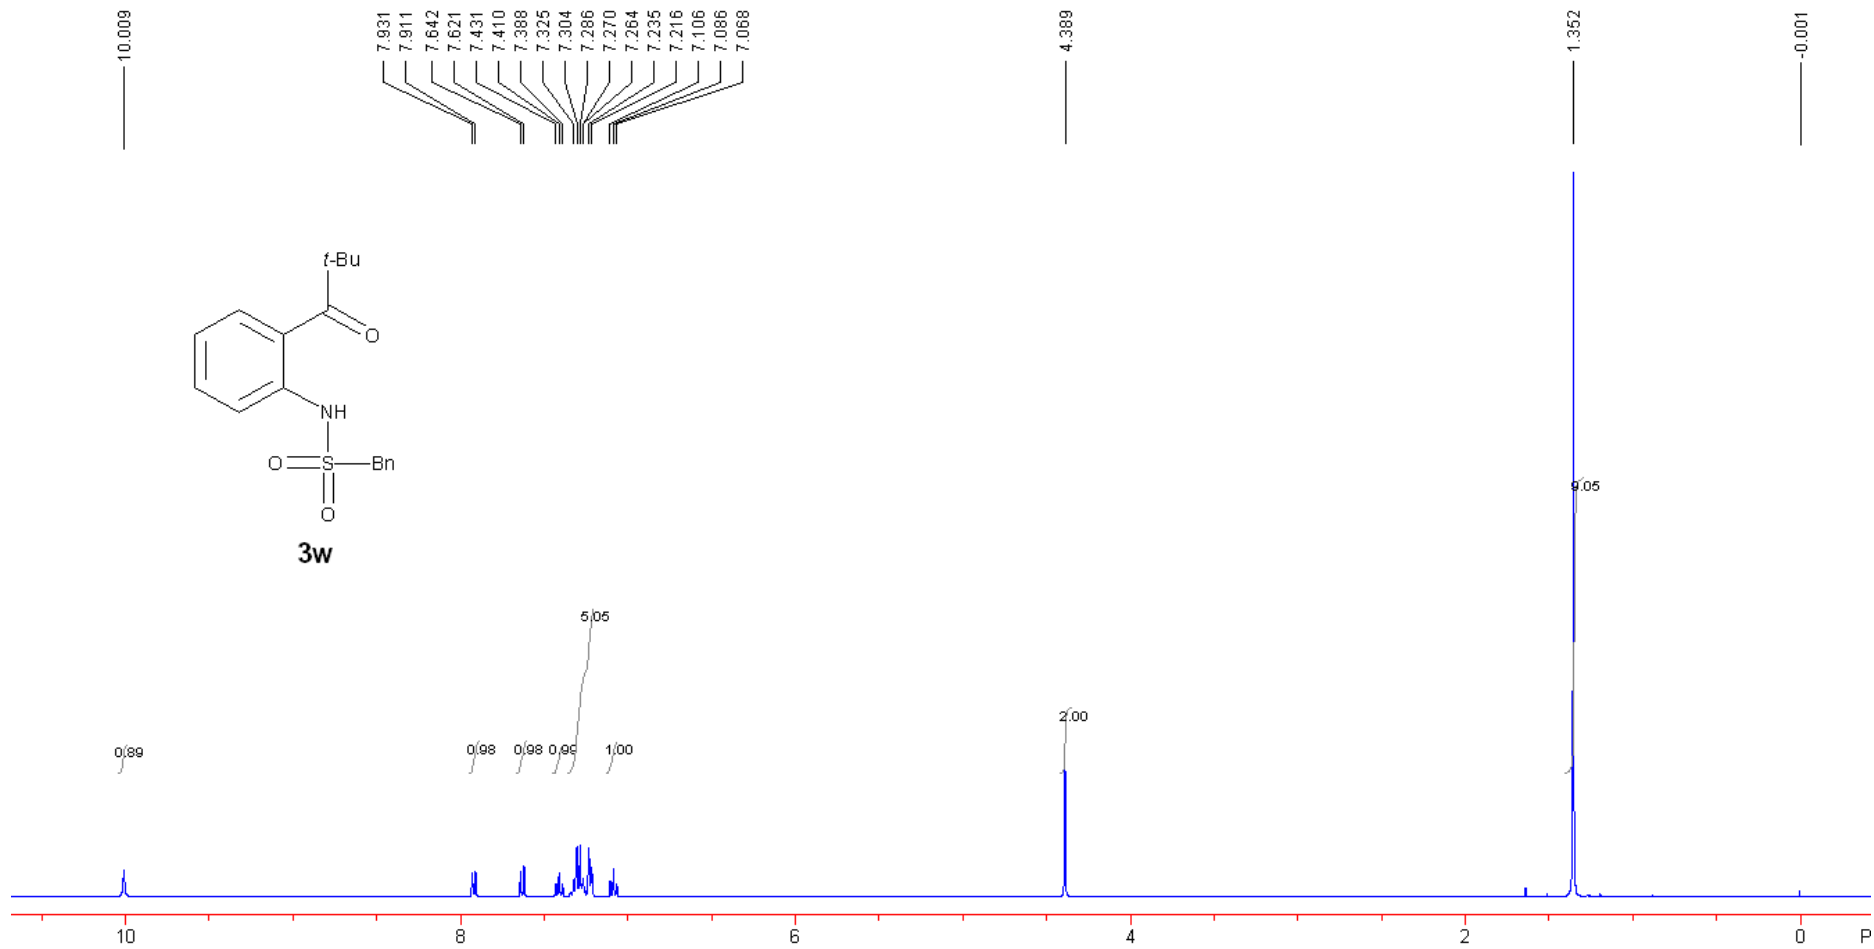

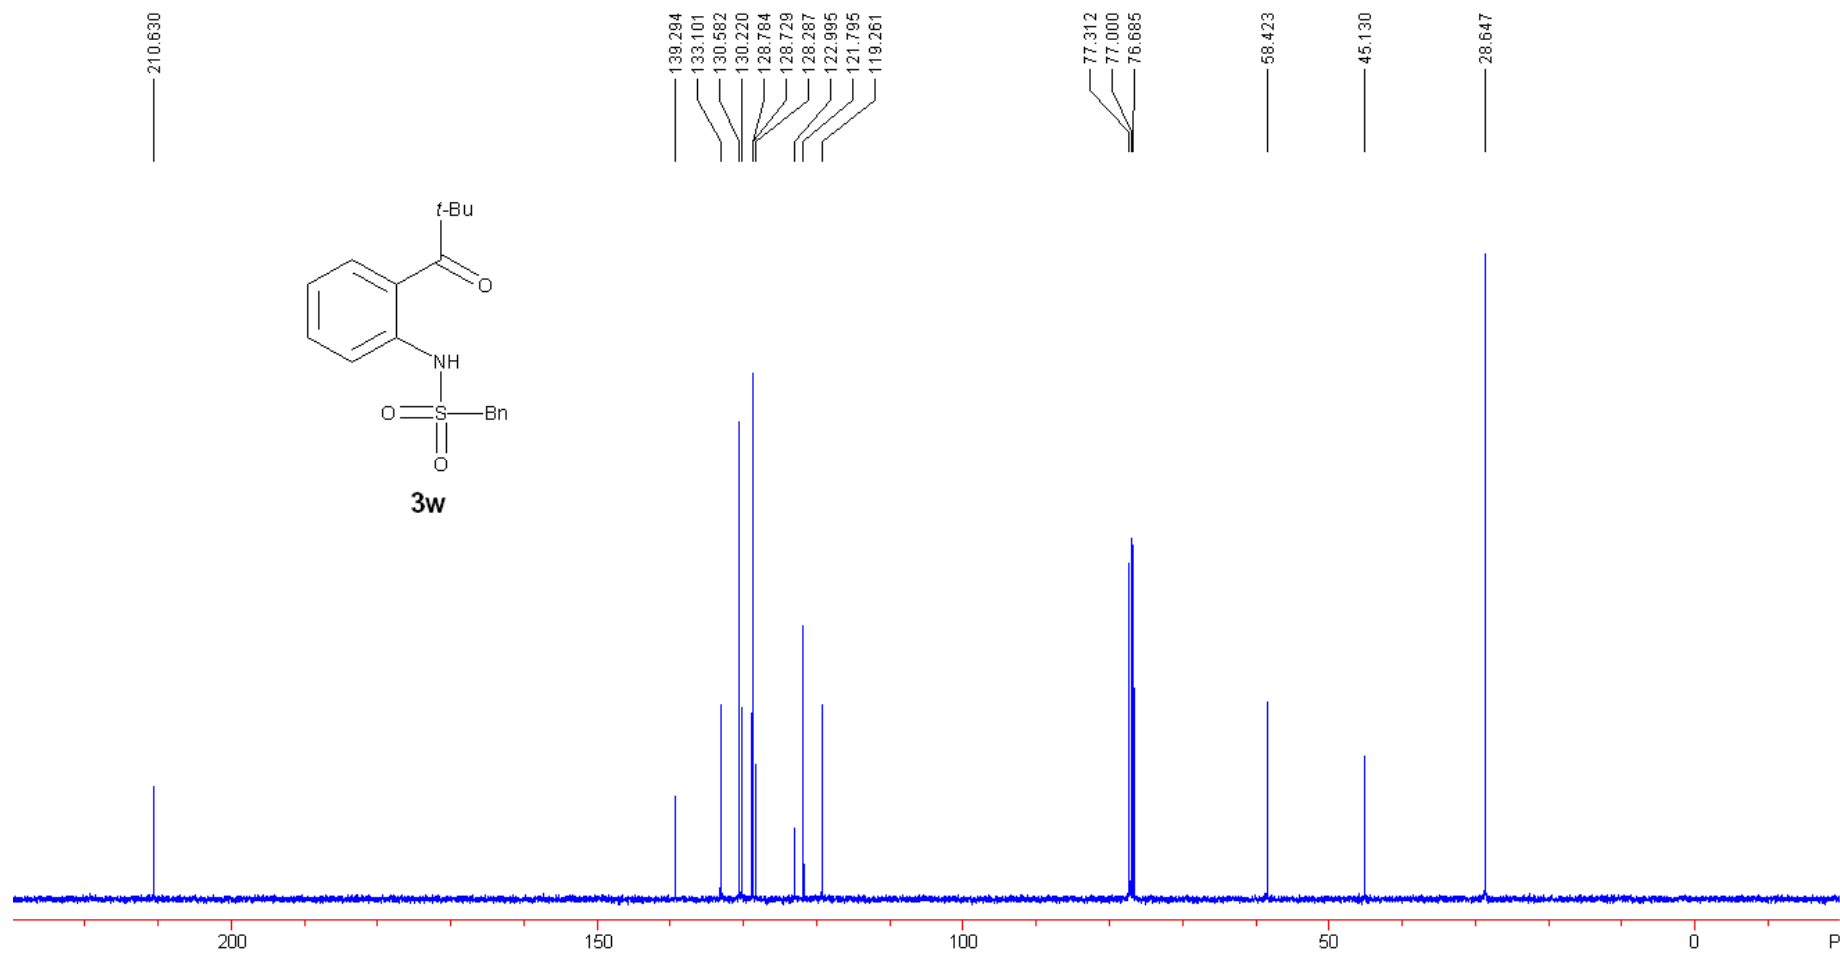



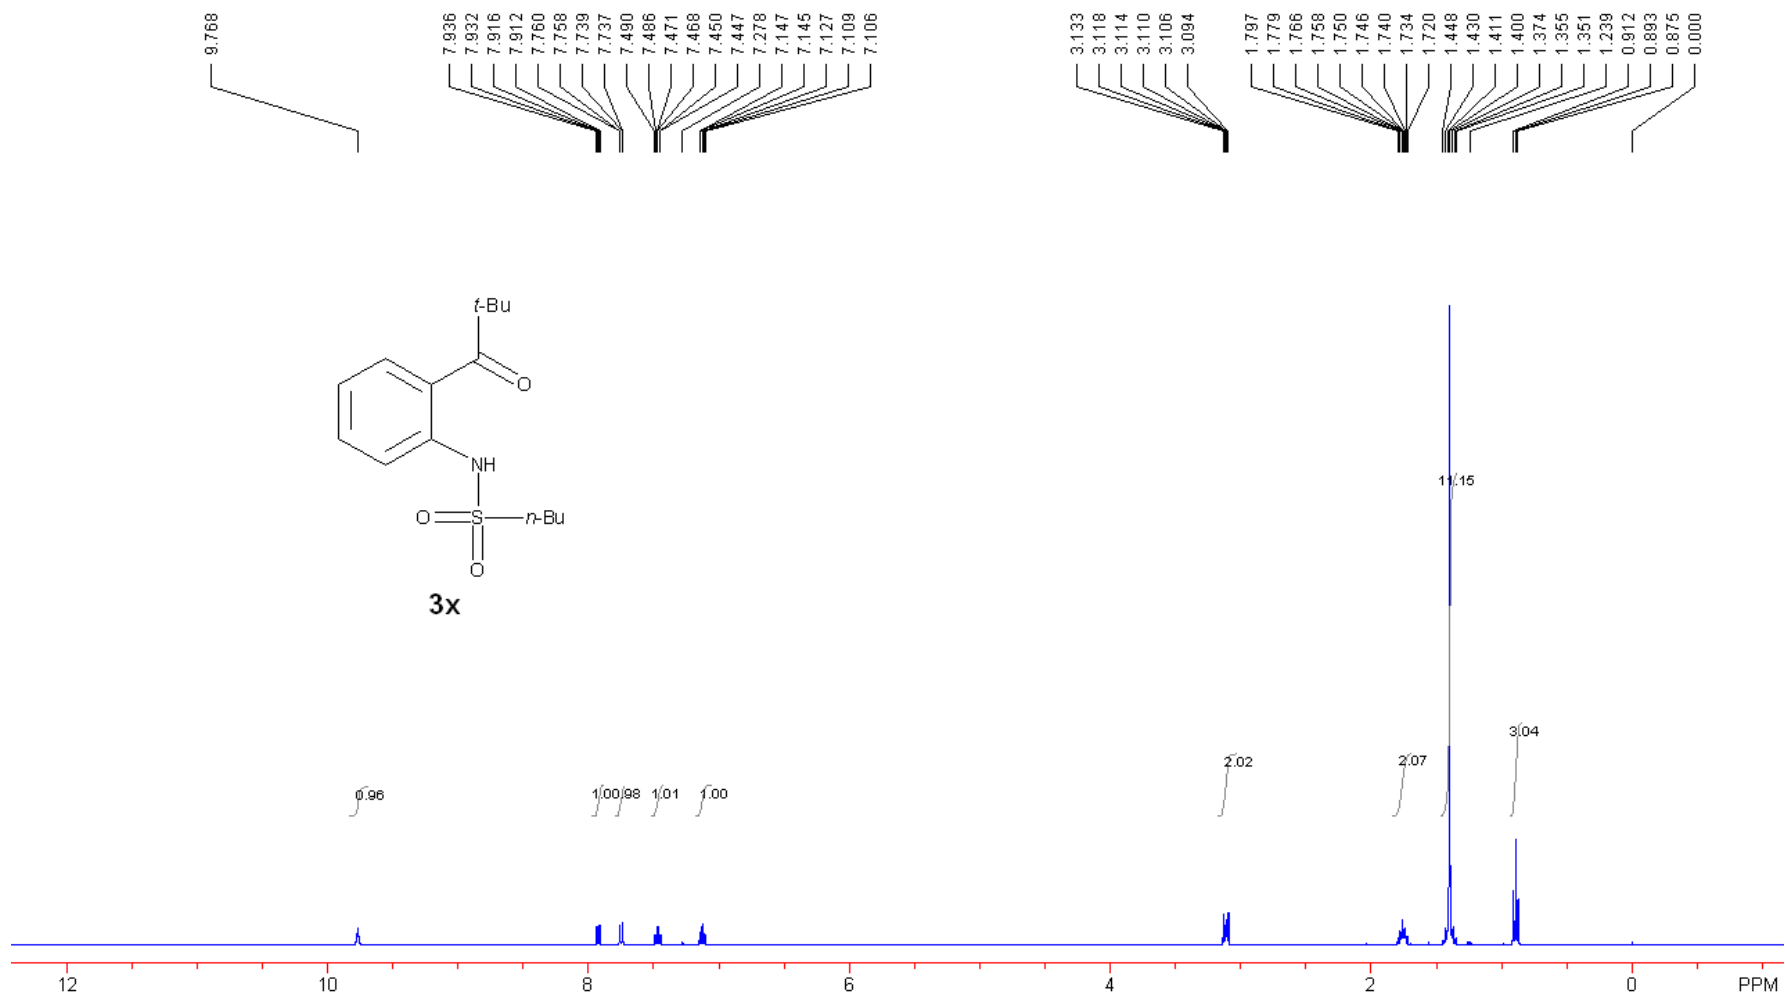

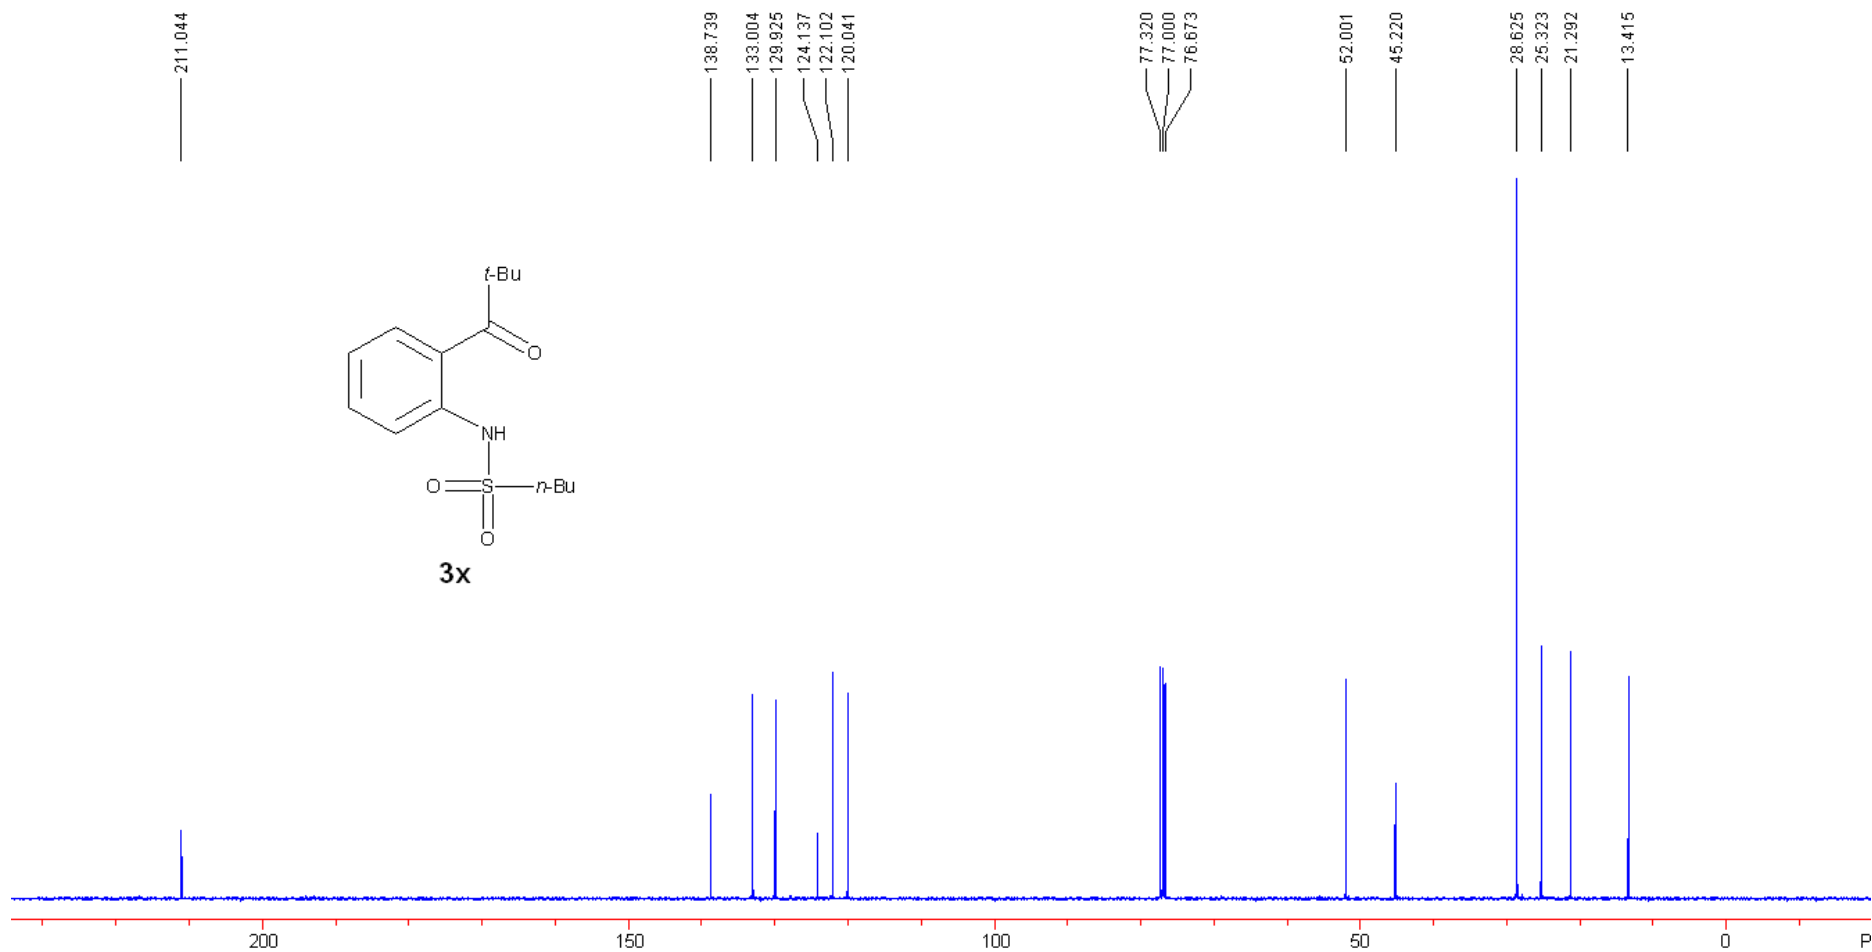

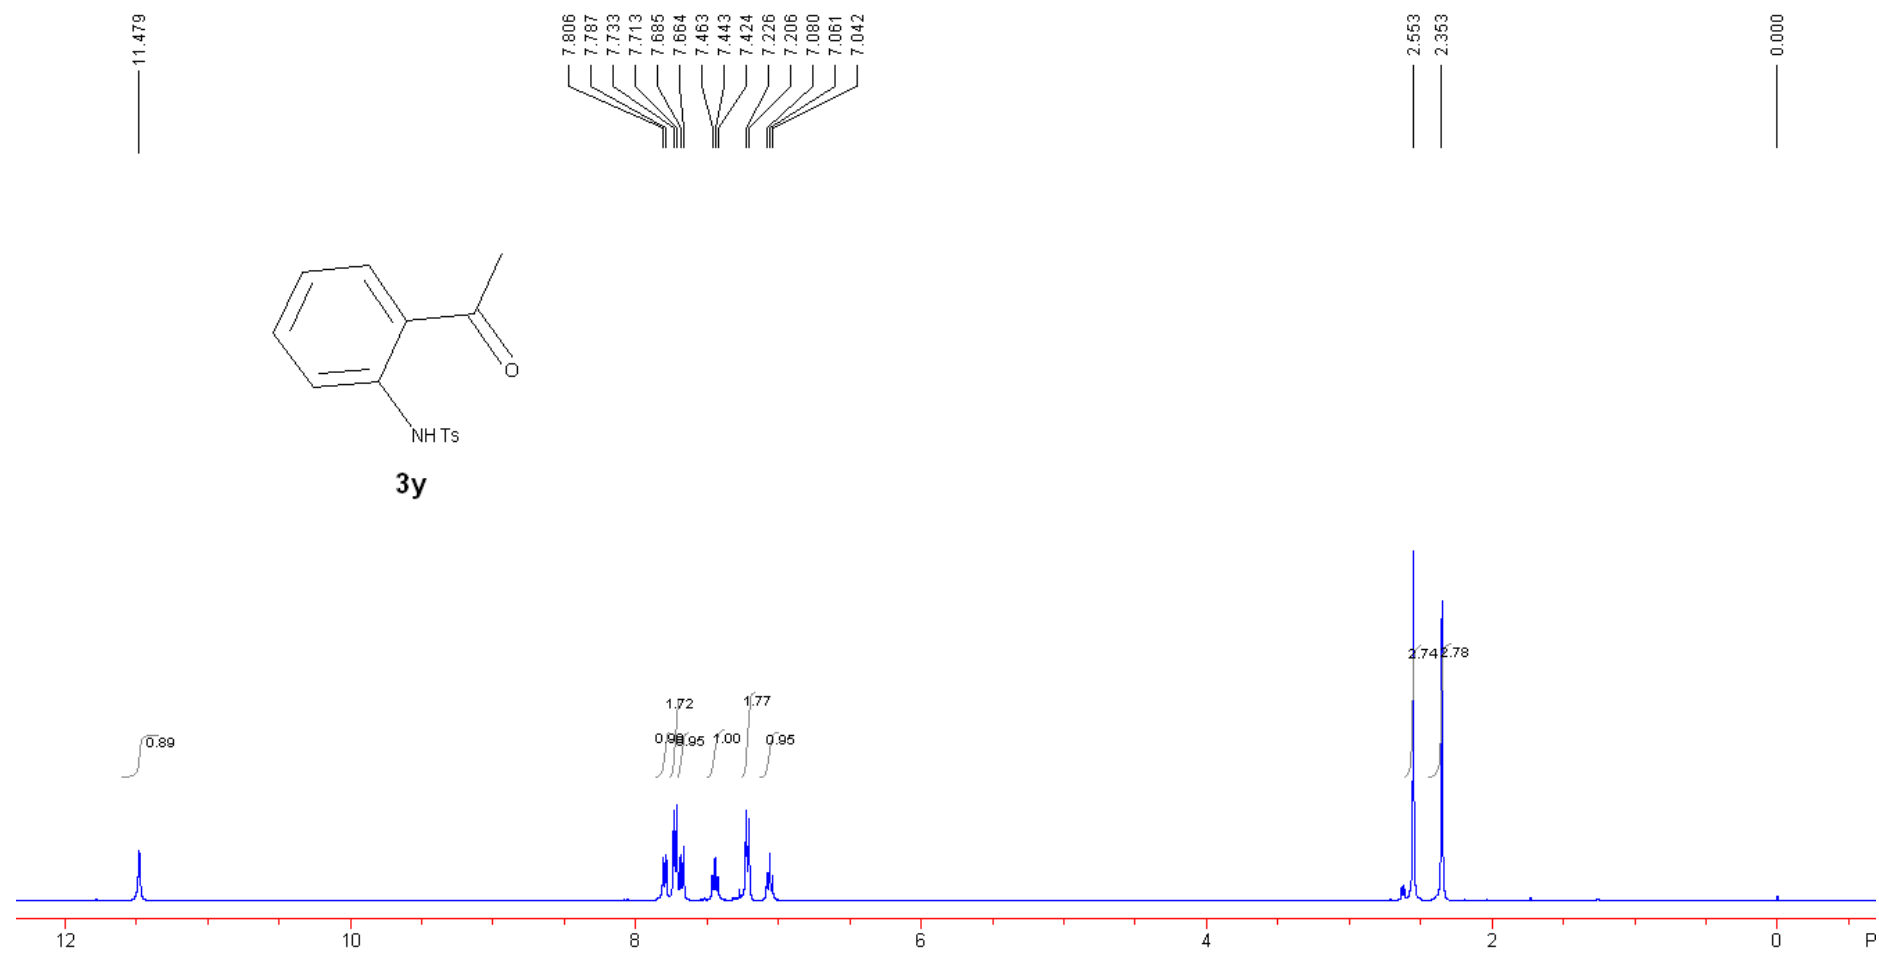

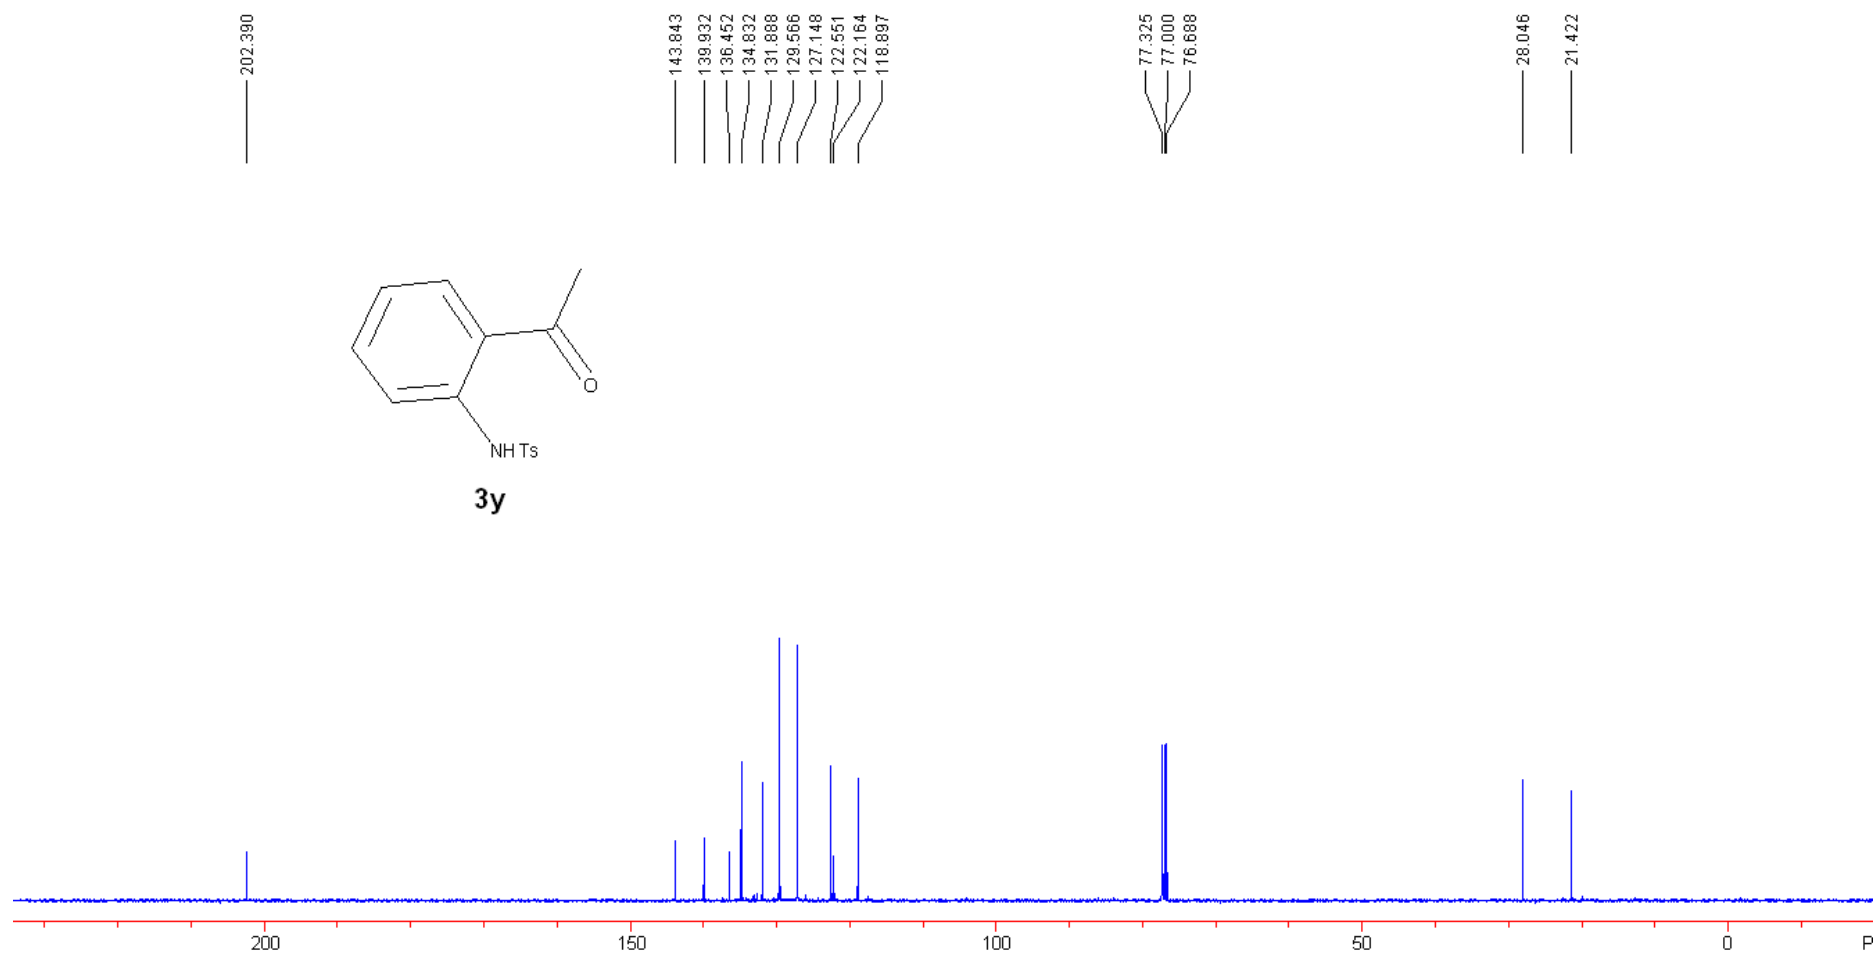

Supplement: c3cc42613k.pdf [file c3cc42613k.pdf]
